# Supplementary material for: Cholinesterase Inhibitory and Anti-Inflammatory Activity of the Naphtho- and Thienobenzo-Triazole Photoproducts: Experimental and Computational Study
Source: MDPI journal article supplement (doi:10.3390/ijms241914676), 2023-09-28
Supplement: s1 [file s1]

## Supplementary material

# Cholinesterase Inhibitory and Anti-Inflammatory Activity of the Naphtho- and Thienobenzo-Triazole Photoproducts: Experimental and Computational Study

Milena Mlakić <sup>1</sup>, Ivan Faraho <sup>2,\*</sup>, Ilijana Odak <sup>3</sup>, Borislav Kovačević <sup>4</sup>, Anamarija Raspudić <sup>3</sup>, Ivana Šagud <sup>5</sup>, Martina Bosnar <sup>2</sup>, Irena Škorić <sup>1</sup> and Danijela Barić <sup>4,\*</sup>

<sup>1</sup> Department of Organic Chemistry, Faculty of Chemical Engineering and Technology, University of Zagreb, Marulićev trg 19, HR-10000 Zagreb, Croatia; mdragojev@fkit.unizg.hr (M.M.); iskoric@fkit.unizg.hr (I.Š.)

<sup>2</sup> Pharmacology in vitro, Selvita Ltd., Prilaz baruna Filipovića 29, HR-10000 Zagreb, Croatia; martina.bosnar@selvita.com

<sup>3</sup> Department of Chemistry, Faculty of Science and Education, University of Mostar, Matice Hrvatske bb, 88000 Mostar, Bosnia and Herzegovina; ilijana.odak@fpmoz.sum.ba (I.O.); anamarijaraspudic1@gmail.com (A.R.)

<sup>4</sup> Group for Computational Life Sciences, Division of Physical Chemistry, Ruđer Bošković Institute, Bijenička Cesta 54, HR-10000 Zagreb, Croatia; borislav.kovacevic@irb.hr

<sup>5</sup> Croatian Agency for Medicinal Products and Medical Devices, Ksaverska Cesta 4, HR-10000 Zagreb, Croatia; ivana.sagud@halmed.hr

\* Correspondence: ivan.faraho@selvita.com (I.F.); dbaric@irb.hr (D.B.)

## Contents

|                                                                                               |    |
|-----------------------------------------------------------------------------------------------|----|
| 1. NMR spectra of naphtho- and thienobenzo-triazoles (S1-S78).....                            | 2  |
| 2. MS spectra and HRMS analyses of naphtho- and thienobenzo-triazoles (S79-S91).....          | 41 |
| 3. Tables S1 and S2, free energies of binding obtained by docking.....                        | 48 |
| 4. Tables S3 and S4, RMSD, RMSF, and Rg for protein-ligand complexes from MD simulations..... | 49 |

## 1. NMR spectra of naphtho- and thienobenzo-triazoles

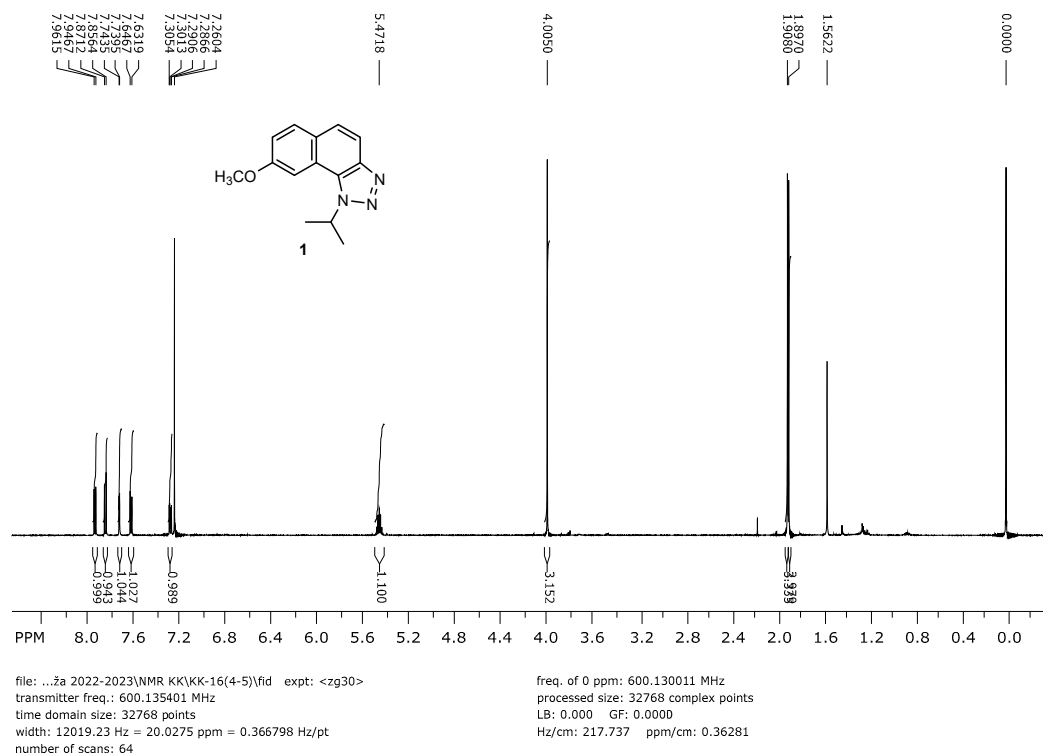

Figure S1.  $^1\text{H}$  NMR ( $\text{CDCl}_3$ ) spectrum of **1**.

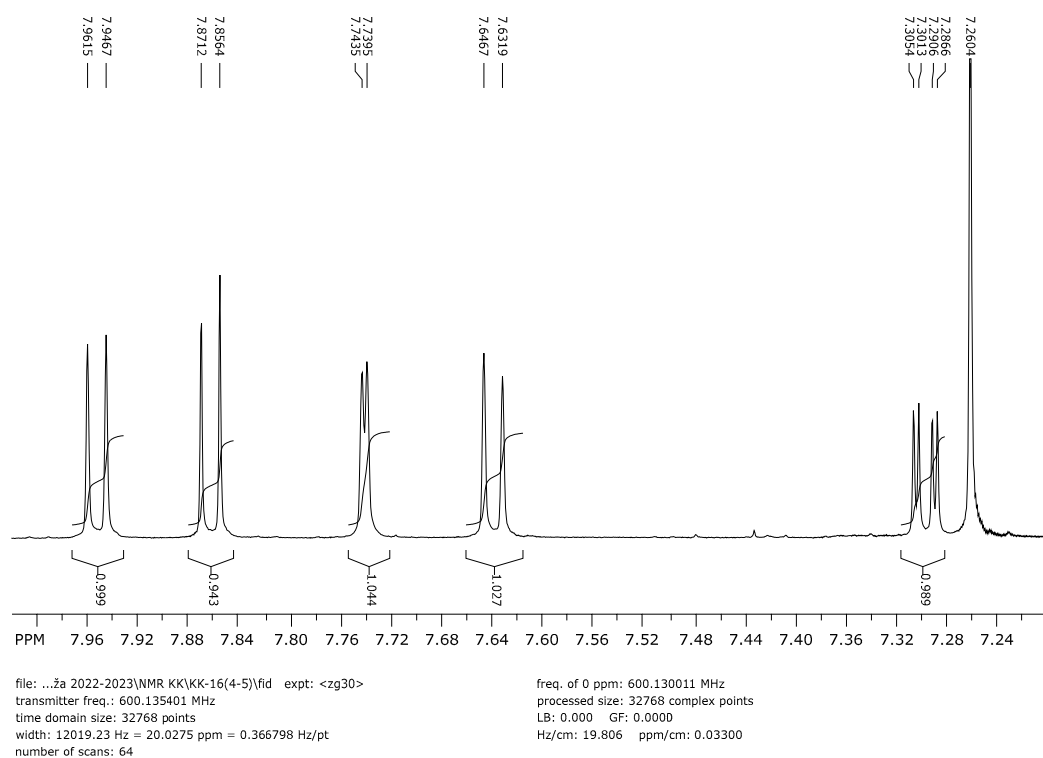

Figure S2.  $^1\text{H}$  NMR ( $\text{CDCl}_3$ ) spectrum of aromatic part of **1**.

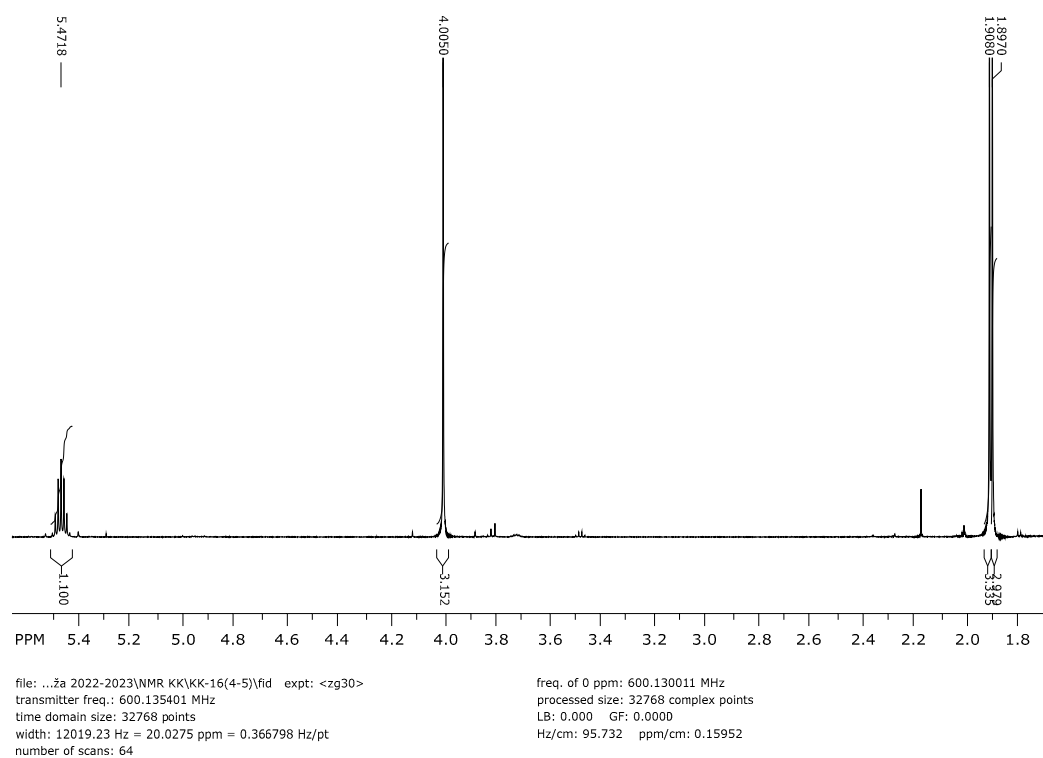

Figure S3.  $^1\text{H}$  NMR ( $\text{CDCl}_3$ ) spectrum of aliphatic part of **1**.

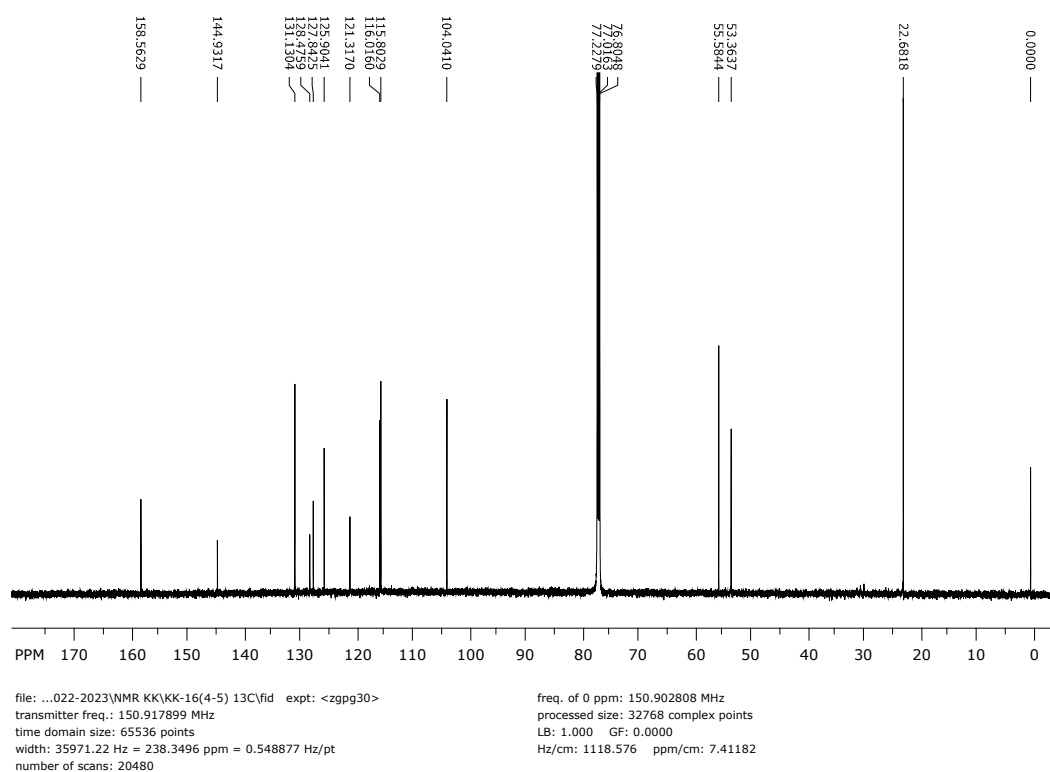

Figure S4.  $^{13}\text{C}$  NMR ( $\text{CDCl}_3$ ) spectrum of **1**.

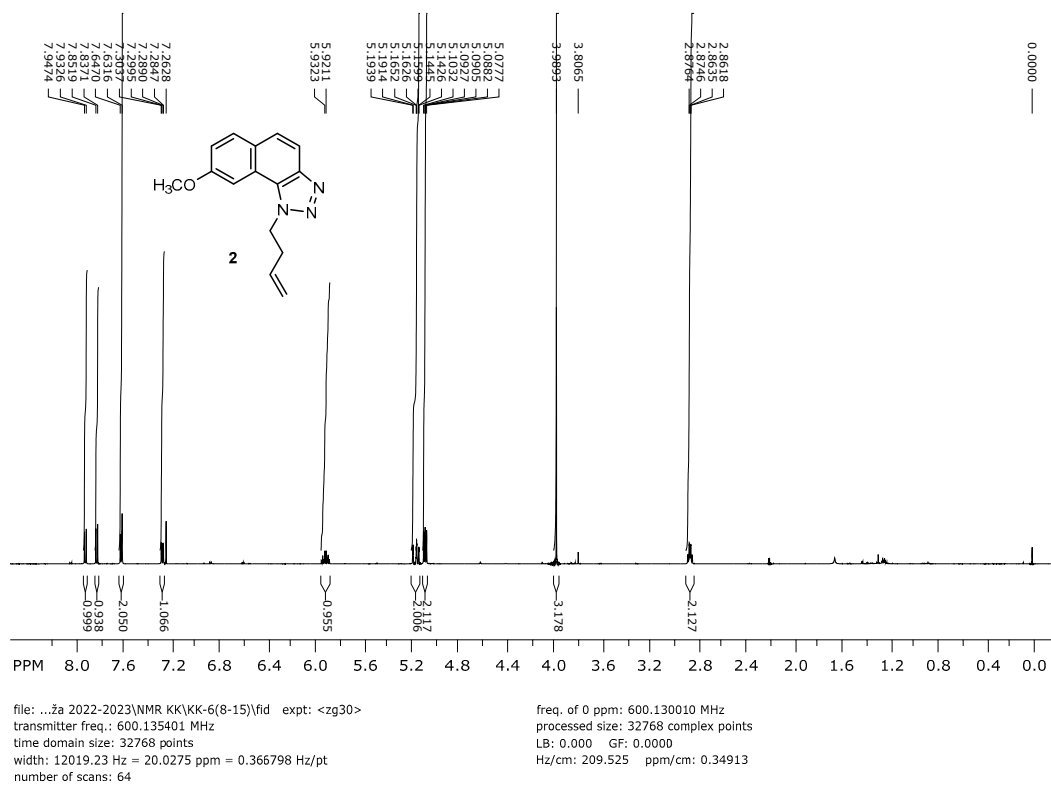

Figure S5.  $^1\text{H}$  NMR ( $\text{CDCl}_3$ ) spectrum of **2**.

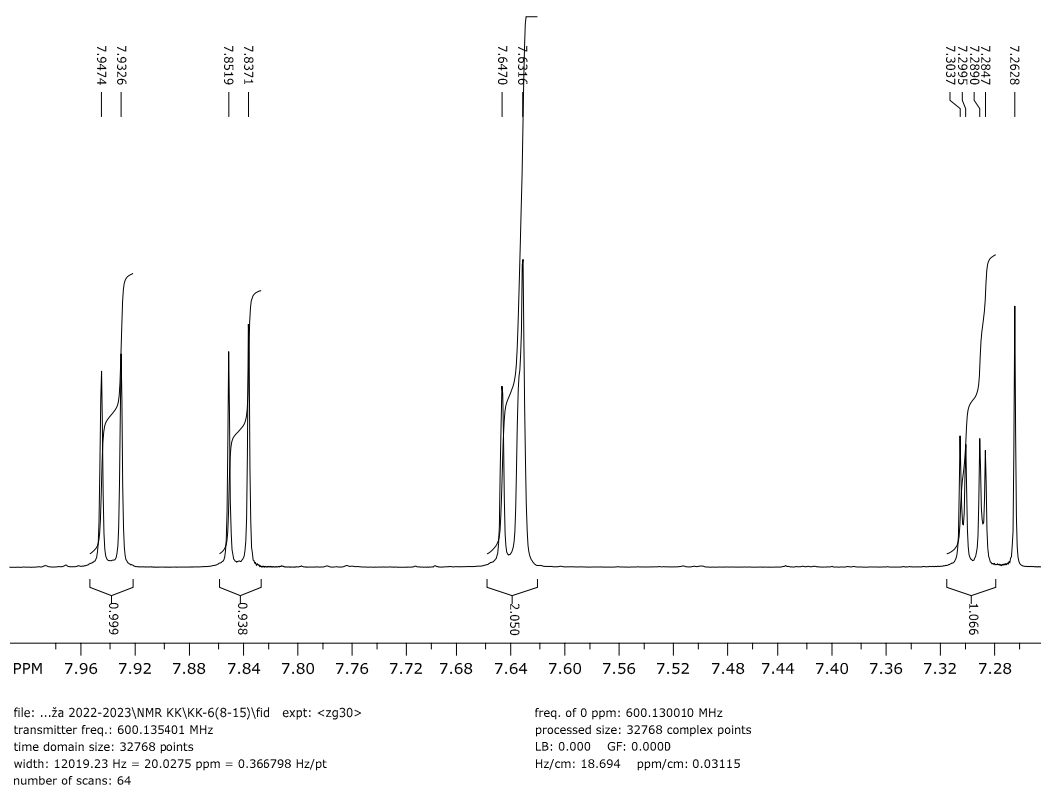

Figure S6.  $^1\text{H}$  NMR ( $\text{CDCl}_3$ ) spectrum of aromatic part of **2**.

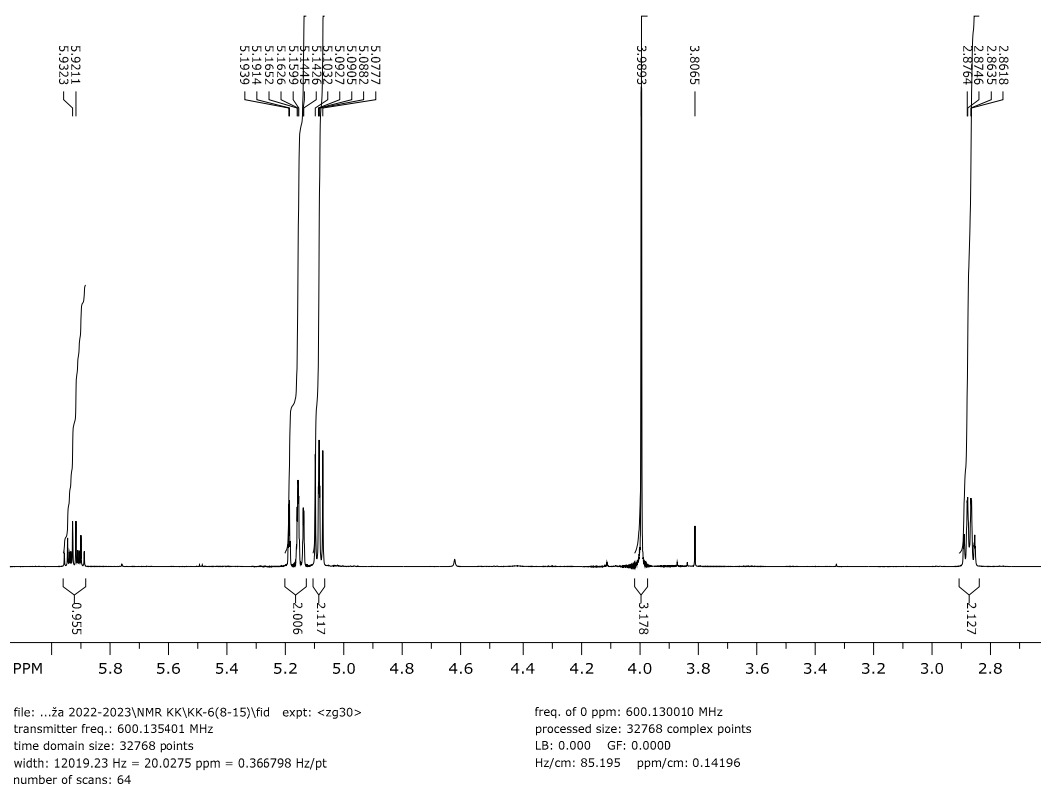

Figure S7.  $^1\text{H}$  NMR ( $\text{CDCl}_3$ ) spectrum of aliphatic part of **2**.

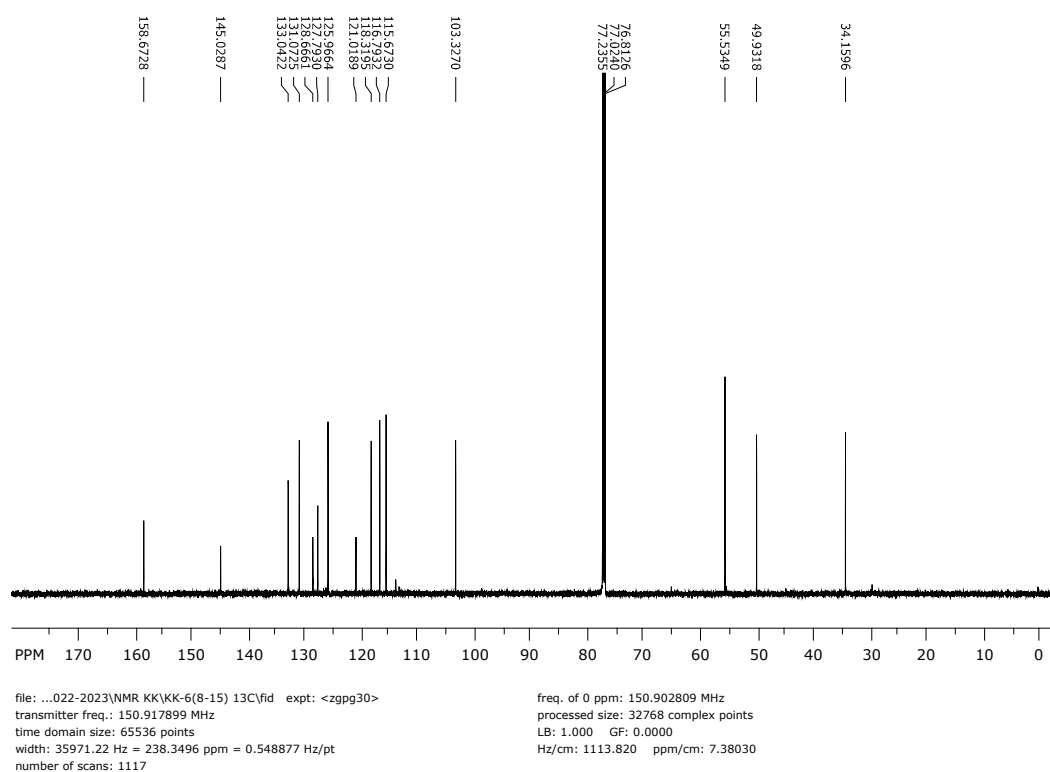

Figure S8.  $^{13}\text{C}$  NMR ( $\text{CDCl}_3$ ) spectrum of **2**.

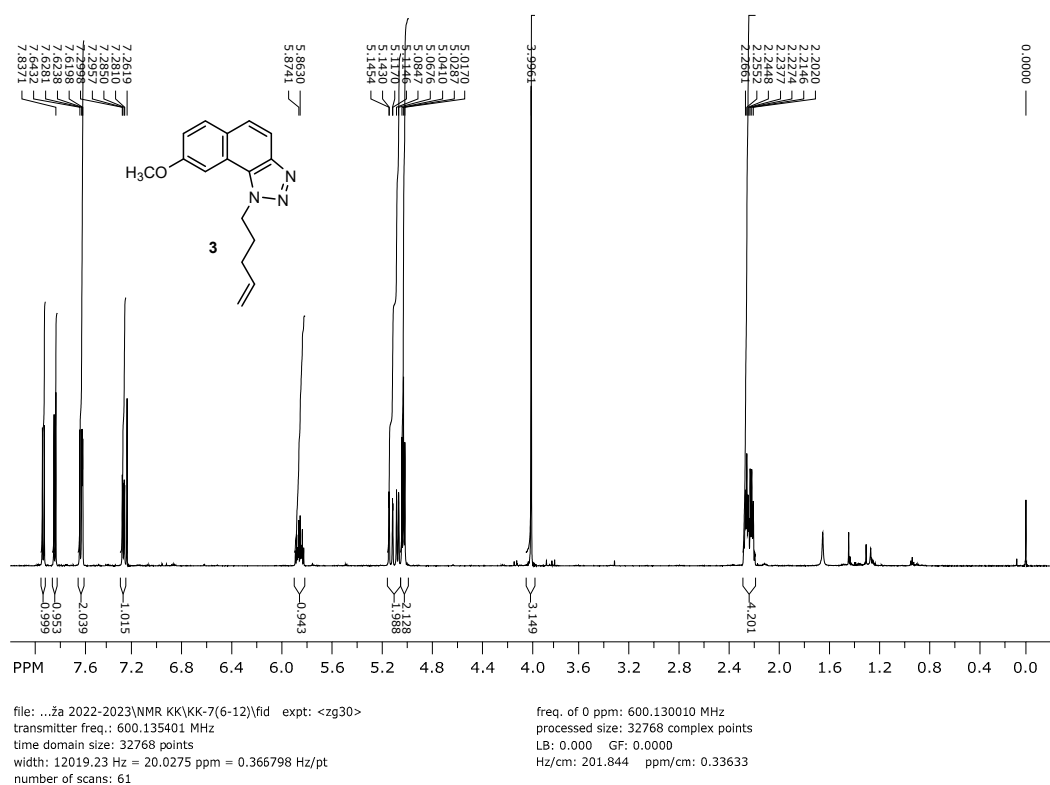

Figure S9.  $^1\text{H}$  NMR ( $\text{CDCl}_3$ ) spectrum of **3**.

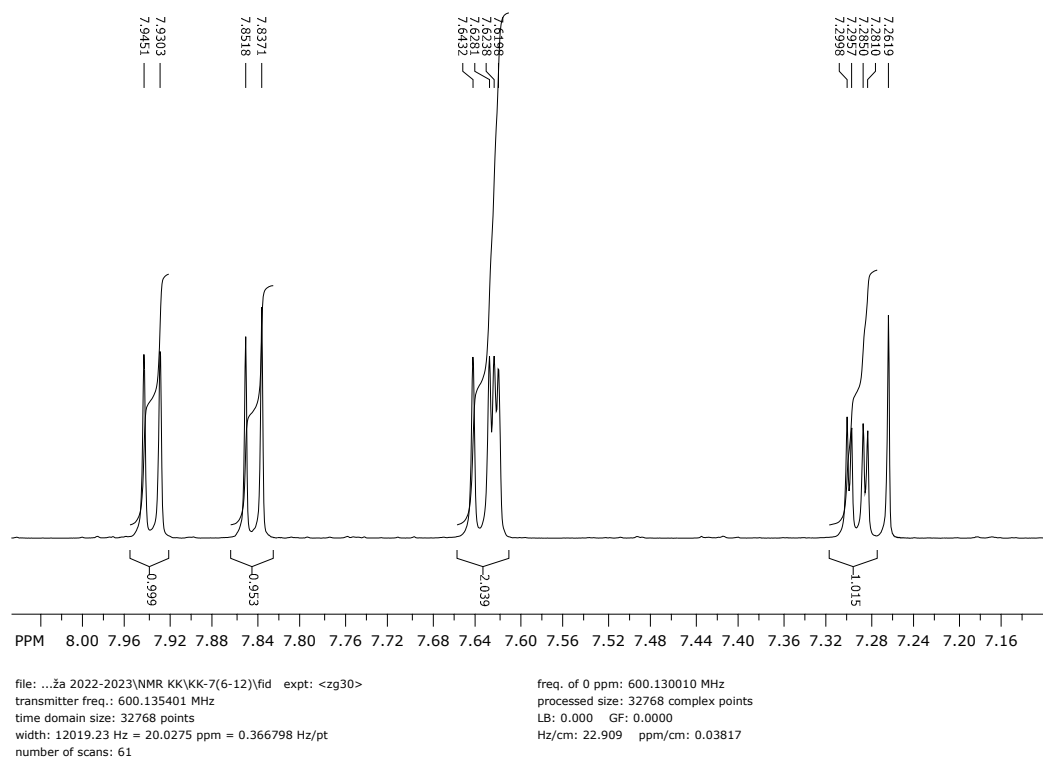

Figure S10.  $^1\text{H}$  NMR ( $\text{CDCl}_3$ ) spectrum of aromatic part of **3**.

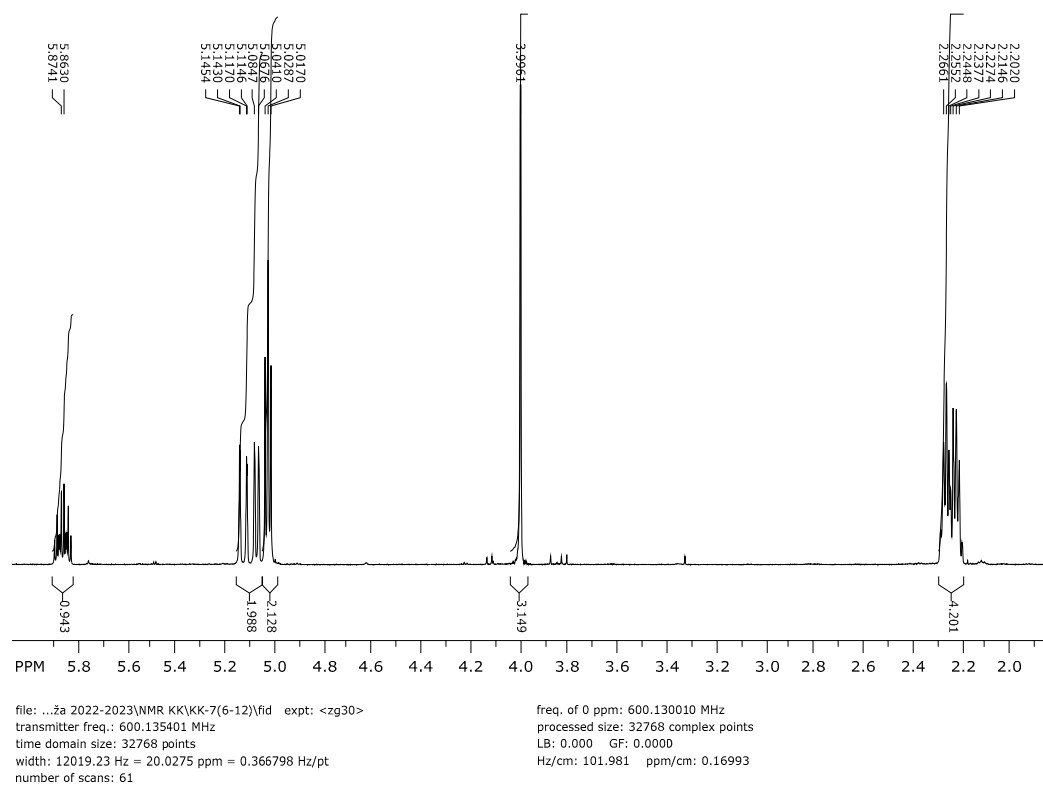

Figure S11.  $^1\text{H}$  NMR ( $\text{CDCl}_3$ ) spectrum of aliphatic part of **3**.

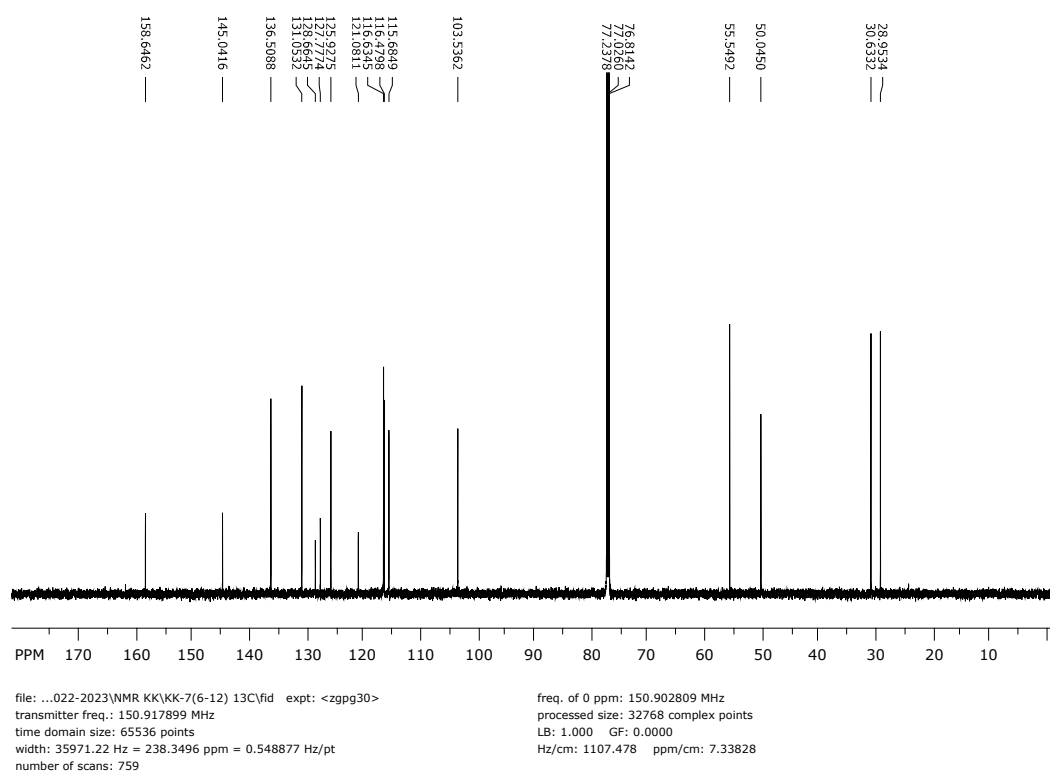

Figure S12.  $^{13}\text{C}$  NMR ( $\text{CDCl}_3$ ) spectrum of **3**.

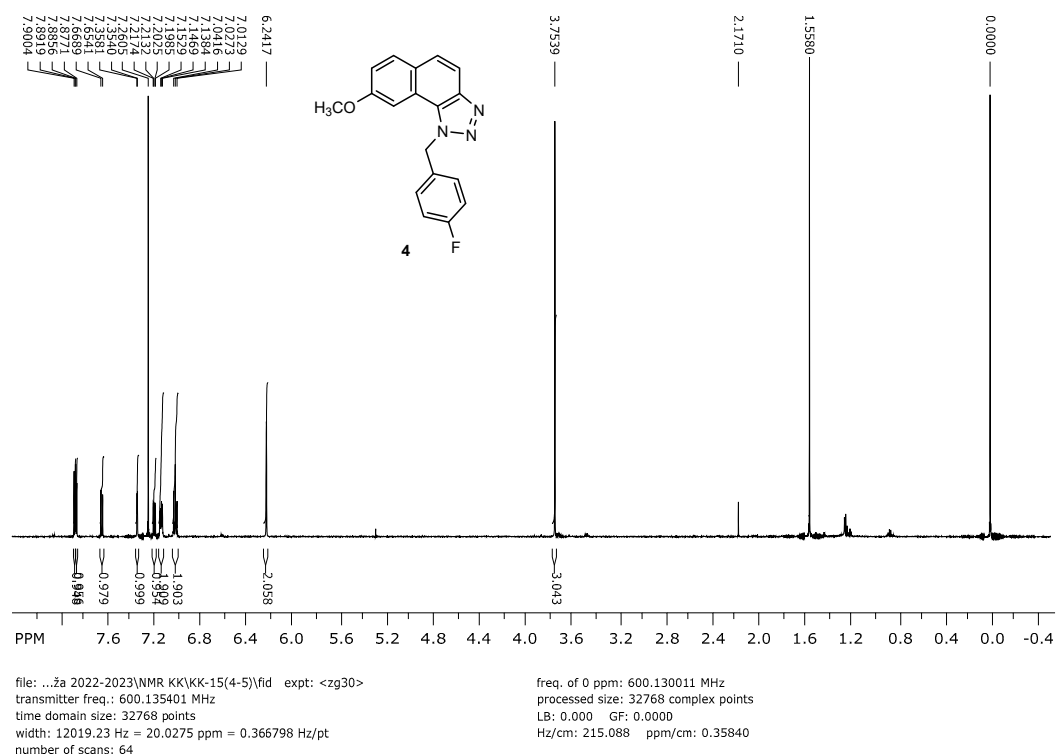

Figure S13.  $^1\text{H}$  NMR ( $\text{CDCl}_3$ ) spectrum of **4**.



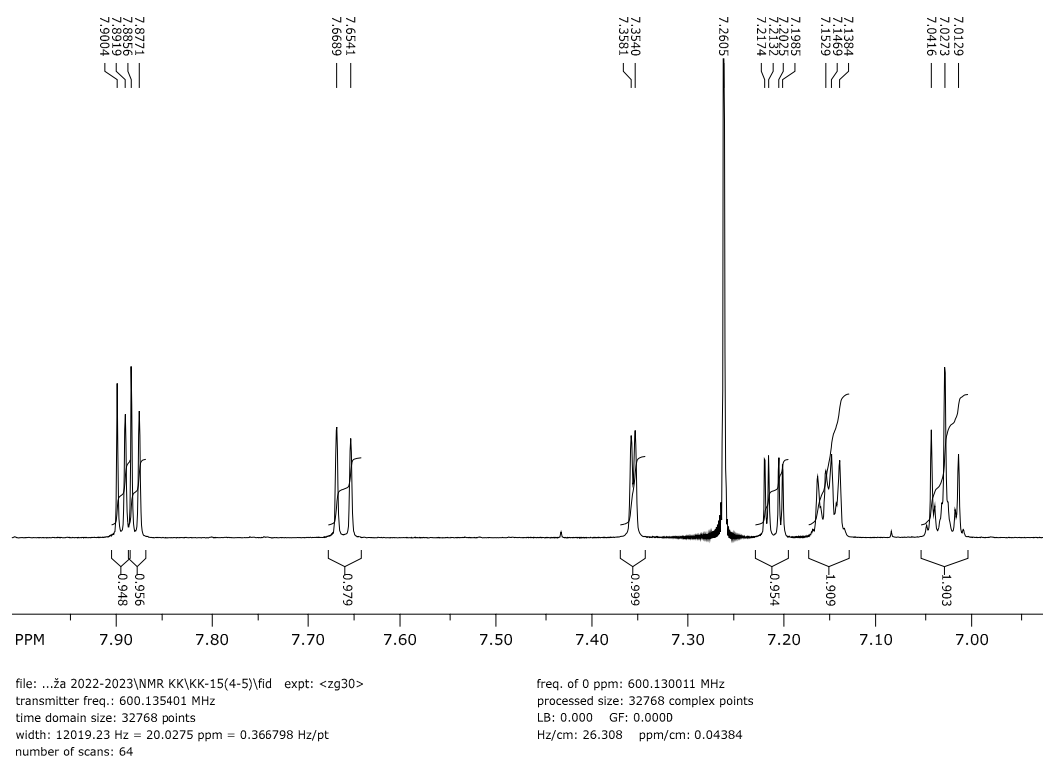

Figure S14.  $^1\text{H}$  NMR ( $\text{CDCl}_3$ ) spectrum of aromatic part of **4**.

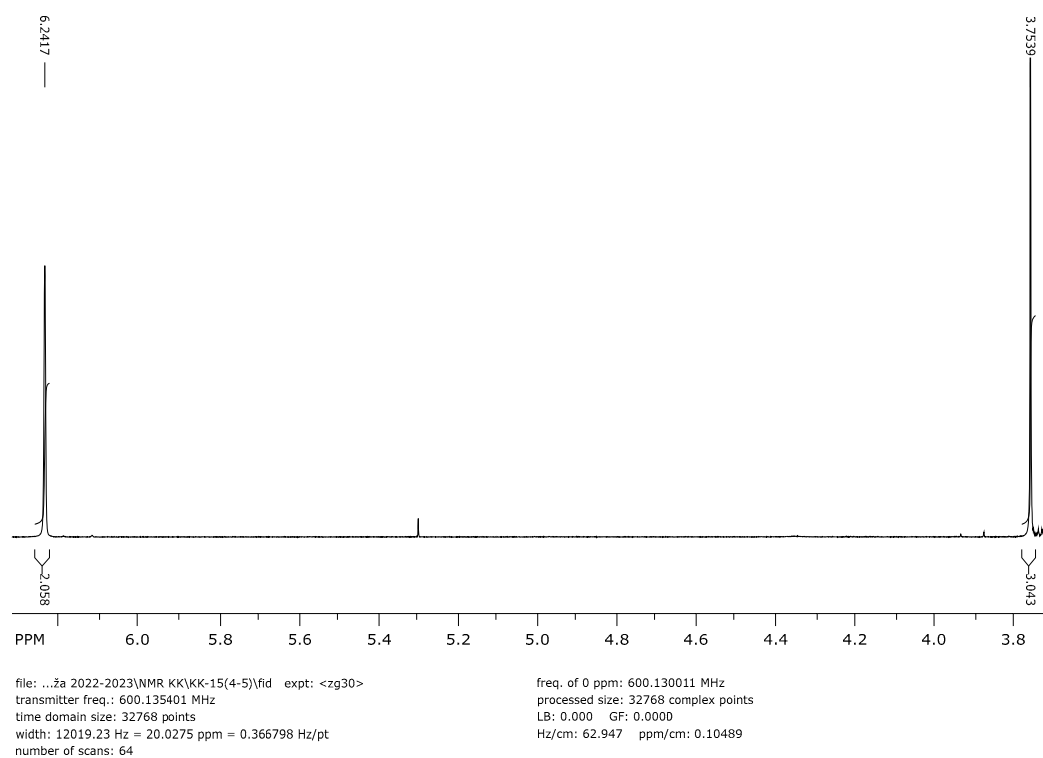

Figure S15.  $^1\text{H}$  NMR ( $\text{CDCl}_3$ ) spectrum of aliphatic part of **4**.

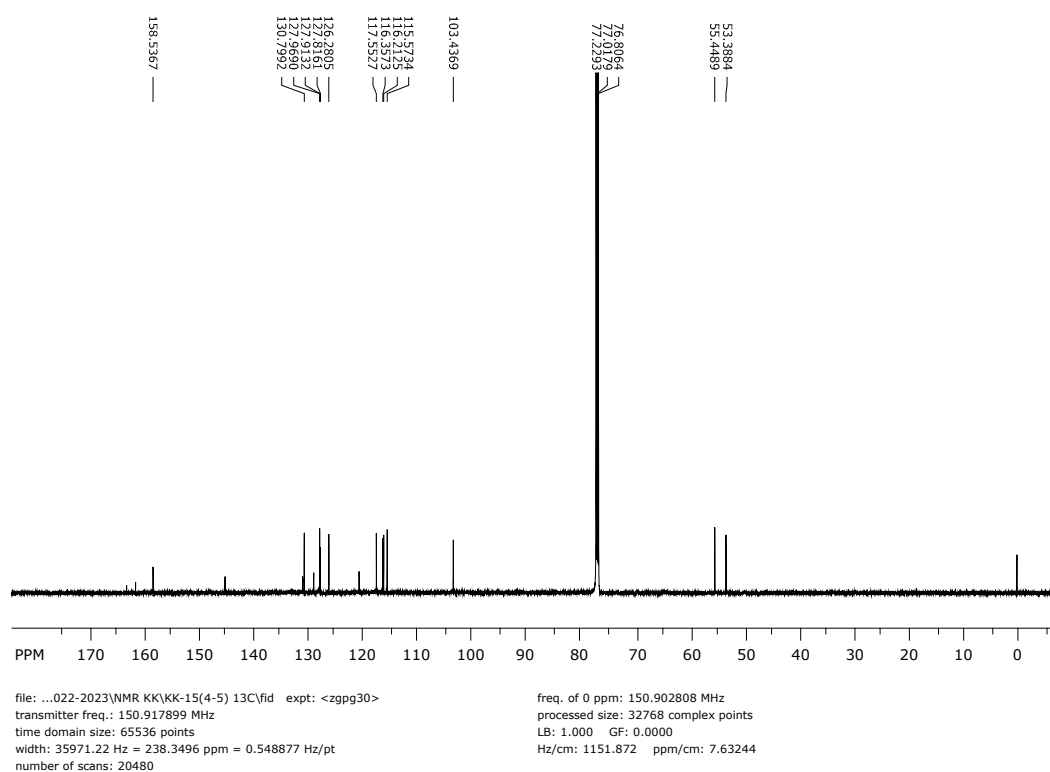

Figure S16.  $^{13}\text{C}$  NMR ( $\text{CDCl}_3$ ) spectrum of **4**.

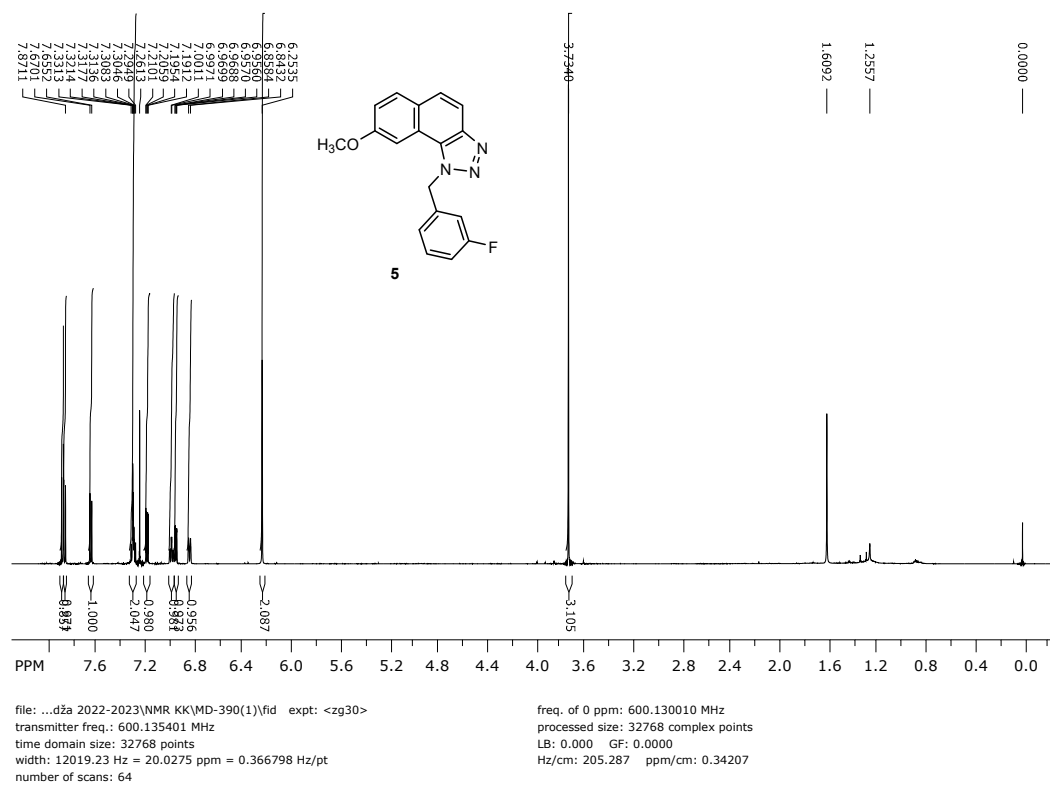

Figure S17.  $^1\text{H}$  NMR ( $\text{CDCl}_3$ ) spectrum of **5**.

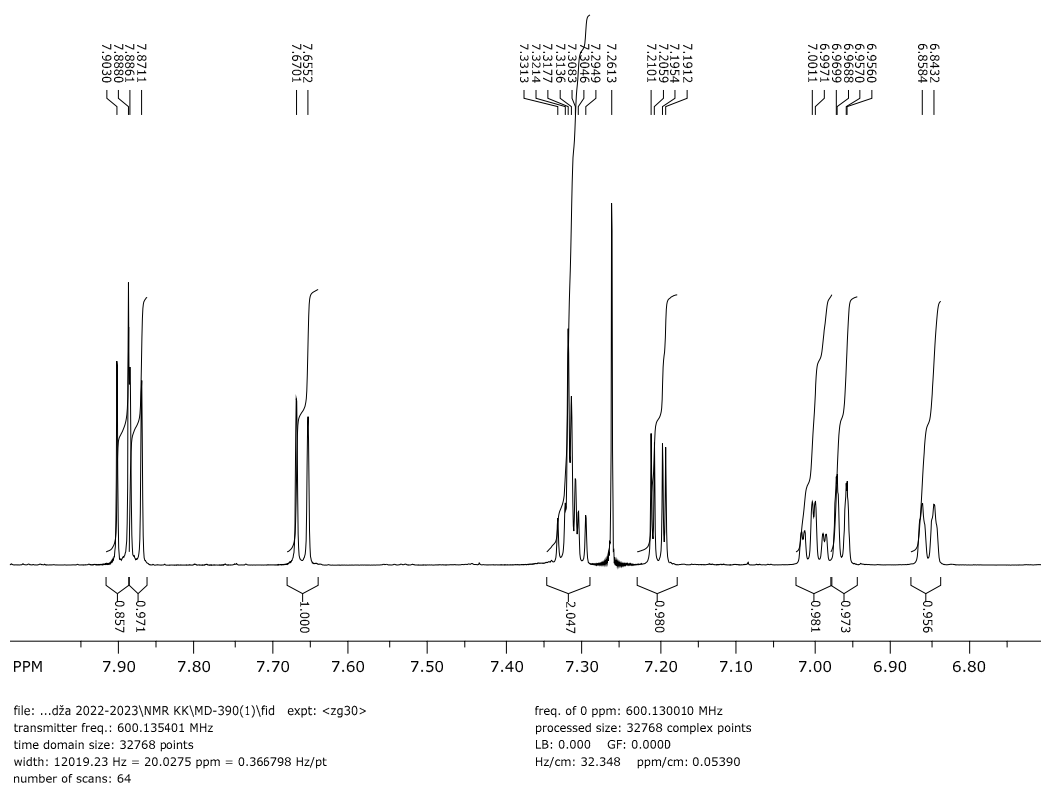

Figure S18.  $^1\text{H}$  NMR ( $\text{CDCl}_3$ ) spectrum of aromatic part of **5**.

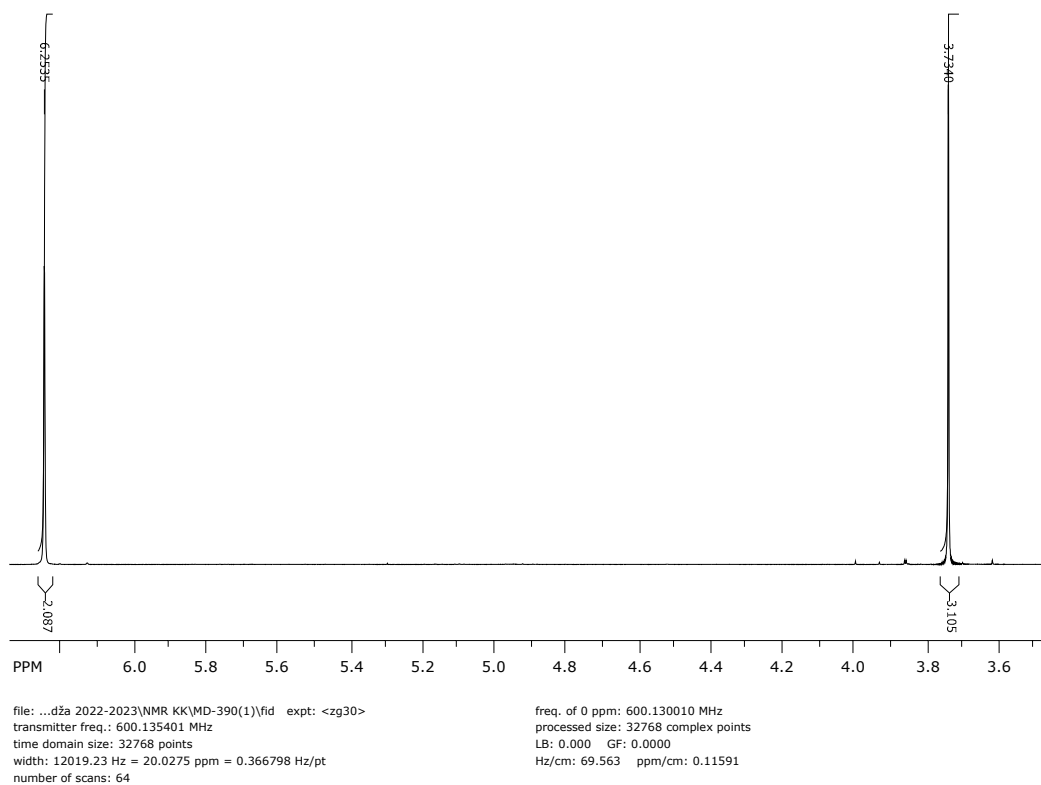

Figure S19.  $^1\text{H}$  NMR ( $\text{CDCl}_3$ ) spectrum of aliphatic part of **5**.

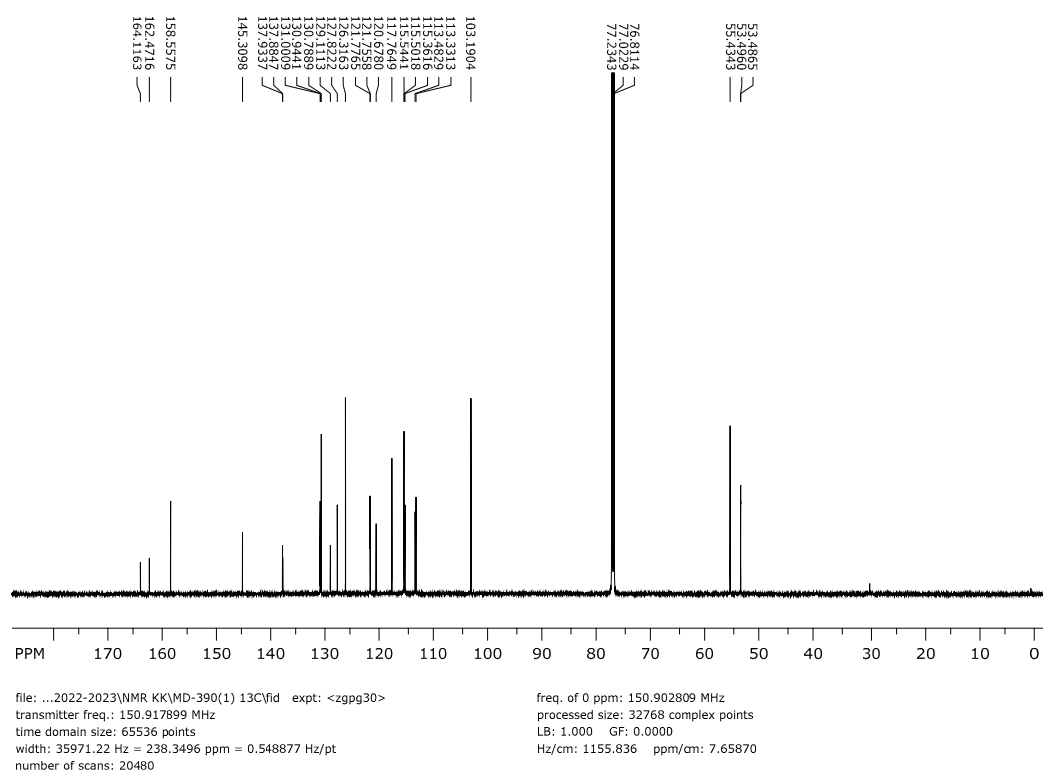

Figure S20.  $^{13}\text{C}$  NMR ( $\text{CDCl}_3$ ) spectrum of **5**.

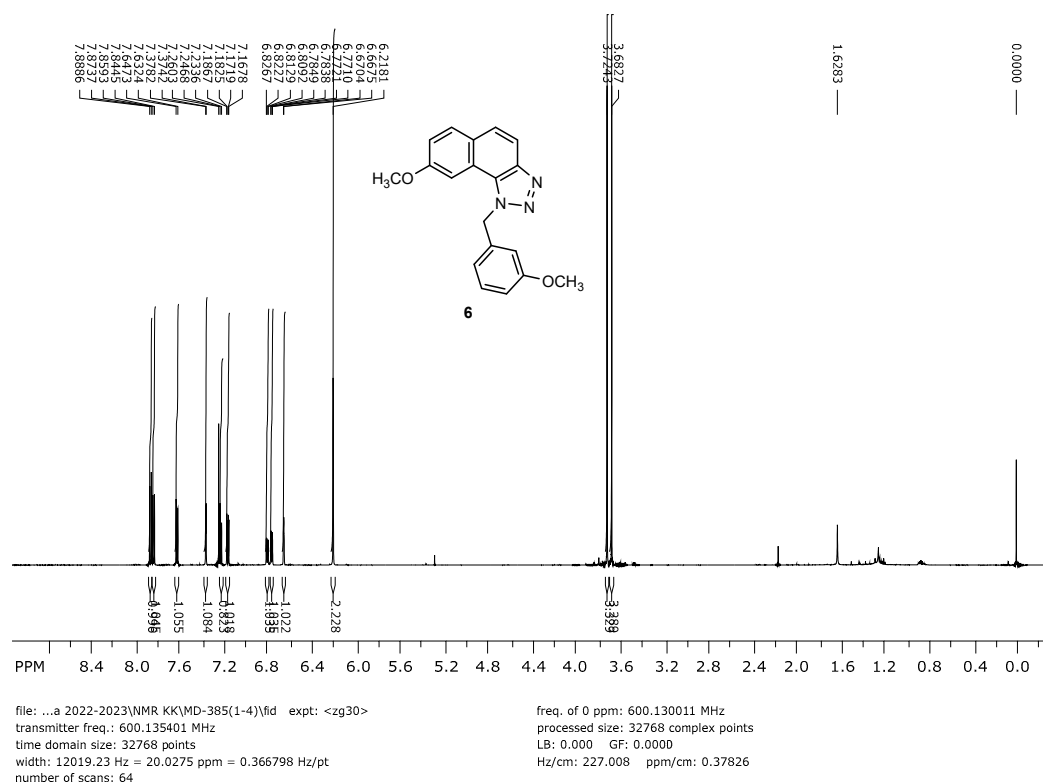

Figure S21.  $^1\text{H}$  NMR ( $\text{CDCl}_3$ ) spectrum of **6**.

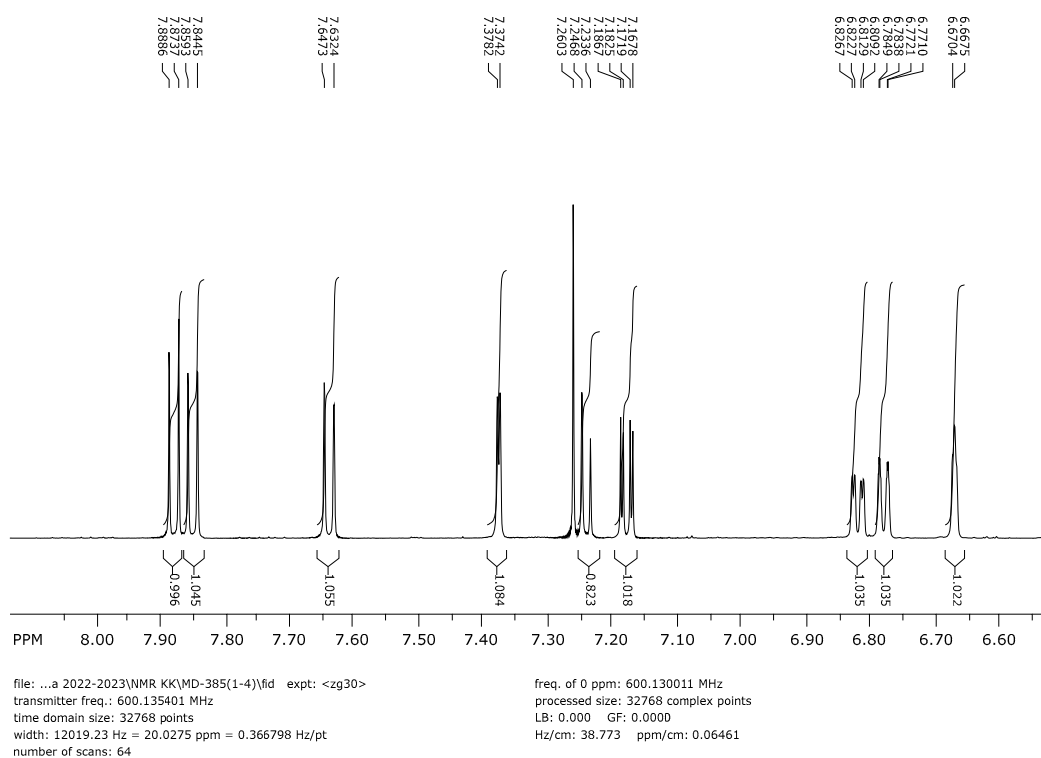

Figure S22.  $^1\text{H}$  NMR ( $\text{CDCl}_3$ ) spectrum of aromatic part of **6**.

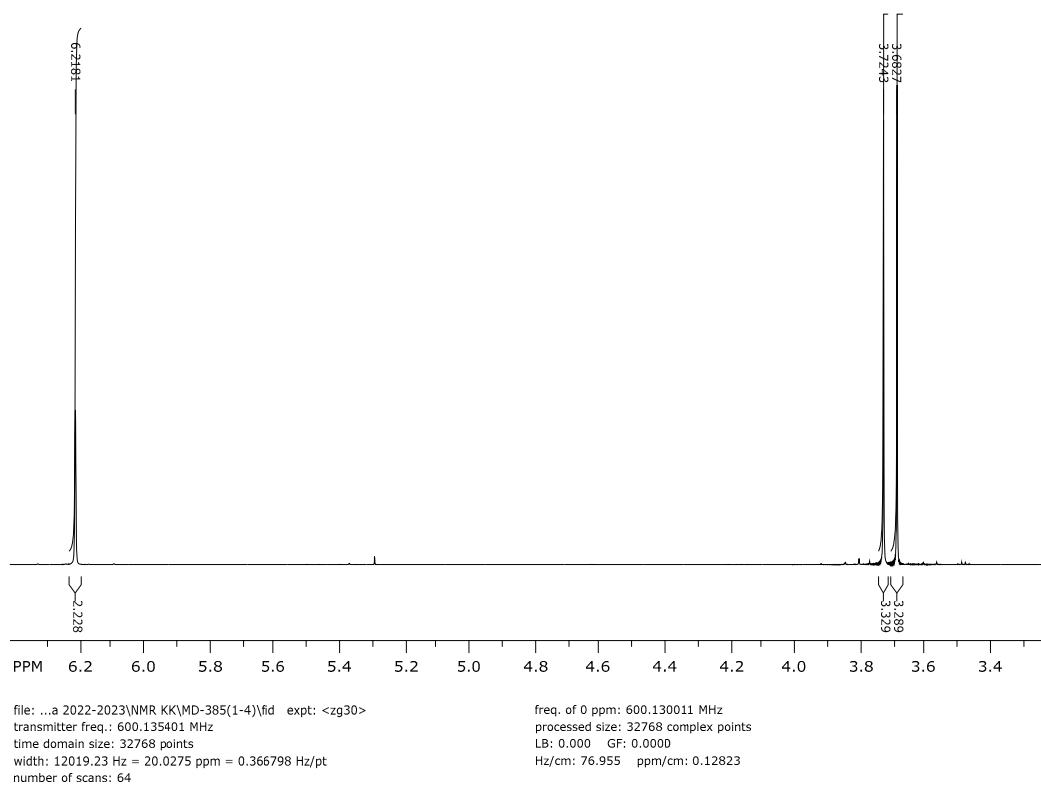

Figure S23.  $^1\text{H}$  NMR ( $\text{CDCl}_3$ ) spectrum of aliphatic part of **6**.



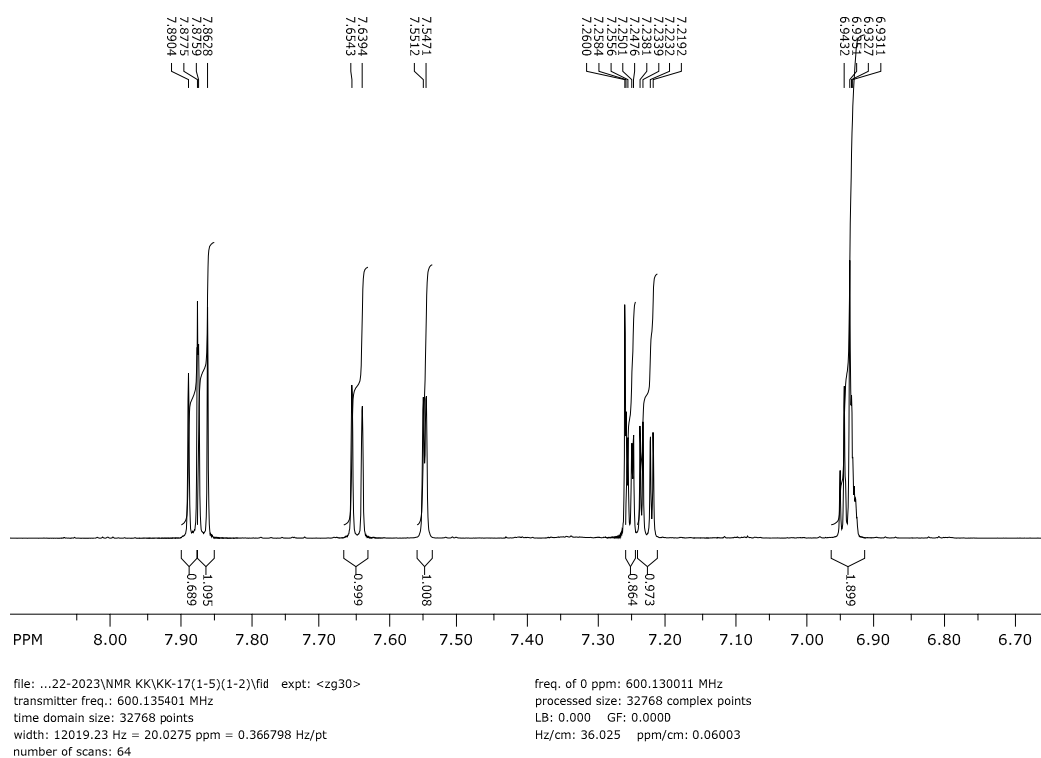

Figure S26.  $^1\text{H}$  NMR ( $\text{CDCl}_3$ ) spectrum of aromatic part of **7**.

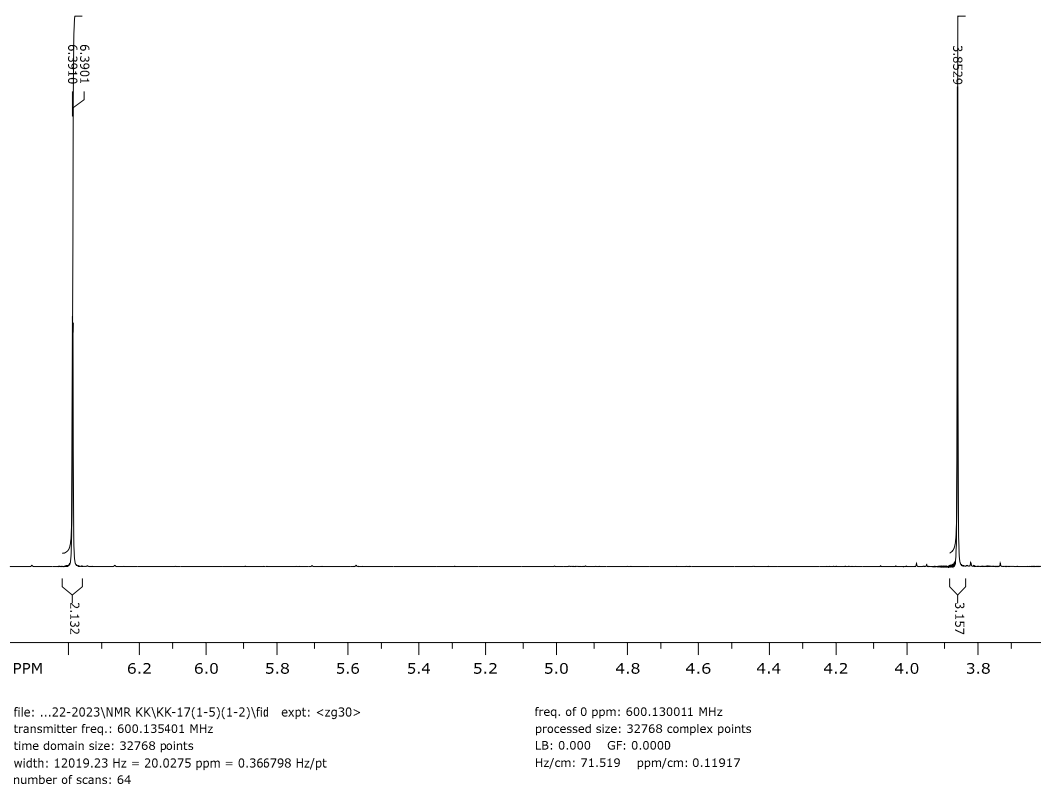

Figure S27.  $^1\text{H}$  NMR ( $\text{CDCl}_3$ ) spectrum of aliphatic part of **7**.

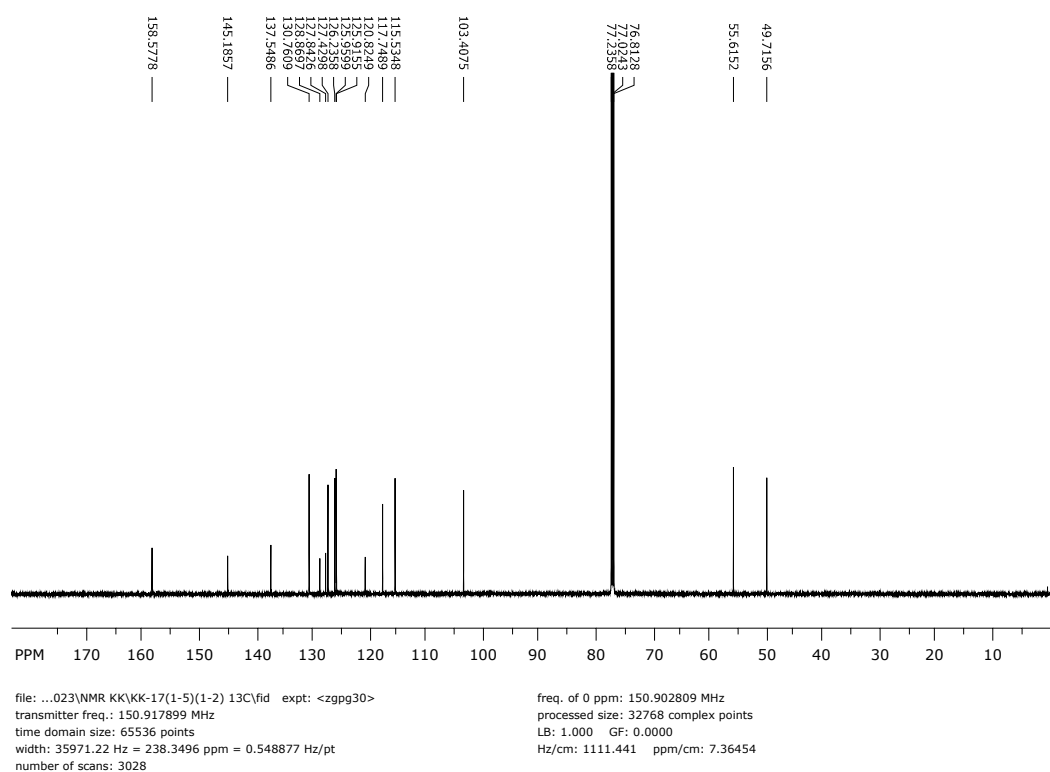

Figure S28.  $^{13}\text{C}$  NMR ( $\text{CDCl}_3$ ) spectrum of **7**.

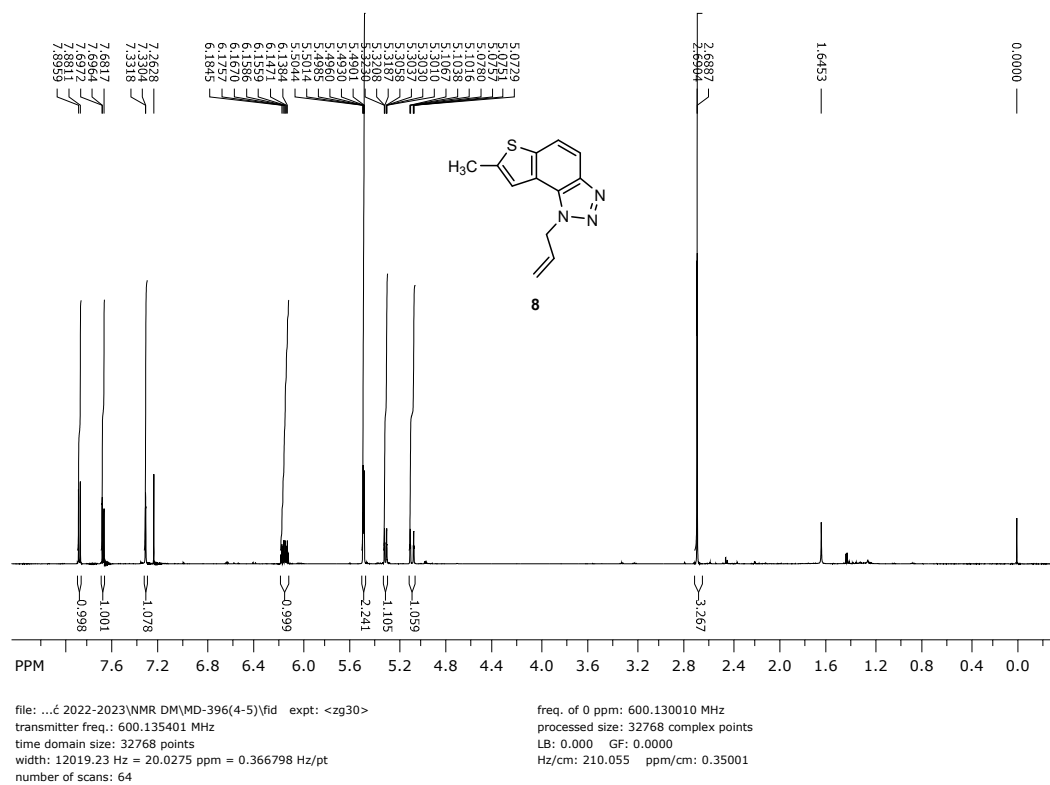

Figure S29.  $^1\text{H}$  NMR ( $\text{CDCl}_3$ ) spectrum of **8**.



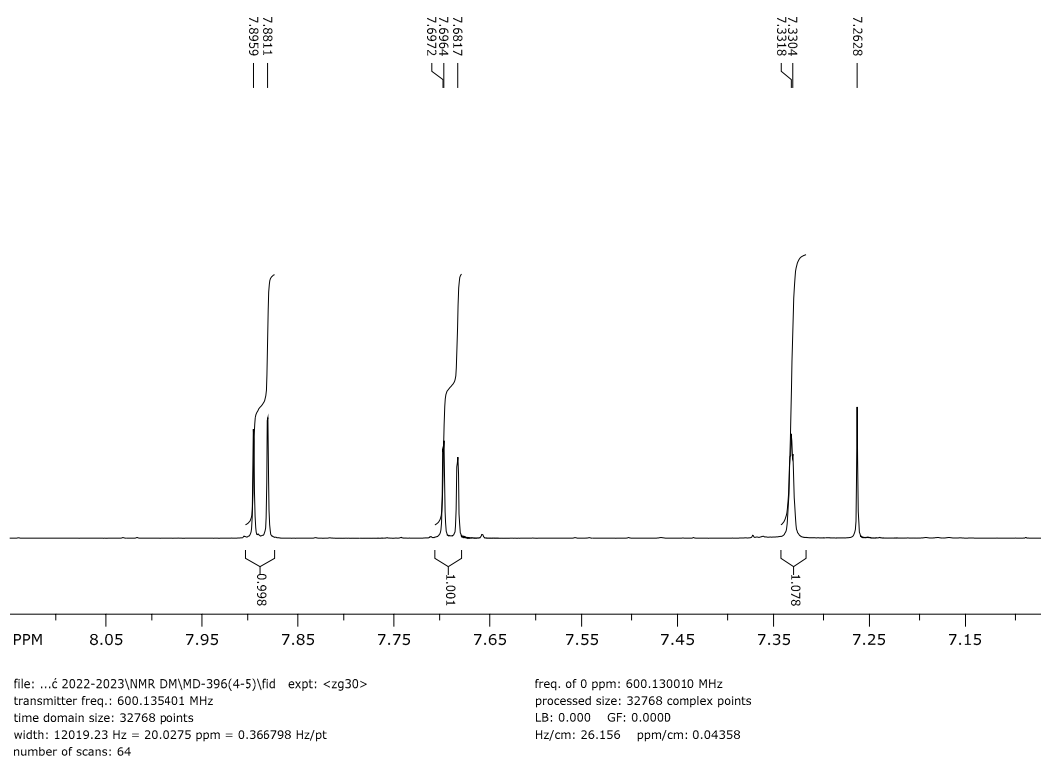

Figure S30.  $^1\text{H}$  NMR ( $\text{CDCl}_3$ ) spectrum of aromatic part of **8**.

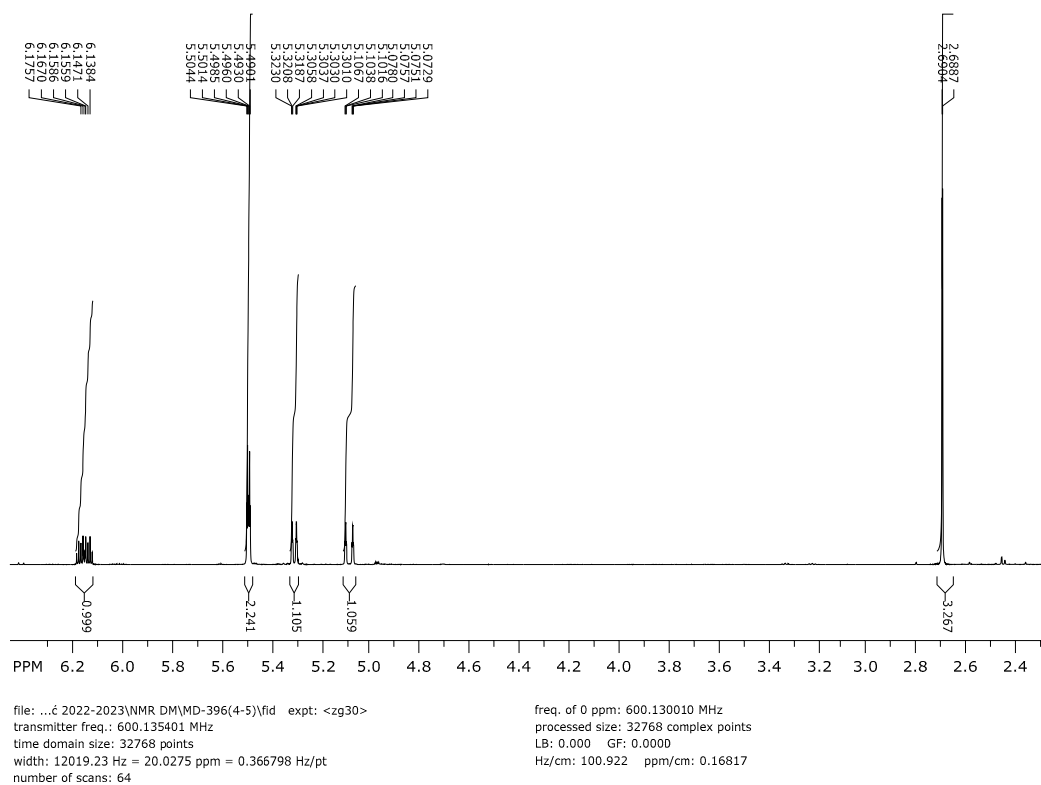

Figure S31.  $^1\text{H}$  NMR ( $\text{CDCl}_3$ ) spectrum of aliphatic part of **8**.

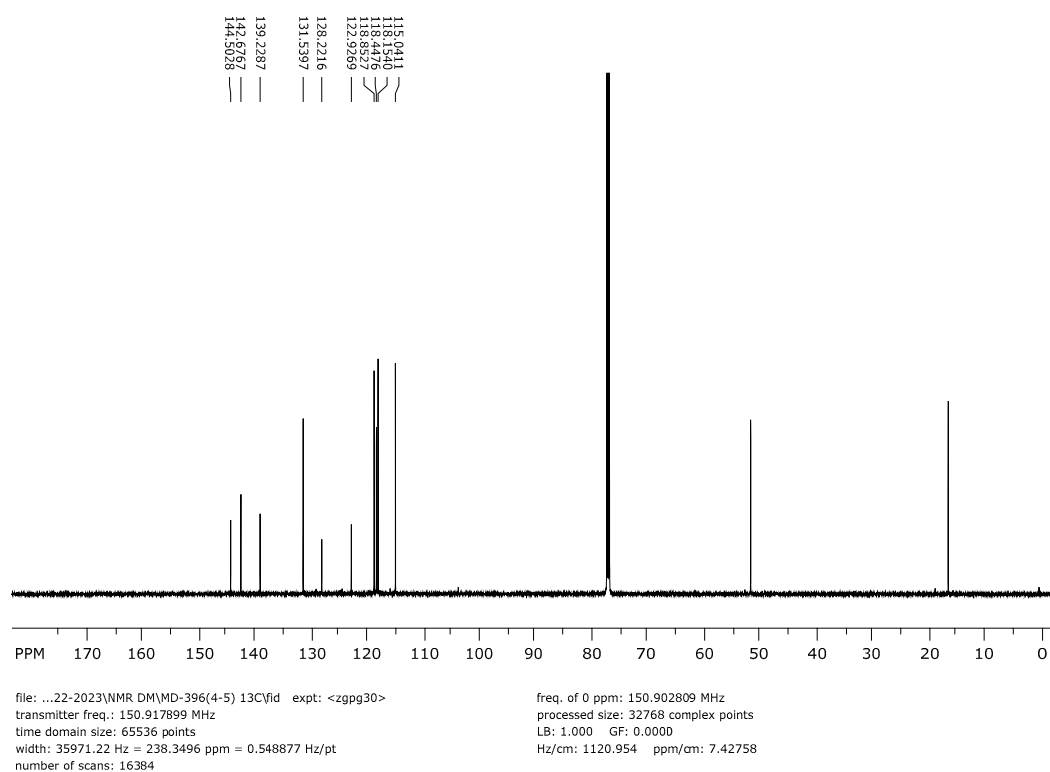

Figure S32.  $^{13}\text{C}$  NMR ( $\text{CDCl}_3$ ) spectrum of **8**.

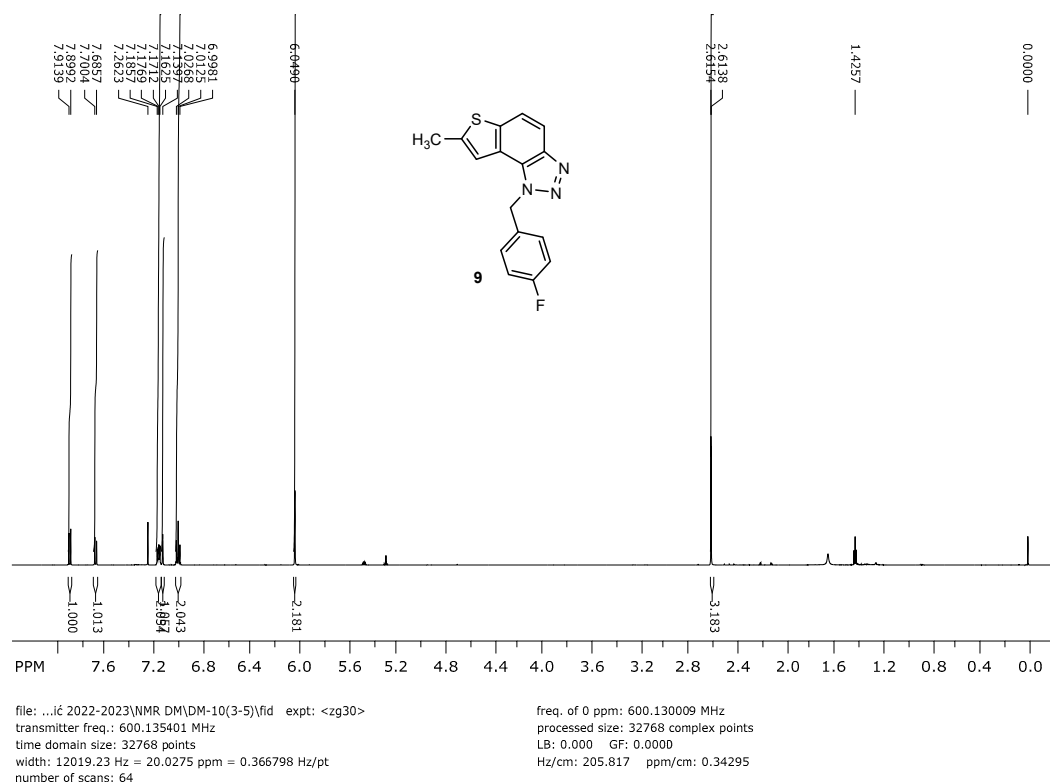

Figure S33.  $^1\text{H}$  NMR ( $\text{CDCl}_3$ ) spectrum of **9**.

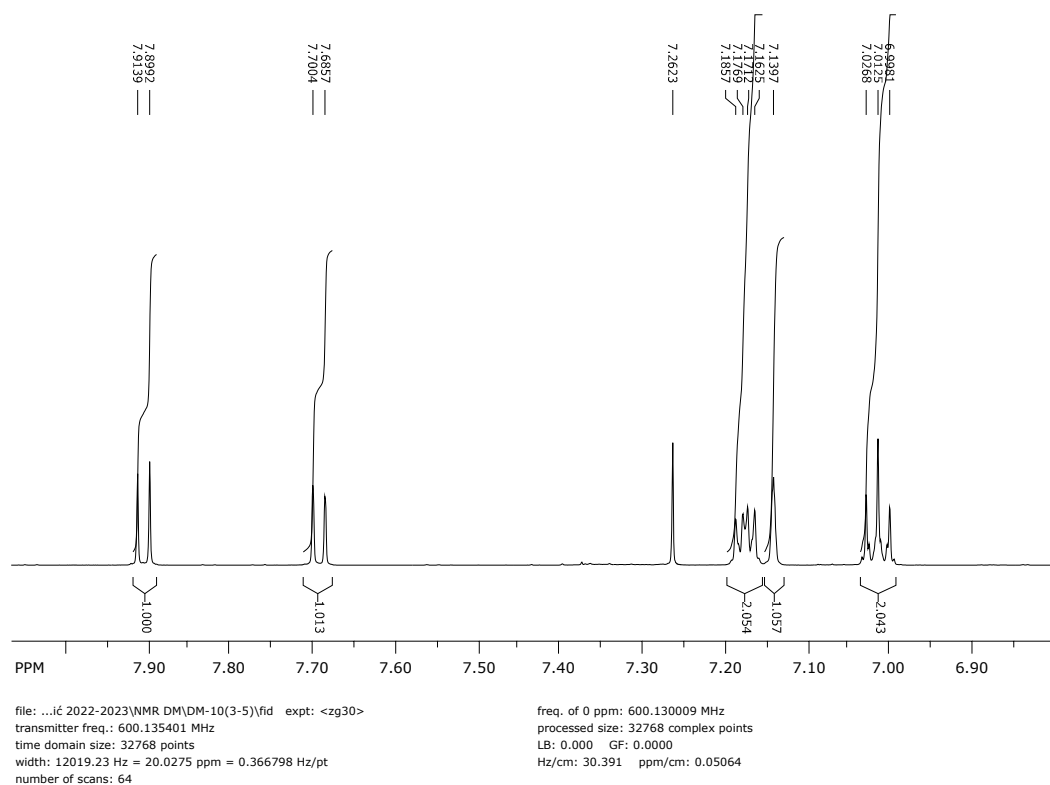

Figure S34.  $^1\text{H}$  NMR ( $\text{CDCl}_3$ ) spectrum of aromatic part of **9**.

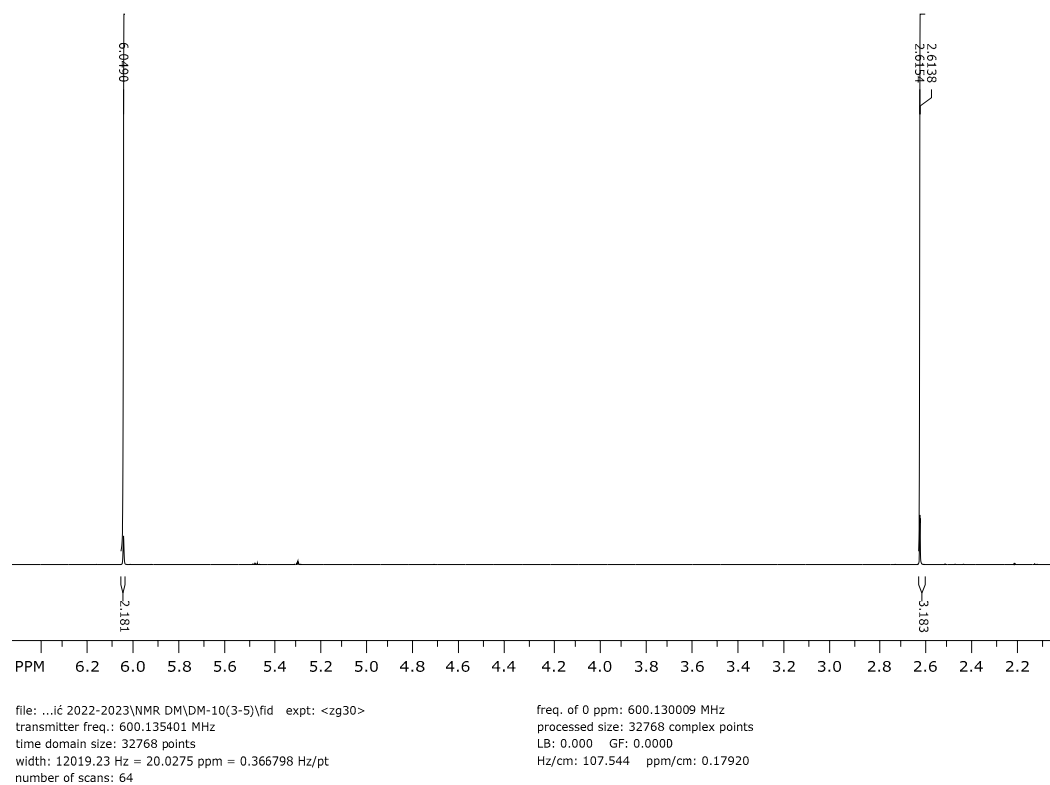

Figure S35.  $^1\text{H}$  NMR ( $\text{CDCl}_3$ ) spectrum of aliphatic part of **9**.



Figure S37.  $^1\text{H}$  NMR ( $\text{CDCl}_3$ ) spectrum of **10**.

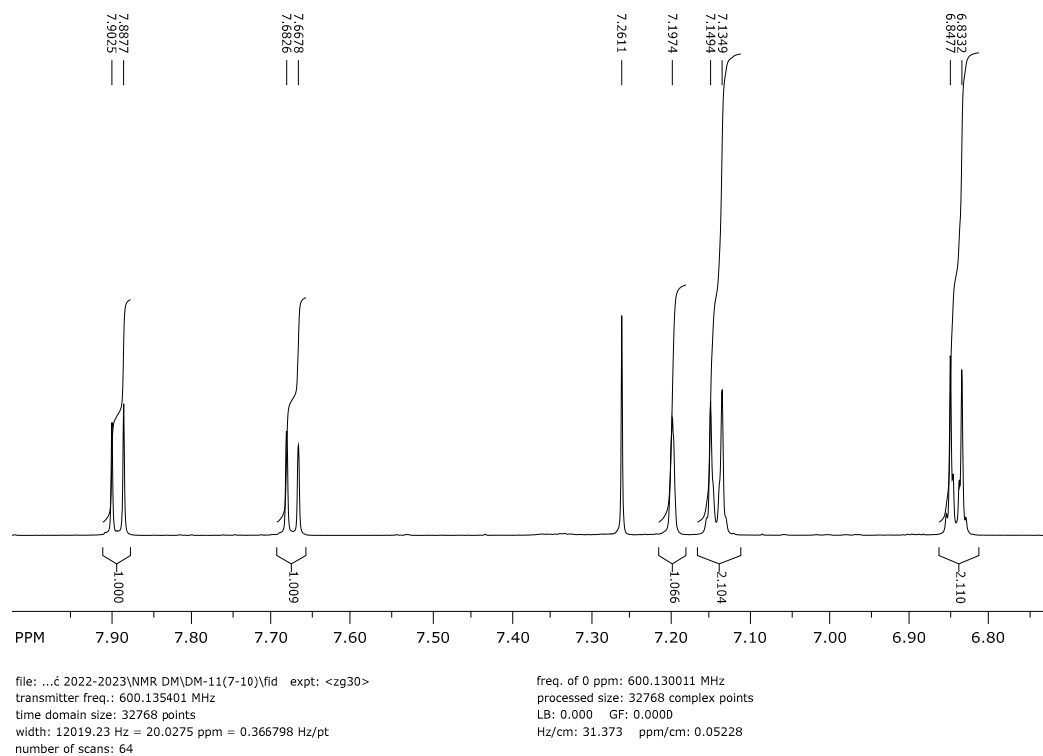

Figure S38.  $^1\text{H}$  NMR ( $\text{CDCl}_3$ ) spectrum of aromatic part of **10**.

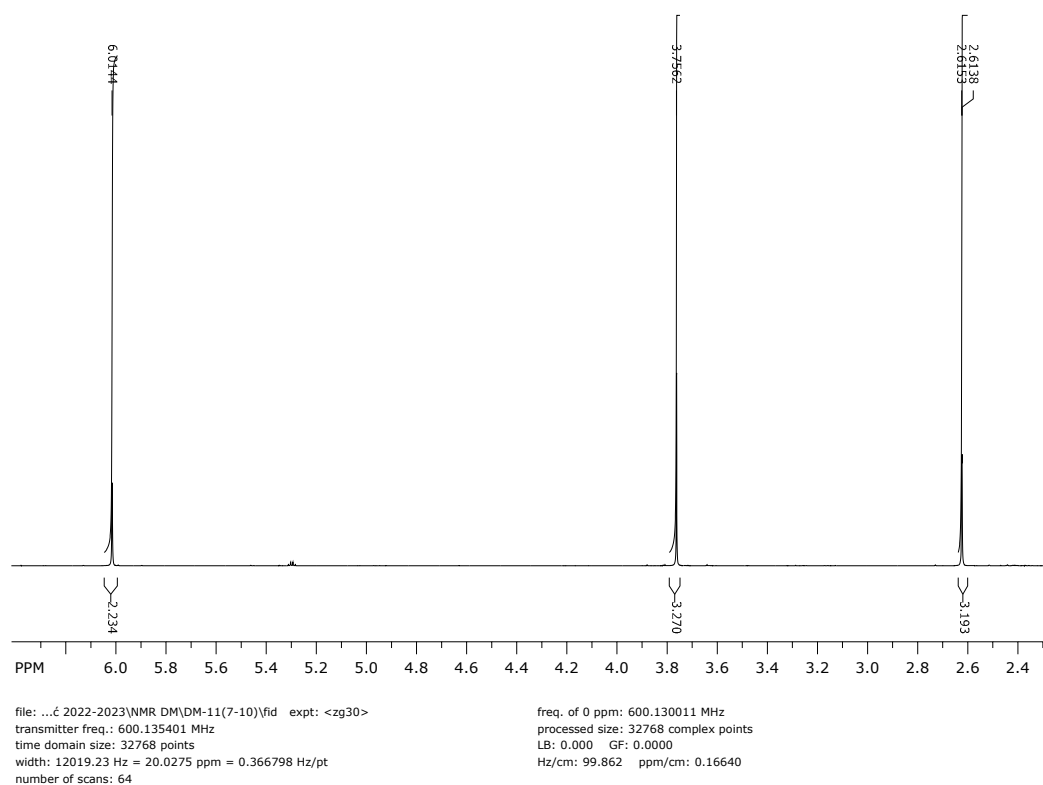

Figure S39.  $^1\text{H}$  NMR ( $\text{CDCl}_3$ ) spectrum of aliphatic part of **10**.

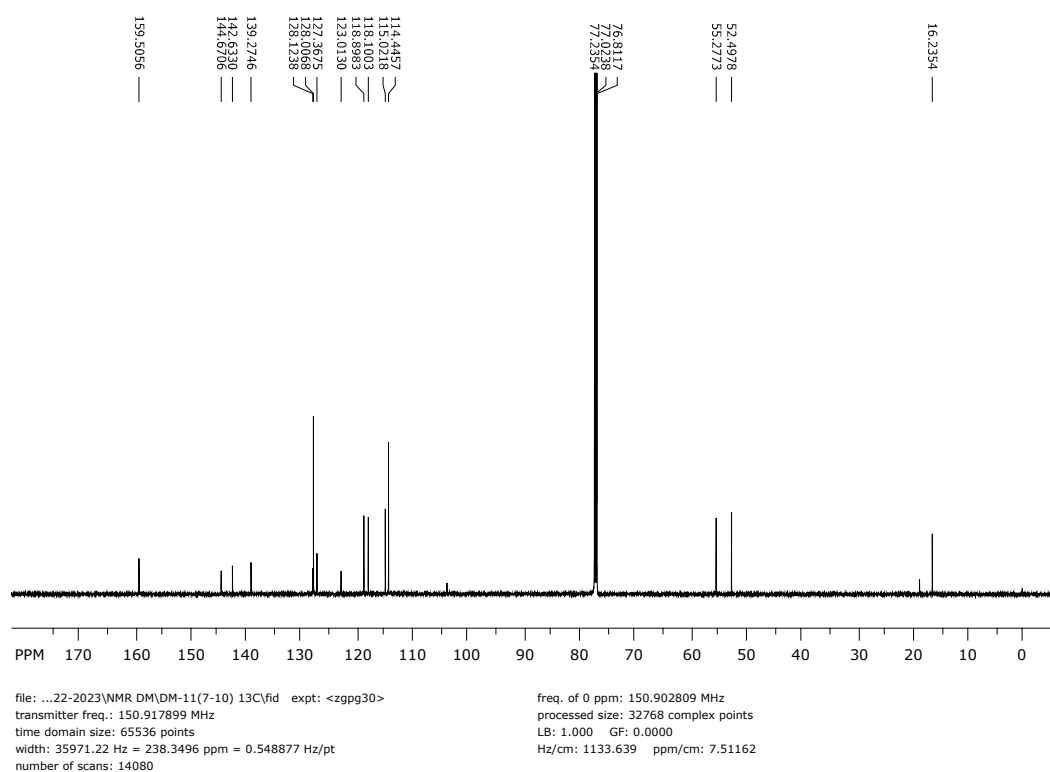

Figure S40.  $^{13}\text{C}$  NMR ( $\text{CDCl}_3$ ) spectrum of **10**.

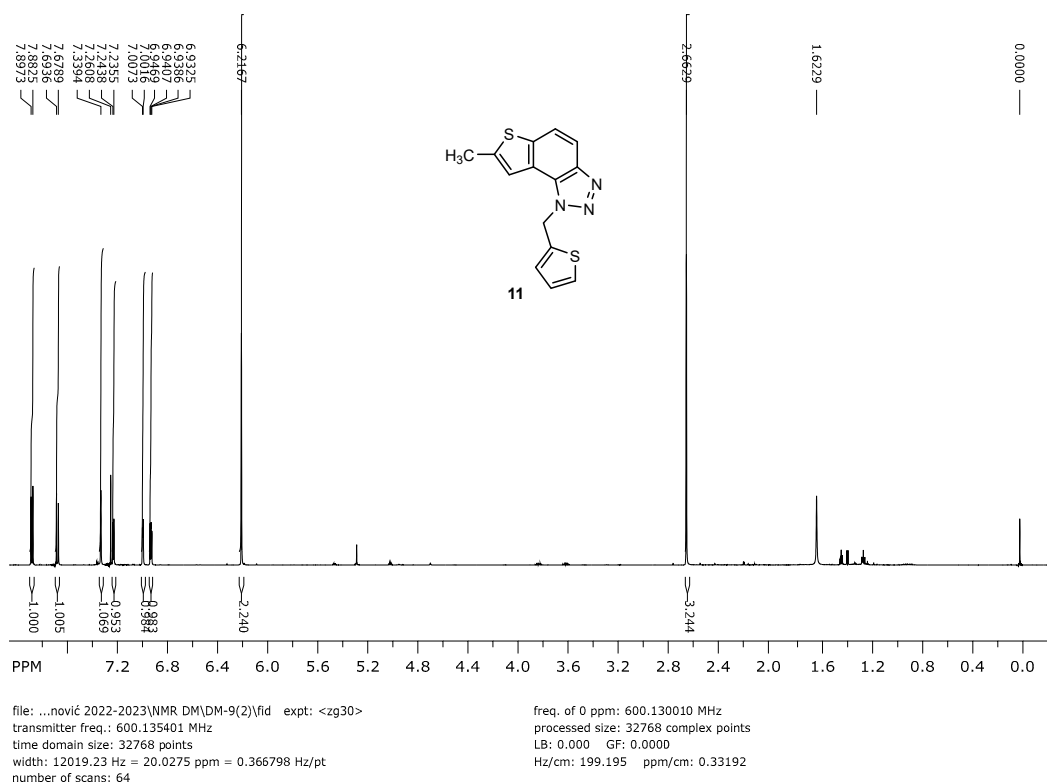

Figure S41.  $^1\text{H}$  NMR ( $\text{CDCl}_3$ ) spectrum of **11**.

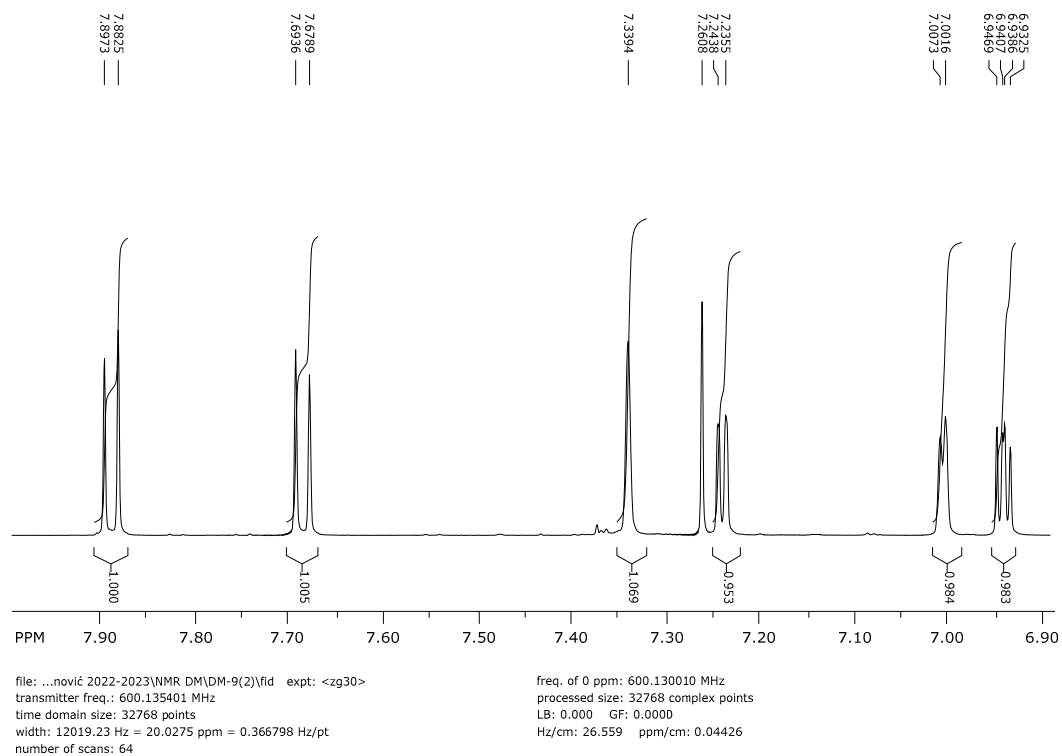

Figure S42.  $^1\text{H}$  NMR ( $\text{CDCl}_3$ ) spectrum of aromatic part of **11**.

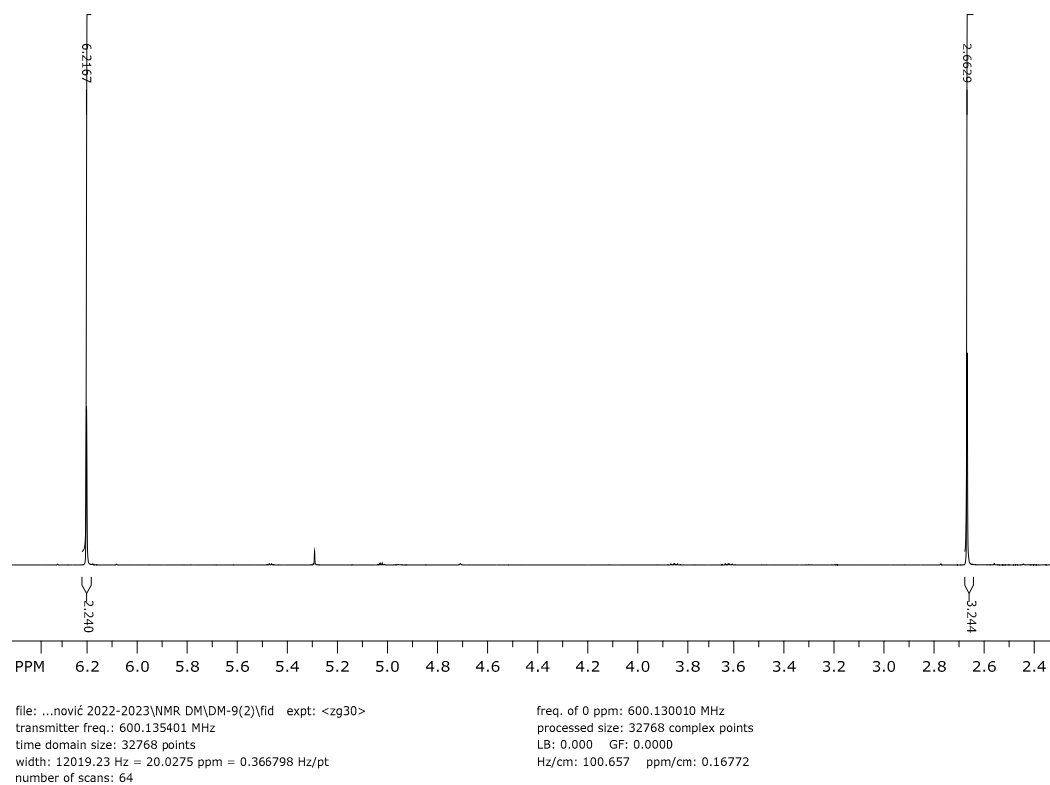

Figure S43.  $^1\text{H}$  NMR ( $\text{CDCl}_3$ ) spectrum of aliphatic part of **11**.

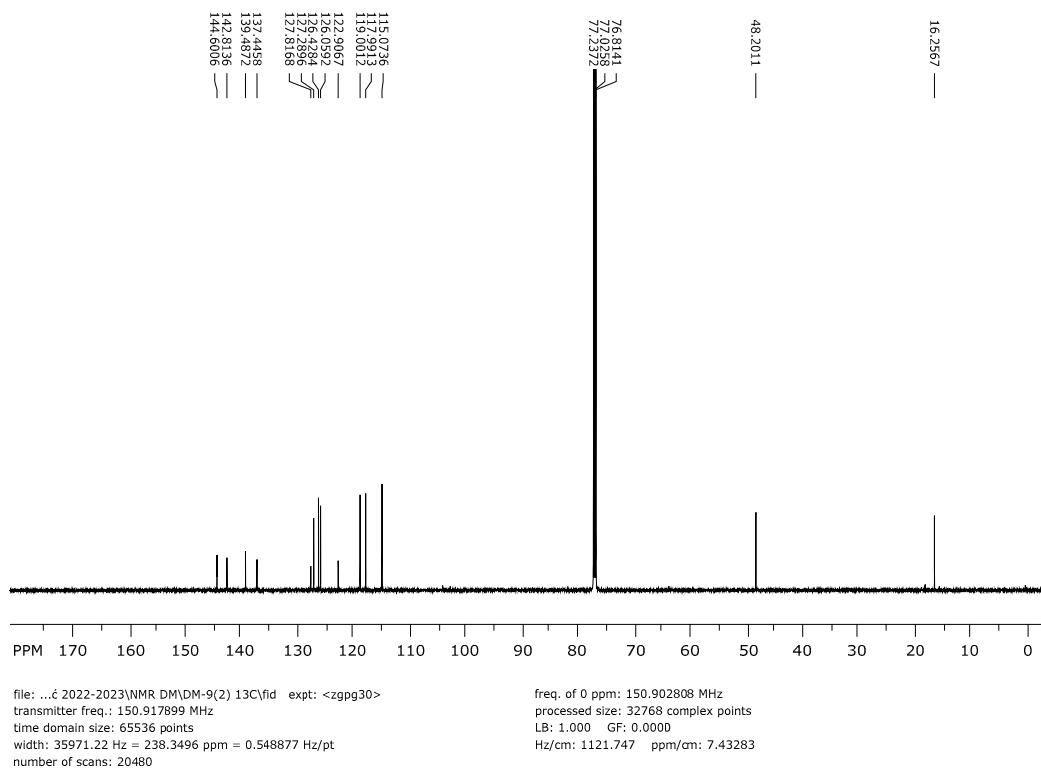

Figure S44.  $^{13}\text{C}$  NMR ( $\text{CDCl}_3$ ) spectrum of **11**.

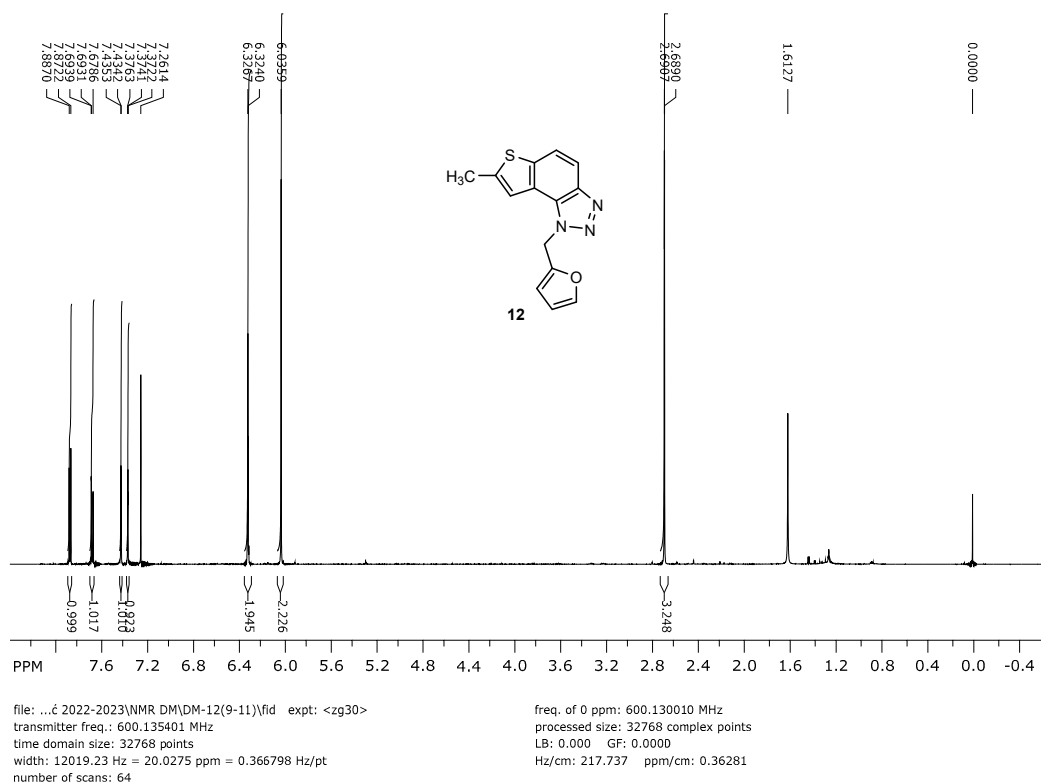



Figure S45.  $^1\text{H}$  NMR ( $\text{CDCl}_3$ ) spectrum of **12**.

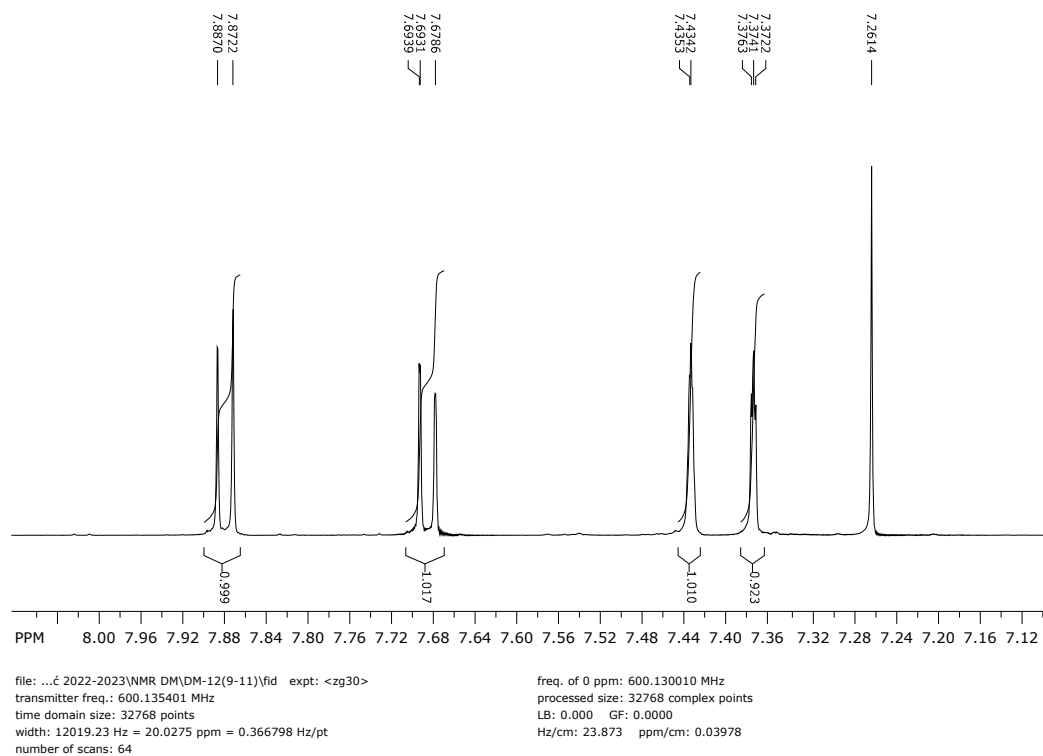

Figure S46.  $^1\text{H}$  NMR ( $\text{CDCl}_3$ ) spectrum of aromatic part of **12**.

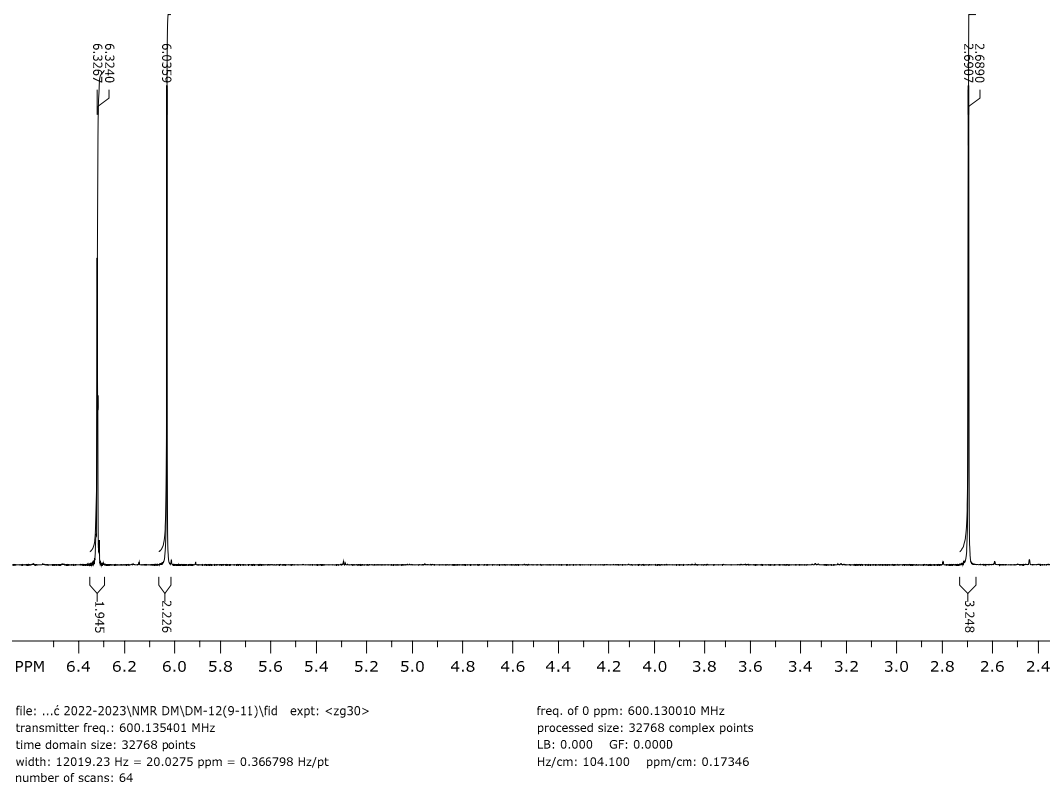

Figure S47.  $^1\text{H}$  NMR ( $\text{CDCl}_3$ ) spectrum of aliphatic part of **12**.

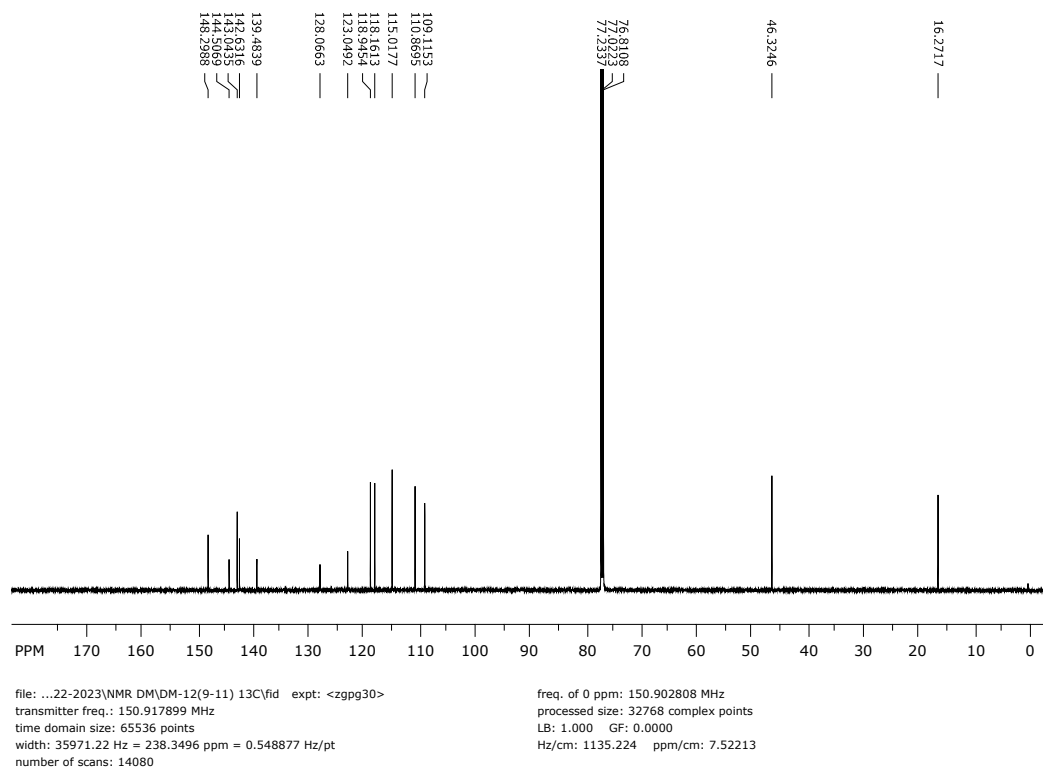

Figure S48.  $^{13}\text{C}$  NMR ( $\text{CDCl}_3$ ) spectrum of **12**.

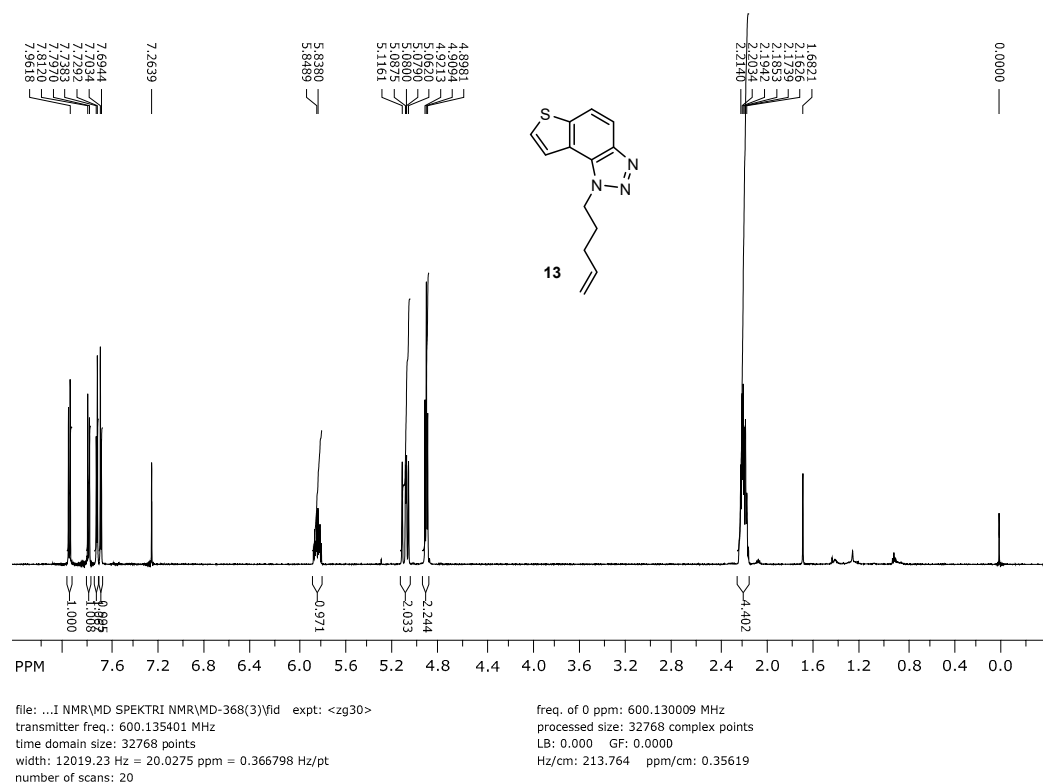

Figure S49.  $^1\text{H}$  NMR ( $\text{CDCl}_3$ ) spectrum of **13**.

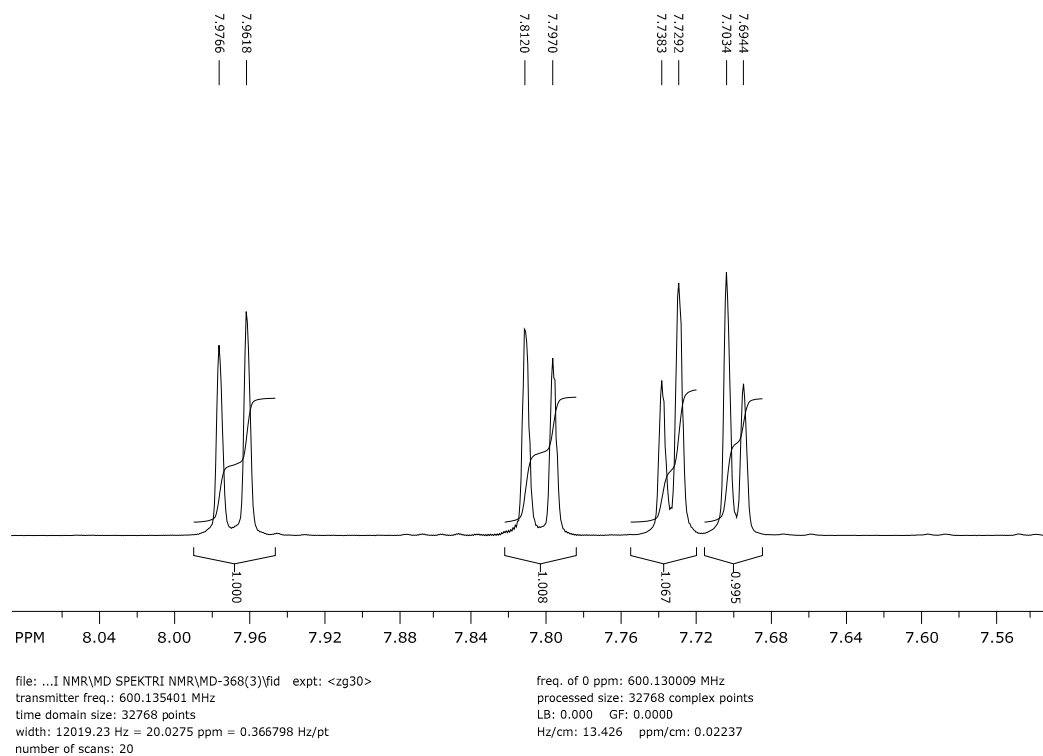

Figure S50.  $^1\text{H}$  NMR ( $\text{CDCl}_3$ ) spectrum of aromatic part of **13**.

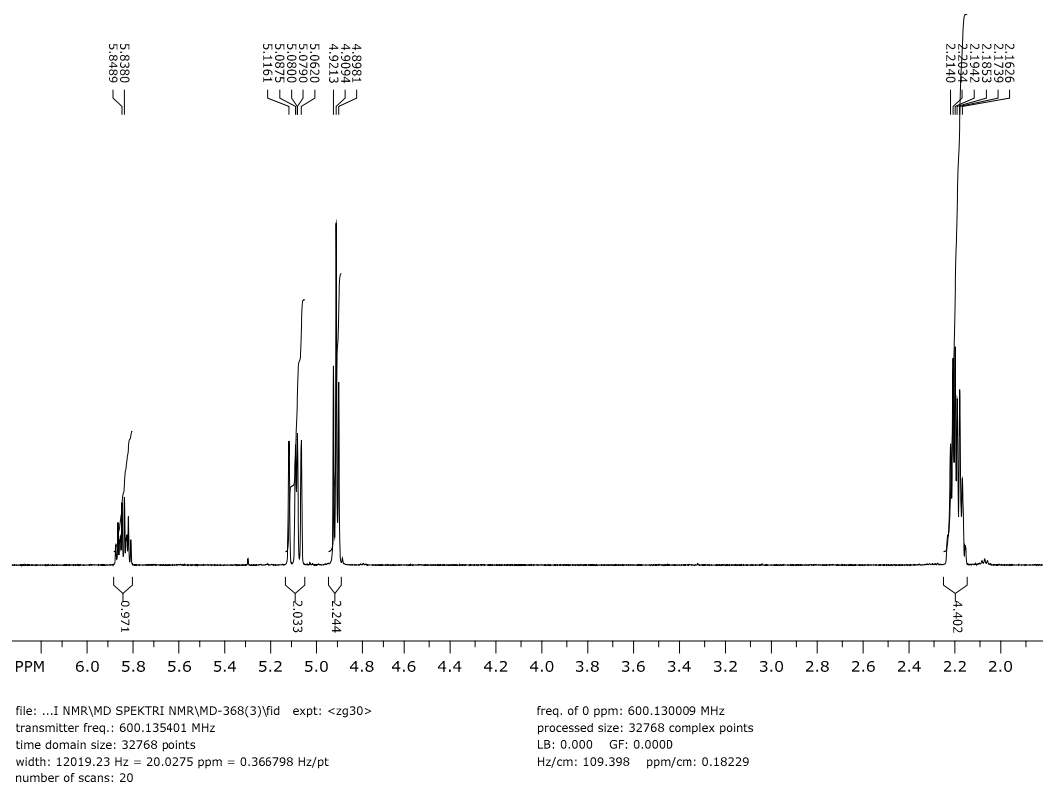

Figure S51.  $^1\text{H}$  NMR ( $\text{CDCl}_3$ ) spectrum of aliphatic part of **13**.

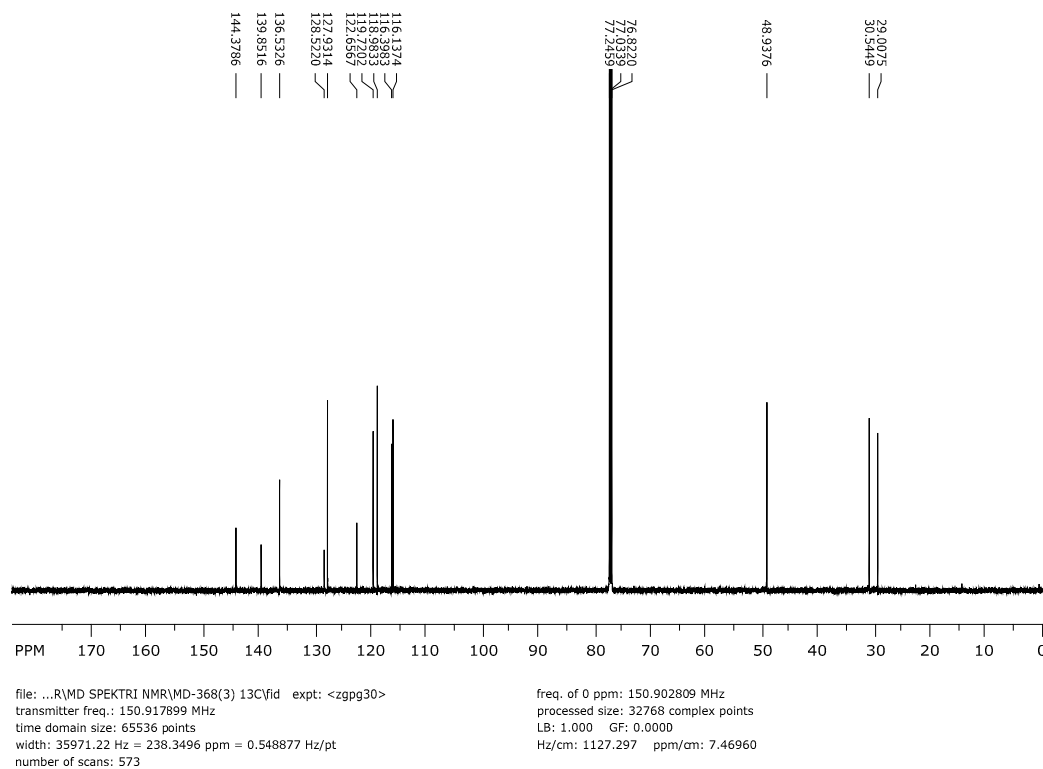

Figure S52.  $^{13}\text{C}$  NMR ( $\text{CDCl}_3$ ) spectrum of **13**.

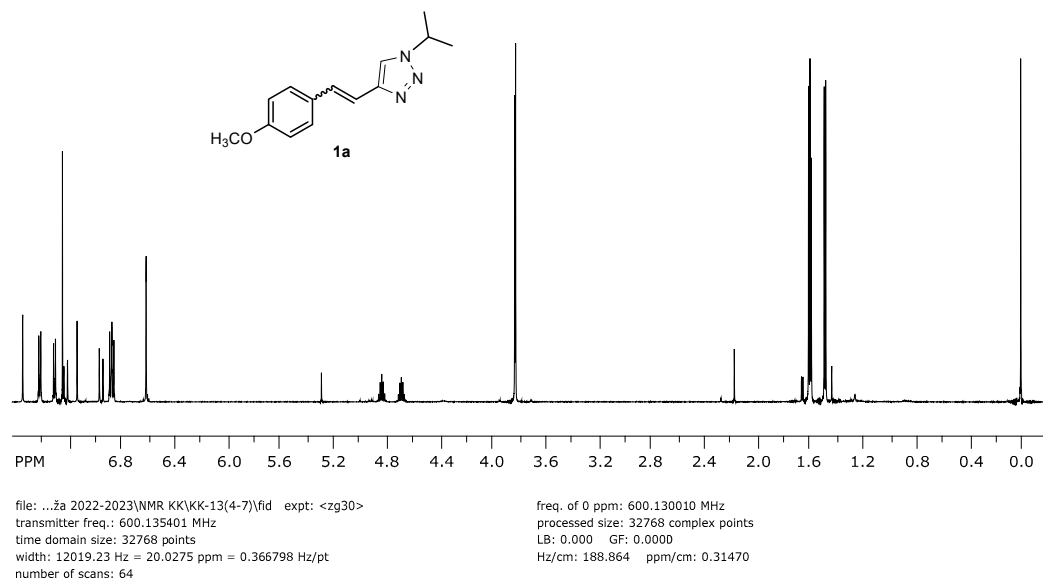

Figure S53.  $^1\text{H}$  NMR ( $\text{CDCl}_3$ ) spectrum of **1a** (mixture of *cis/trans*-isomers).

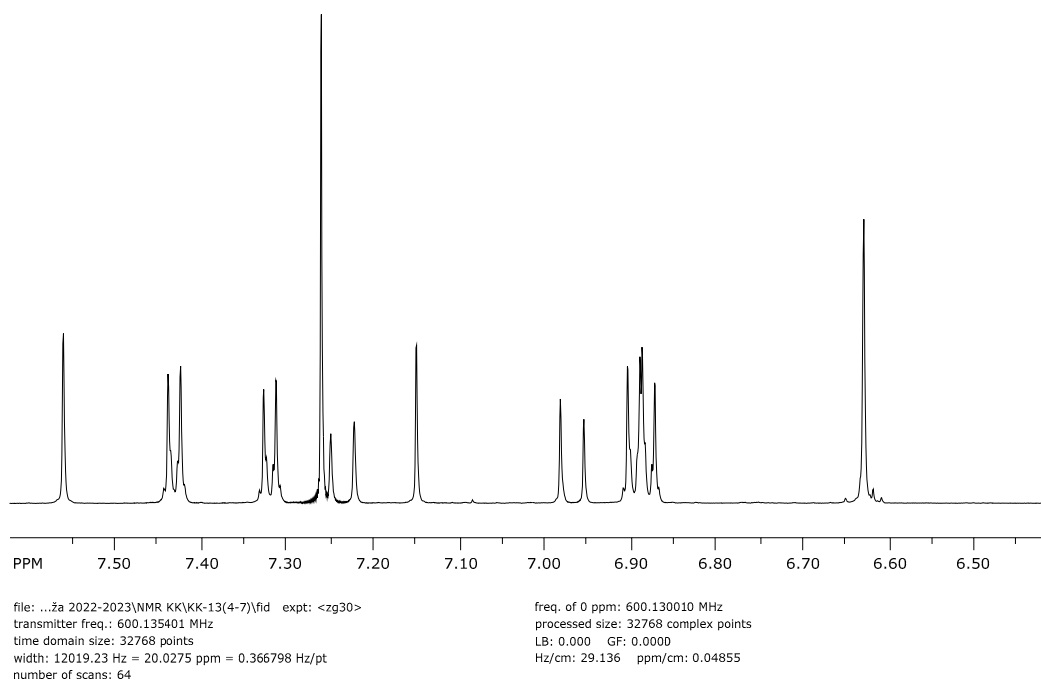

Figure S54.  $^1\text{H}$  NMR ( $\text{CDCl}_3$ ) spectrum of aromatic part (mixture of *cis/trans*-isomers) of **1a**.

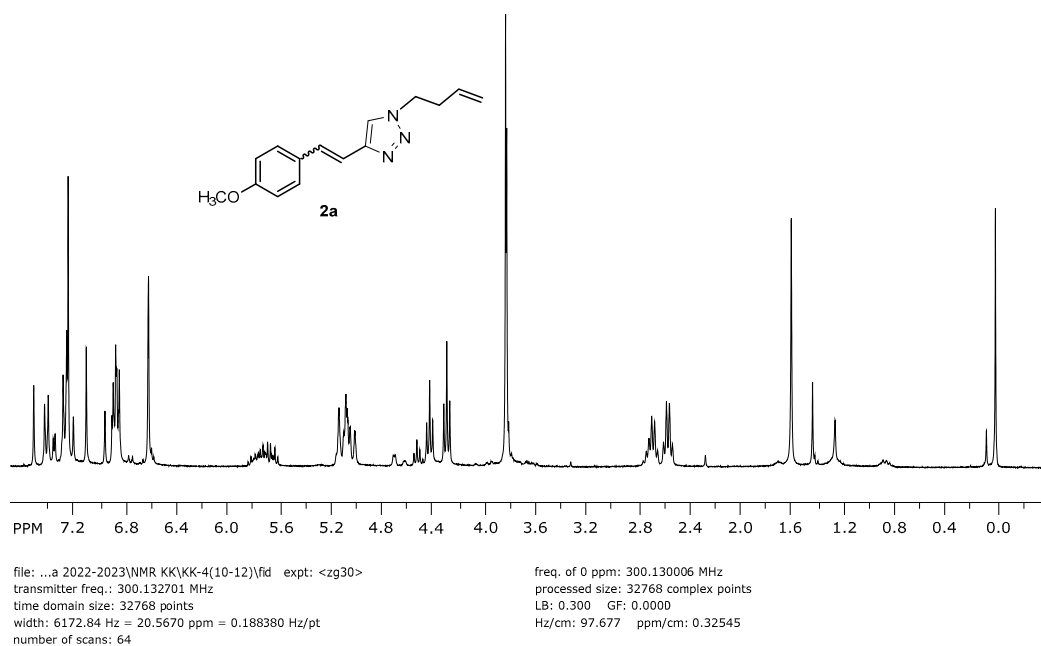

Figure S55.  $^1\text{H}$  NMR ( $\text{CDCl}_3$ ) spectrum of **2a** (mixture of *cis/trans*-isomers).

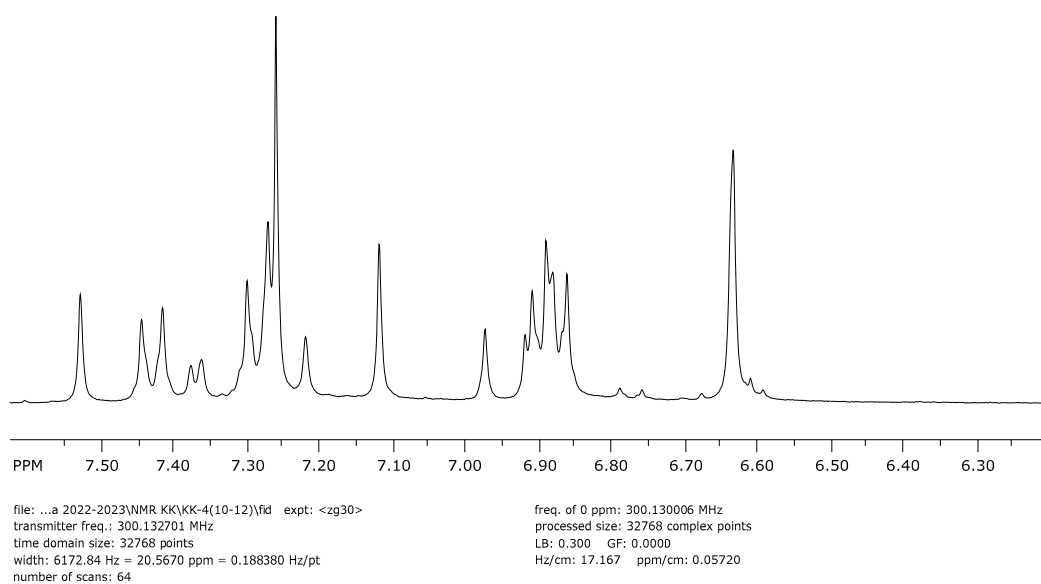

Figure S56.  $^1\text{H}$  NMR ( $\text{CDCl}_3$ ) spectrum of aromatic part (mixture of *cis/trans*-isomers) of **2a**.

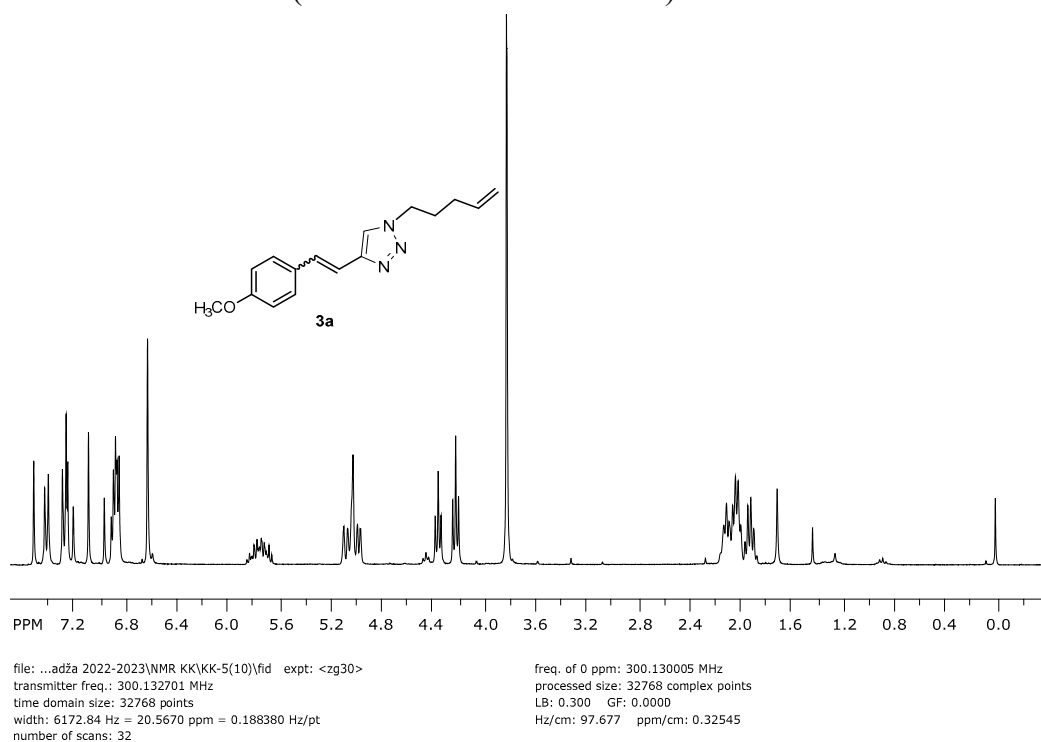

Figure S57.  $^1\text{H}$  NMR ( $\text{CDCl}_3$ ) spectrum of **3a** (mixture of *cis/trans*-isomers).

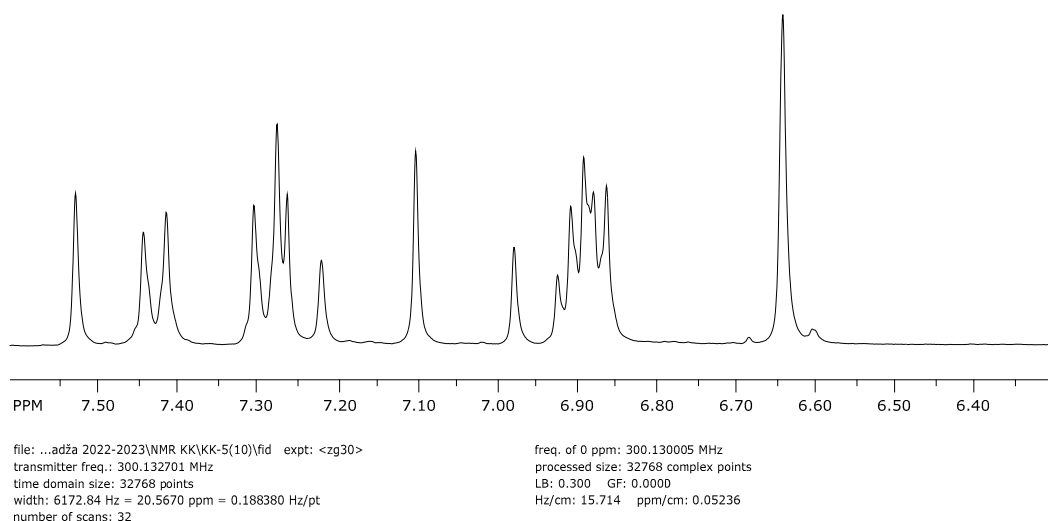

Figure S58.  $^1\text{H}$  NMR ( $\text{CDCl}_3$ ) spectrum of aromatic part (mixture of *cis/trans*-isomers) of **3a**.

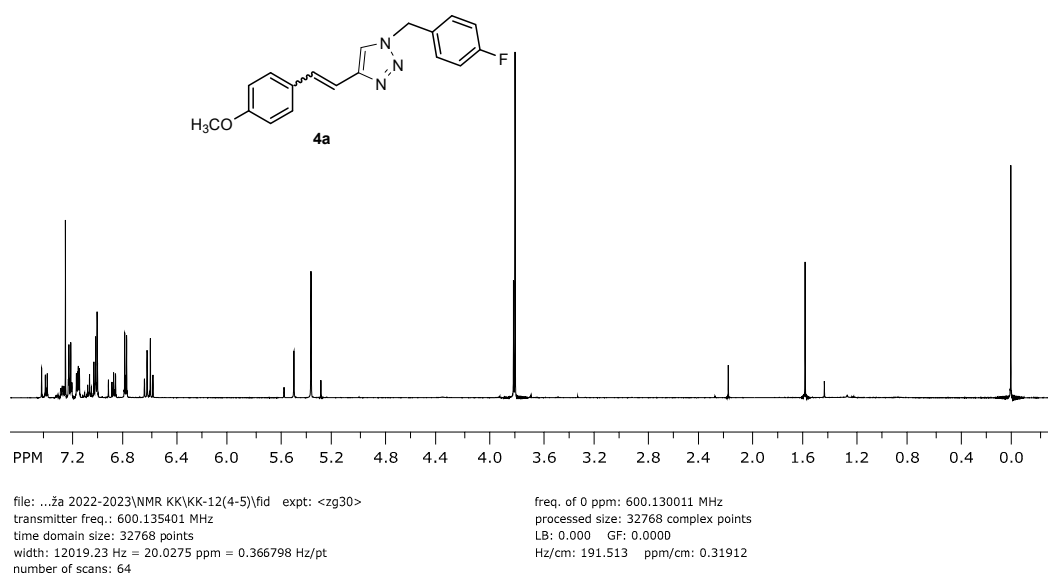

Figure S59.  $^1\text{H}$  NMR ( $\text{CDCl}_3$ ) spectrum of **4a** (mixture of *cis/trans*-isomers).

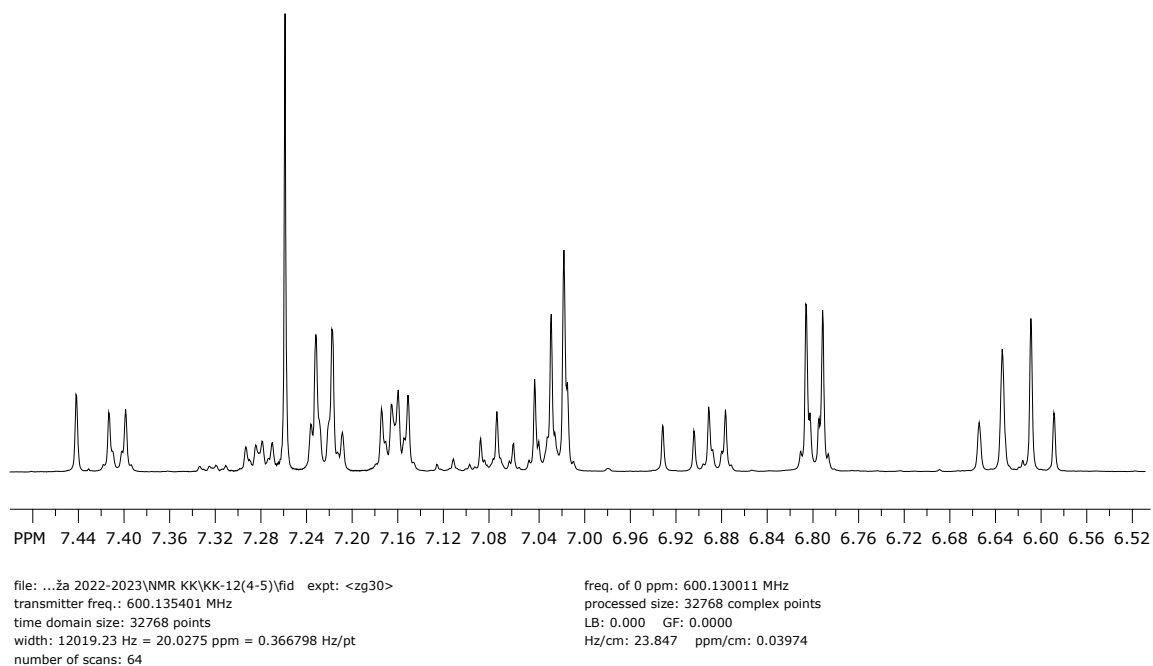

Figure S60.  $^1\text{H}$  NMR ( $\text{CDCl}_3$ ) spectrum of aromatic part (mixture of *cis/trans*-isomers) of **4a**.

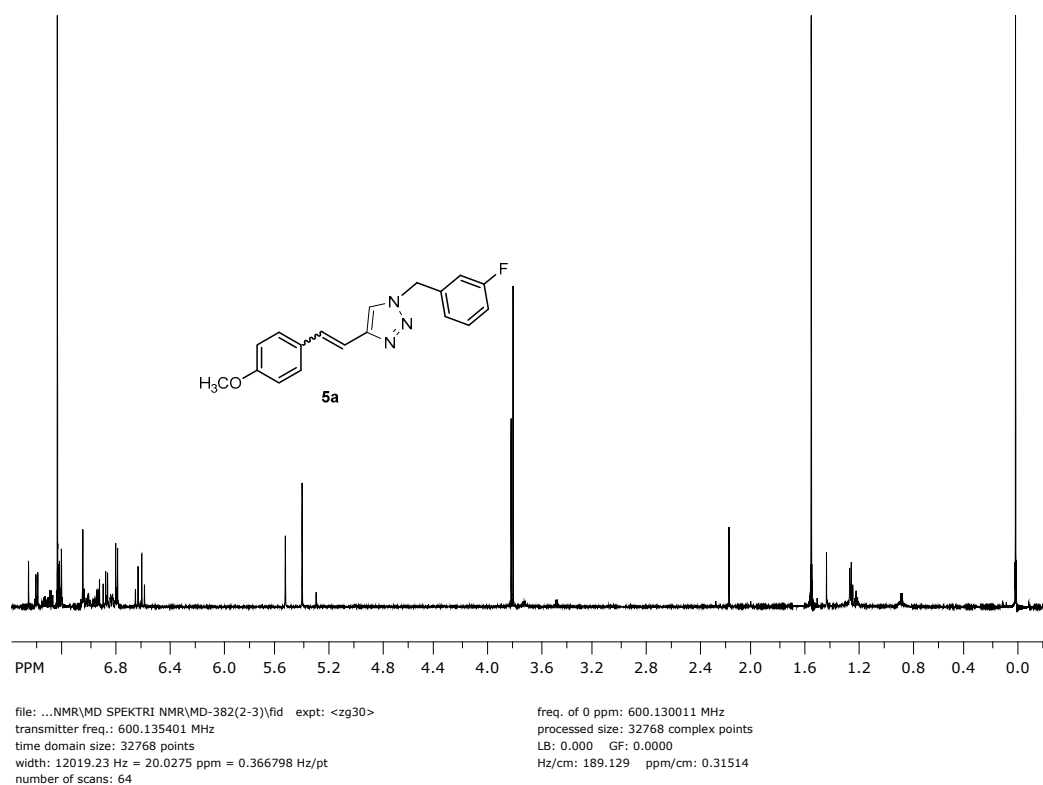

Figure S61.  $^1\text{H}$  NMR ( $\text{CDCl}_3$ ) spectrum of **5a** (mixture of *cis/trans*-isomers).



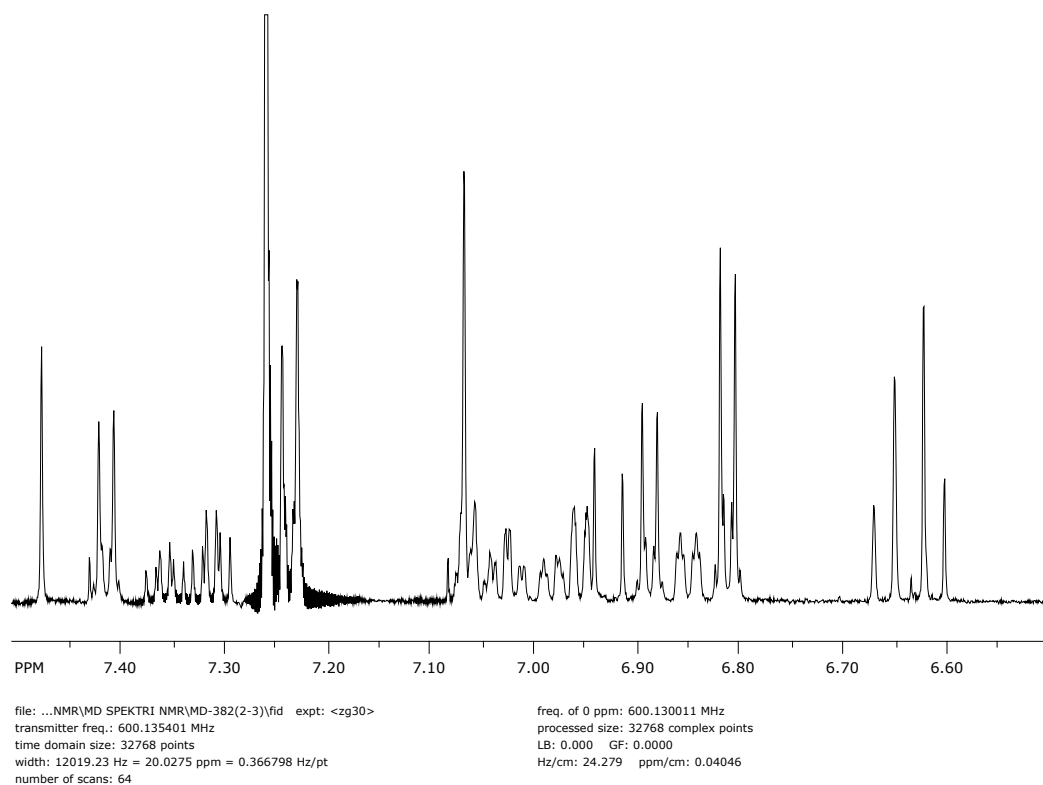

Figure S62.  $^1\text{H}$  NMR ( $\text{CDCl}_3$ ) spectrum of aromatic part (mixture of *cis/trans*-isomers) of **5a**.

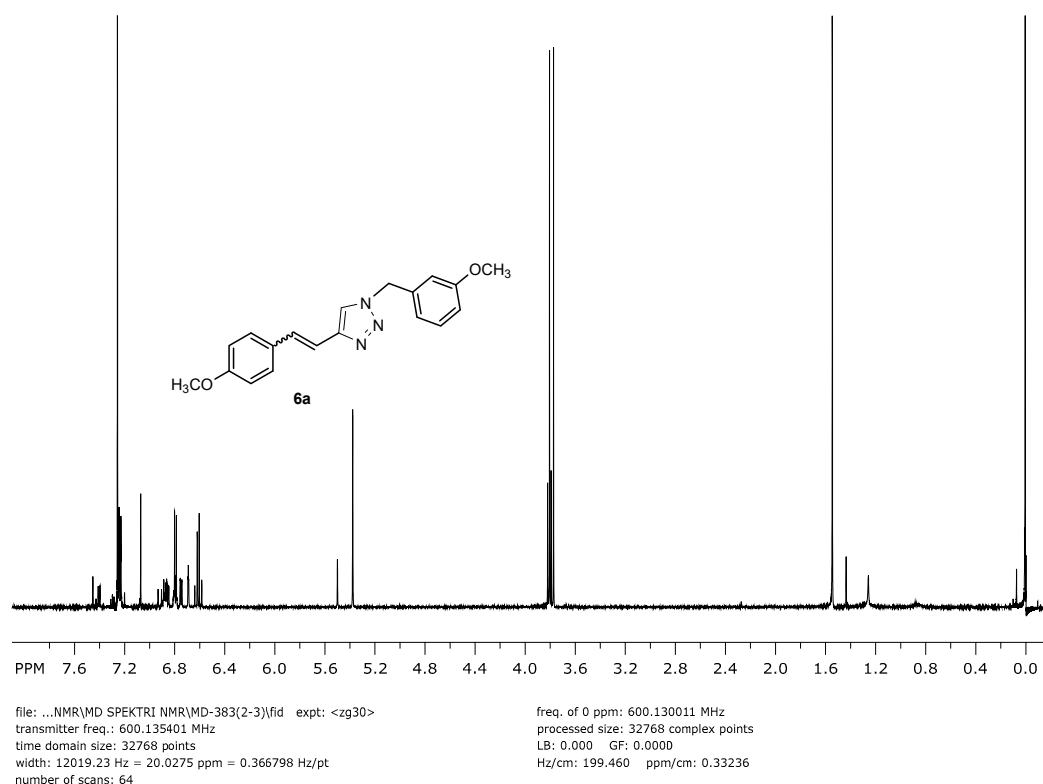

Figure S63.  $^1\text{H}$  NMR ( $\text{CDCl}_3$ ) spectrum of **6a** (mixture of *cis/trans*-isomers).

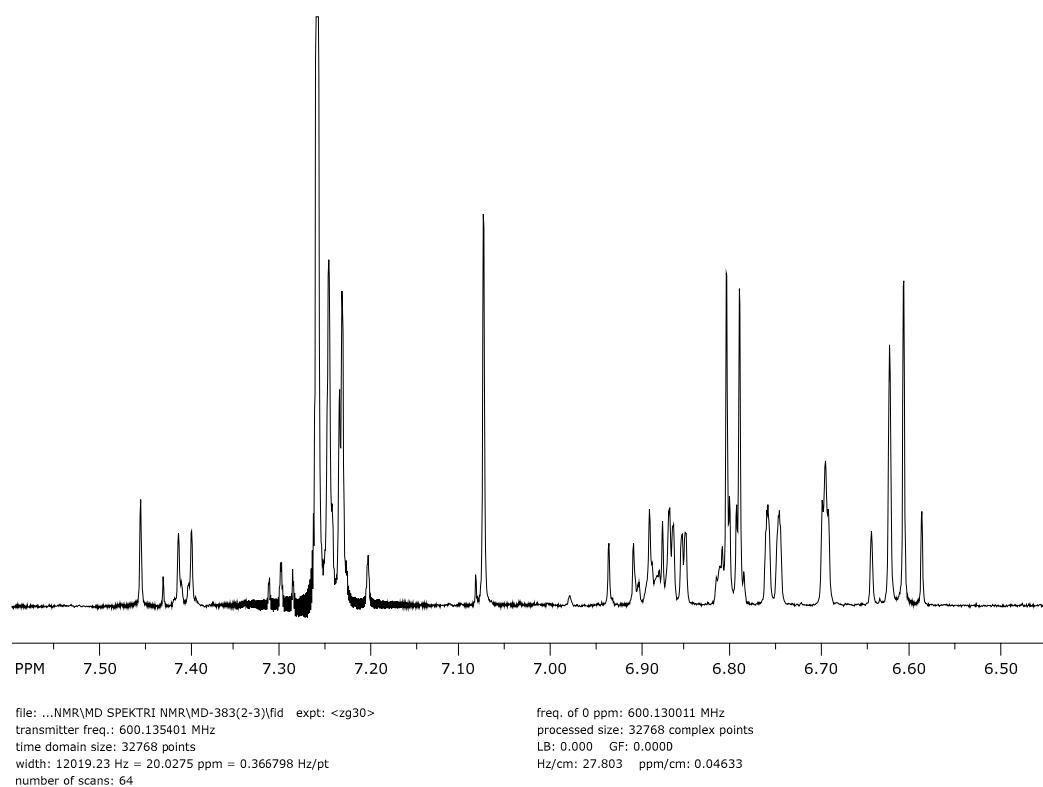

Figure S64.  $^1\text{H}$  NMR ( $\text{CDCl}_3$ ) spectrum of aromatic part (mixture of *cis/trans*-isomers) of **6a**.

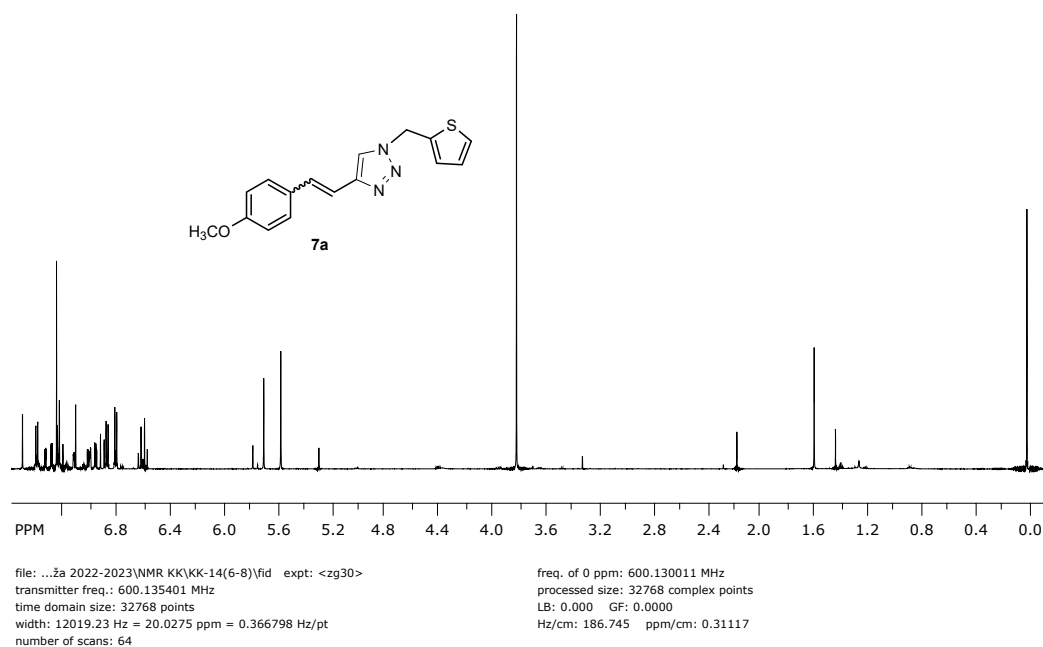

Figure S65.  $^1\text{H}$  NMR ( $\text{CDCl}_3$ ) spectrum of **7a** (mixture of *cis/trans*-isomers).

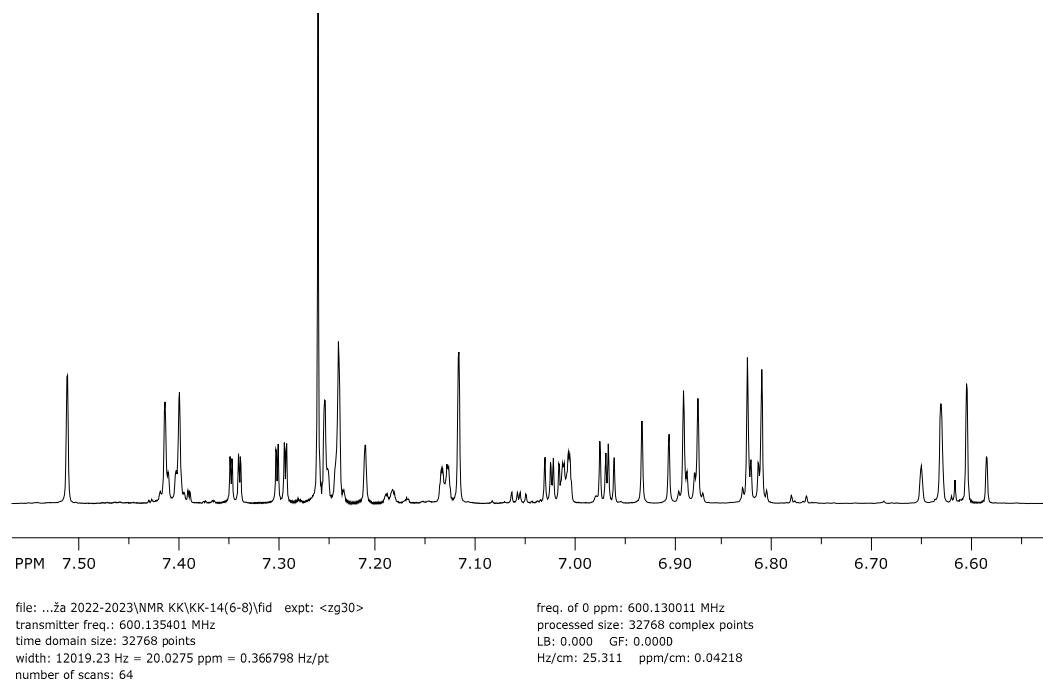

Figure S66.  $^1\text{H}$  NMR ( $\text{CDCl}_3$ ) spectrum of aromatic part (mixture of *cis/trans*-isomers) of **7a**.

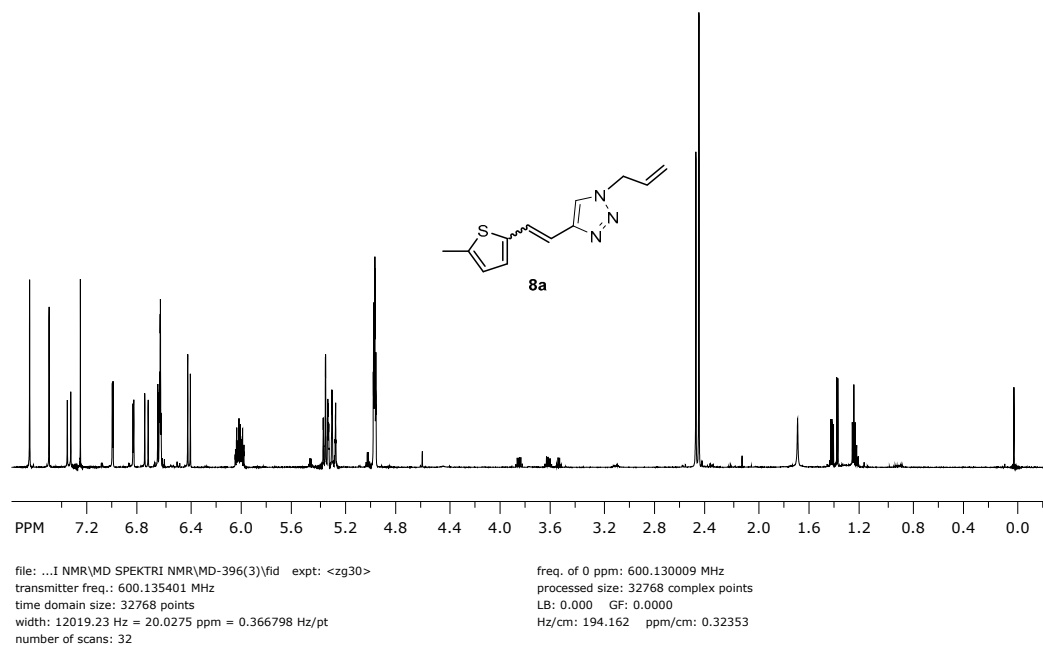

Figure S67.  $^1\text{H}$  NMR ( $\text{CDCl}_3$ ) spectrum of **8a** (mixture of *cis/trans*-isomers).

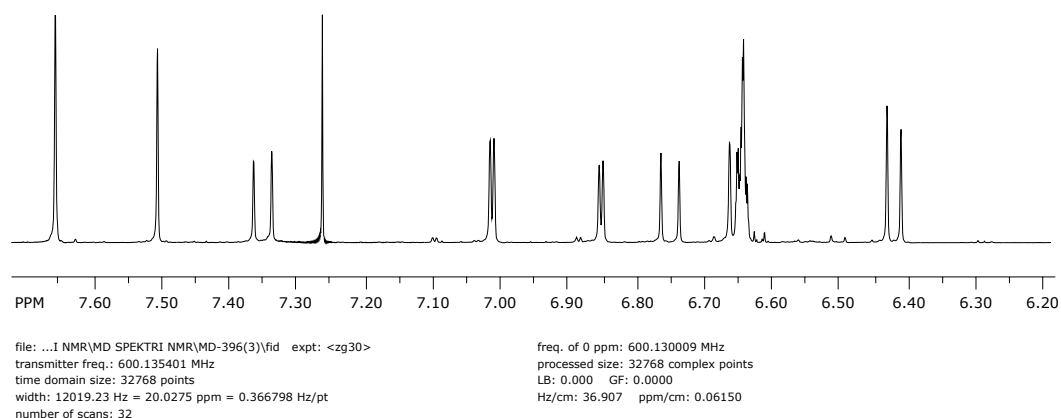

Figure S68.  $^1\text{H}$  NMR ( $\text{CDCl}_3$ ) spectrum of aromatic part (mixture of *cis/trans*-isomers) of **8a**.

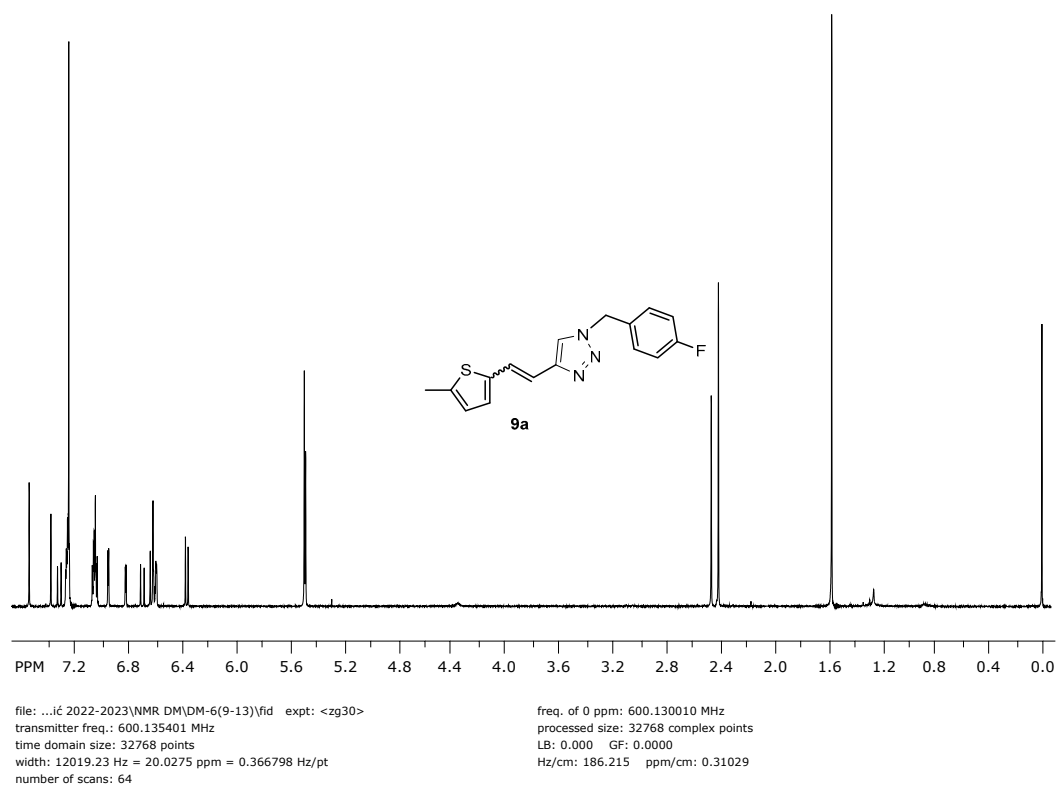

Figure S69.  $^1\text{H}$  NMR ( $\text{CDCl}_3$ ) spectrum of **9a** (mixture of *cis/trans*-isomers).

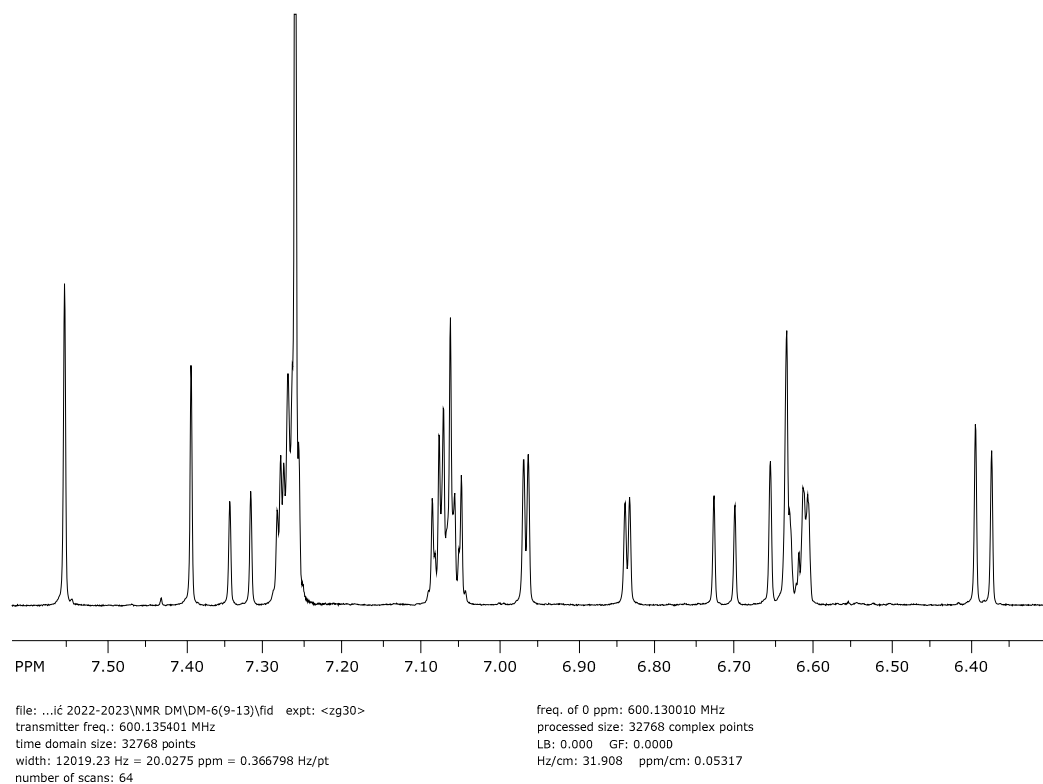

Figure S70.  $^1\text{H}$  NMR ( $\text{CDCl}_3$ ) spectrum of aromatic part (mixture of *cis/trans*-isomers) of **9a**.

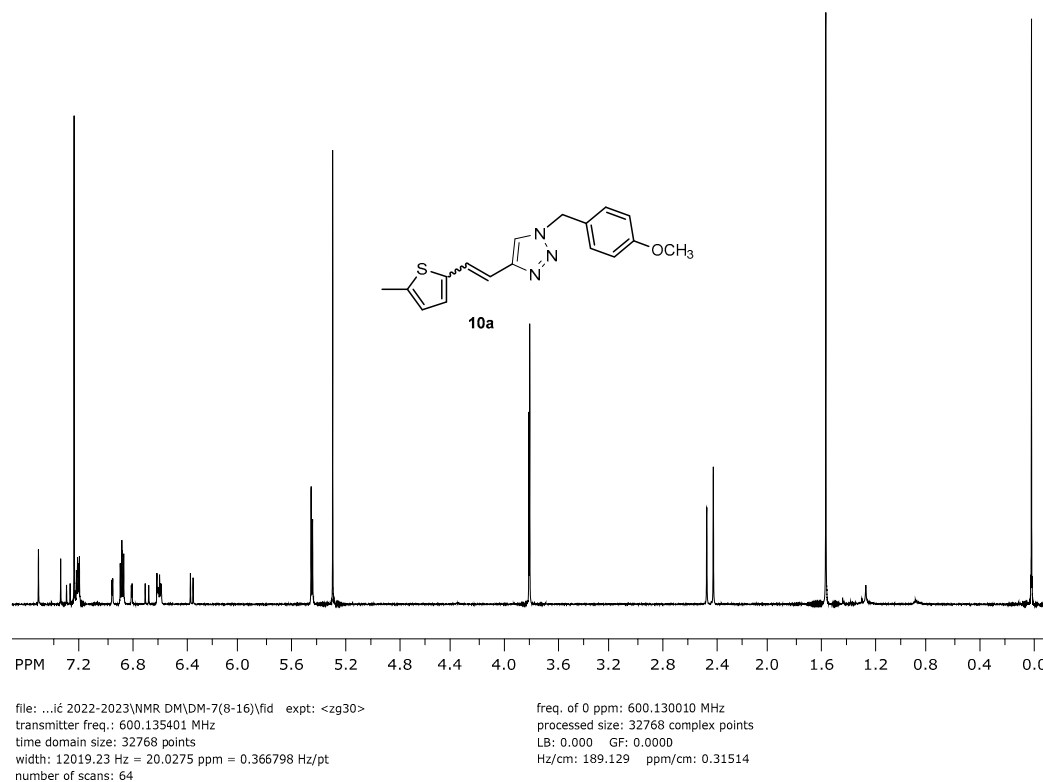

Figure S71.  $^1\text{H}$  NMR ( $\text{CDCl}_3$ ) spectrum of **10a** (mixture of *cis/trans*-isomers).

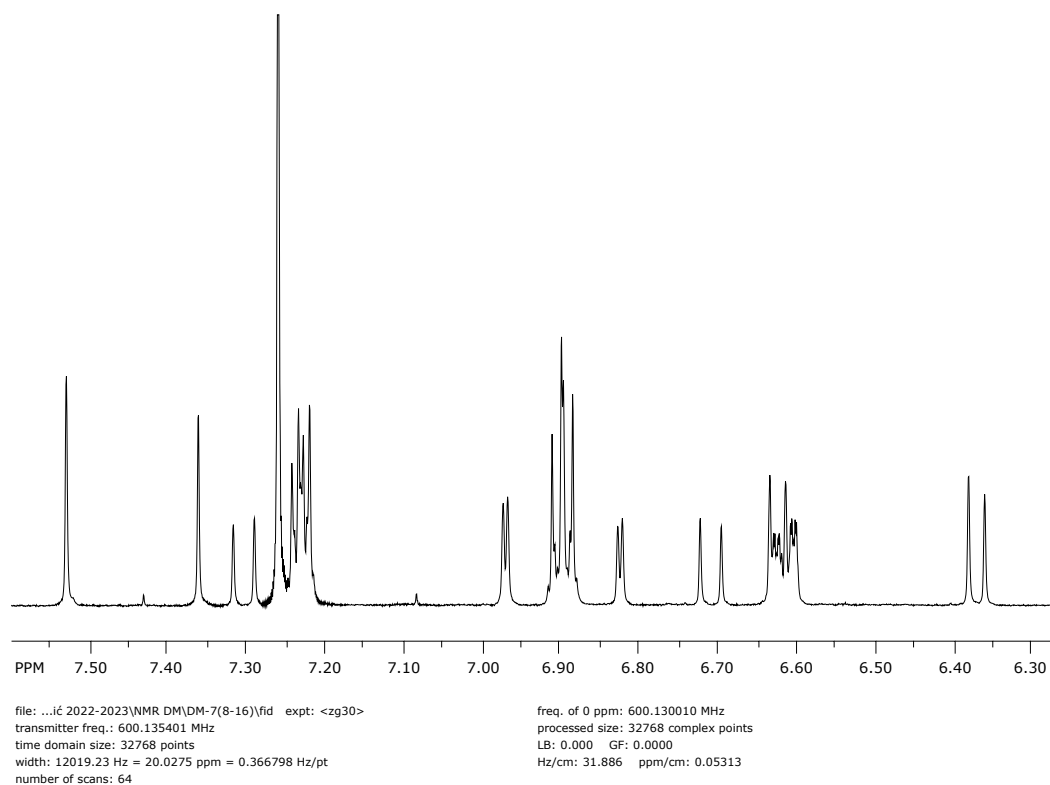

Figure S72.  $^1\text{H}$  NMR ( $\text{CDCl}_3$ ) spectrum of aromatic part (mixture of *cis/trans*-isomers) of **10a**.

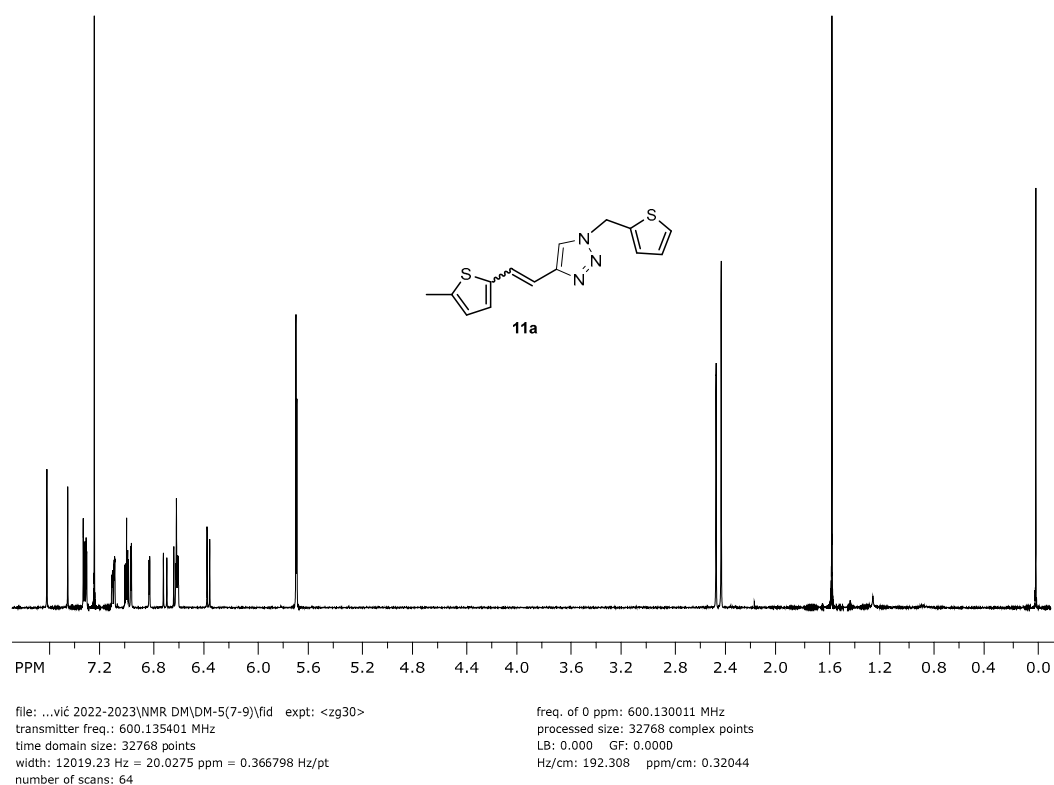

Figure S73.  $^1\text{H}$  NMR ( $\text{CDCl}_3$ ) spectrum of **11a** (mixture of *cis/trans*-isomers).

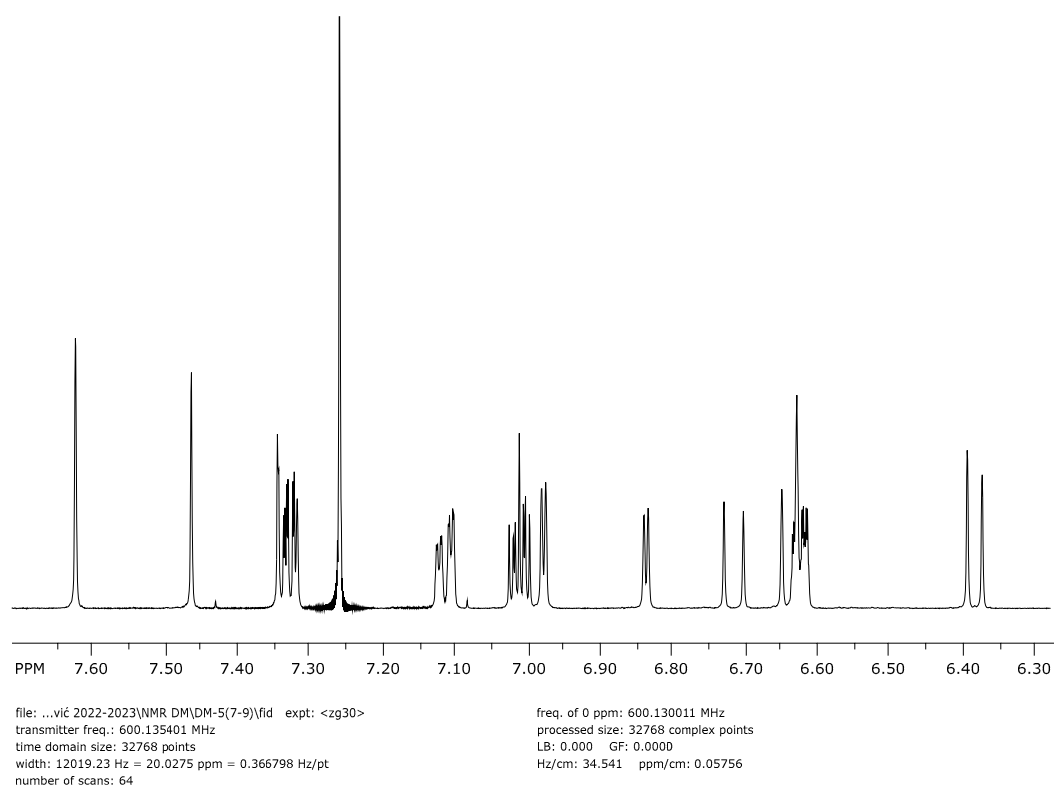

Figure S74.  $^1\text{H}$  NMR ( $\text{CDCl}_3$ ) spectrum of aromatic part (mixture of *cis/trans*-isomers) of **11a**.

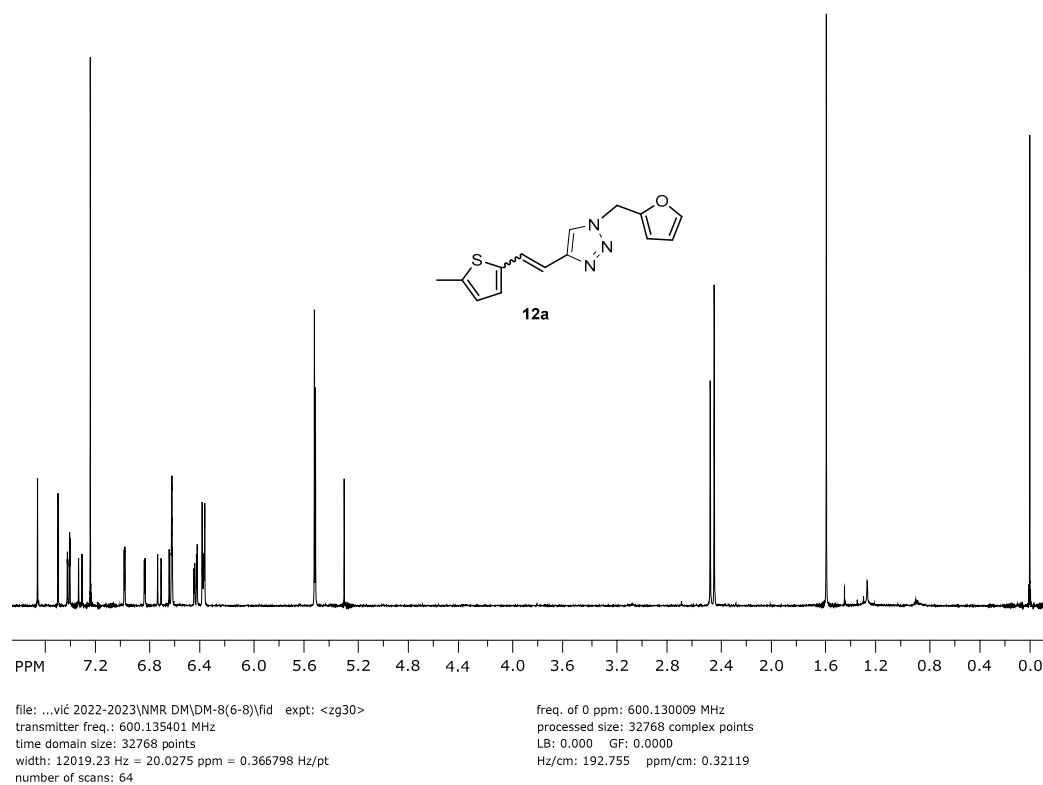

Figure S75.  $^1\text{H}$  NMR ( $\text{CDCl}_3$ ) spectrum of **12a** (mixture of *cis/trans*-isomers).

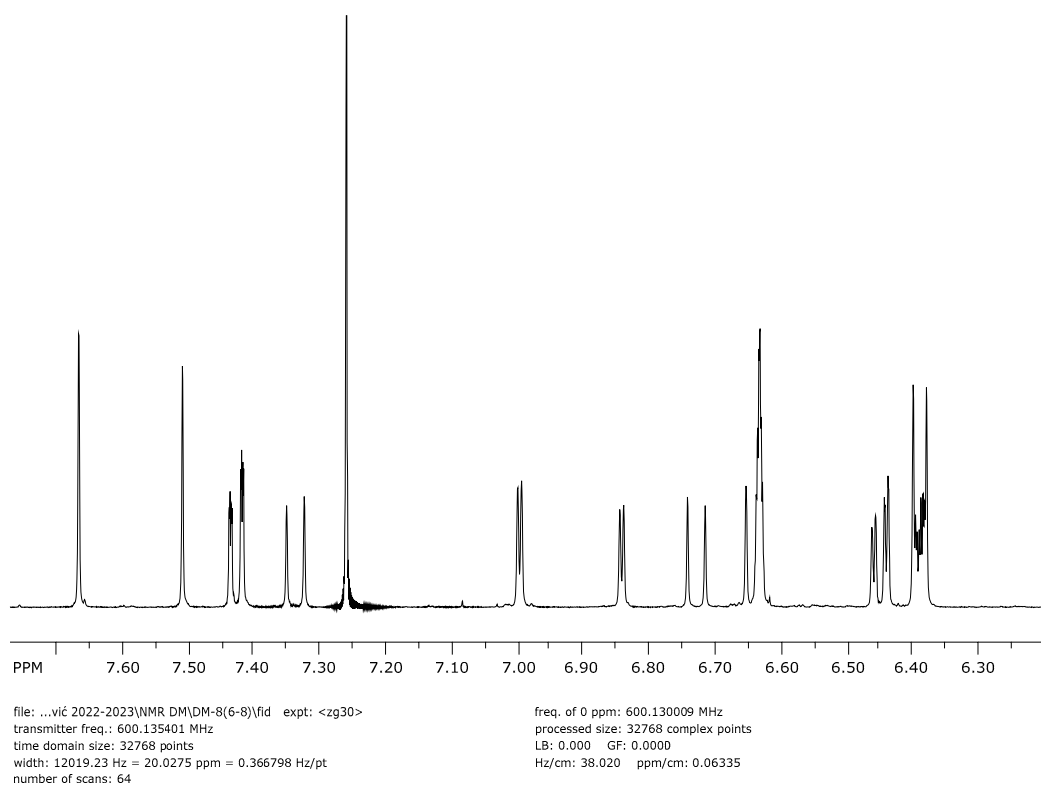

Figure S76.  $^1\text{H}$  NMR ( $\text{CDCl}_3$ ) spectrum of aromatic part (mixture of *cis/trans*-isomers) of **12a**.

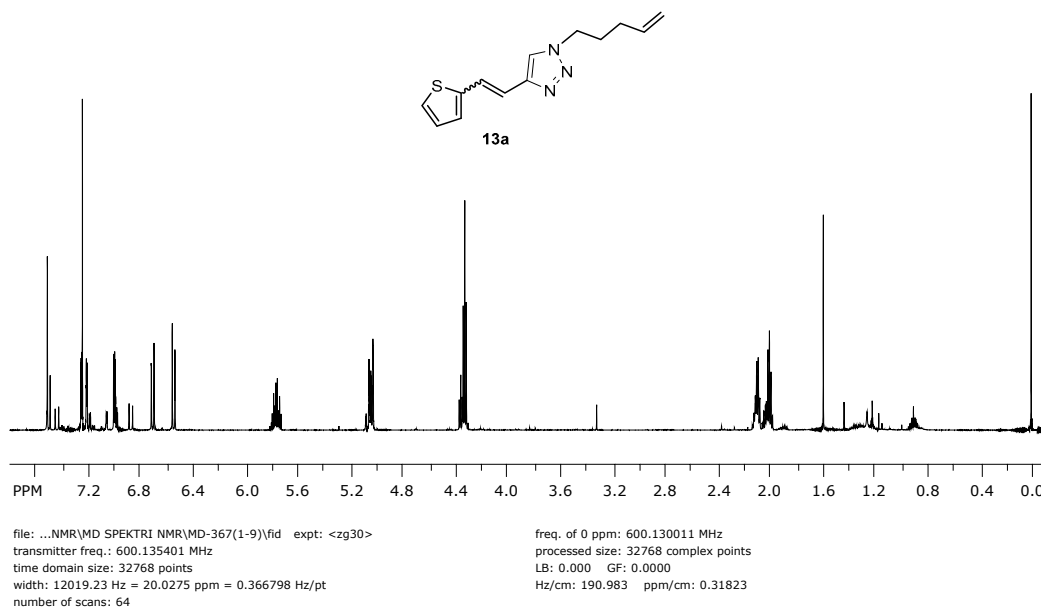

Figure S77.  $^1\text{H}$  NMR ( $\text{CDCl}_3$ ) spectrum of **13a** (mixture of *cis/trans*-isomers).



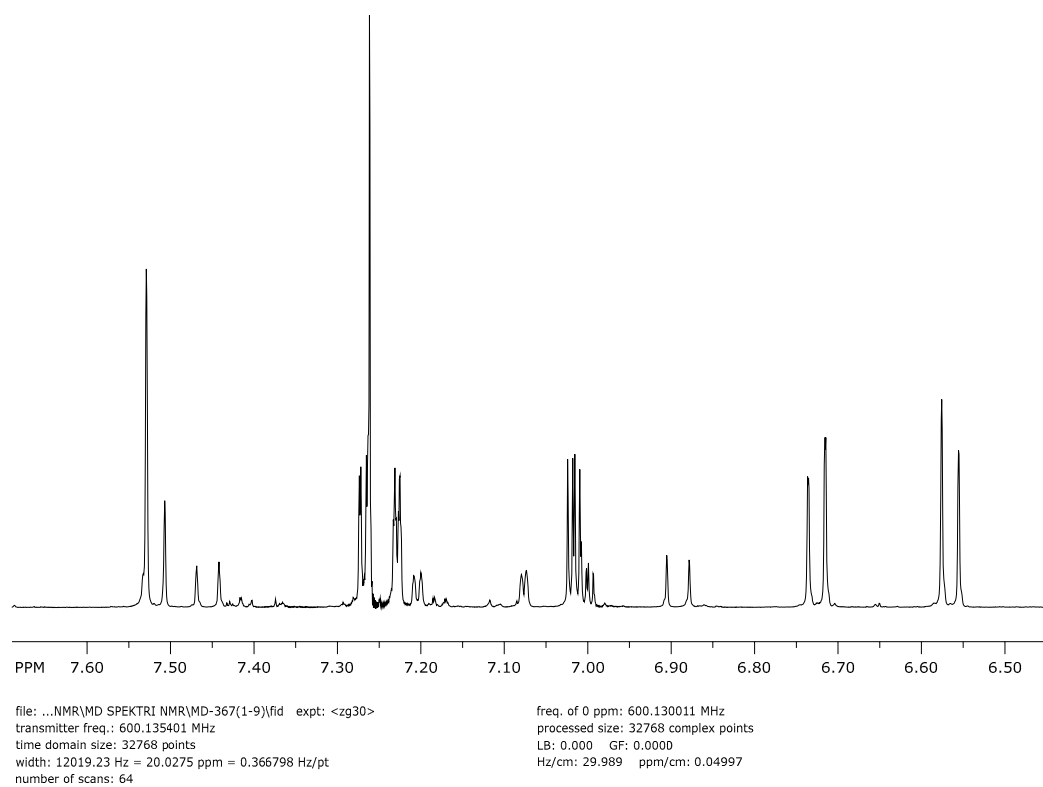

Figure S78. <sup>1</sup>H NMR (CDCl<sub>3</sub>) spectrum of aromatic part  
(mixture of *cis/trans*-isomers) of **13a**.

## 2. MS spectra and HRMS analyses of naphtho- and thienobenzo-triazoles

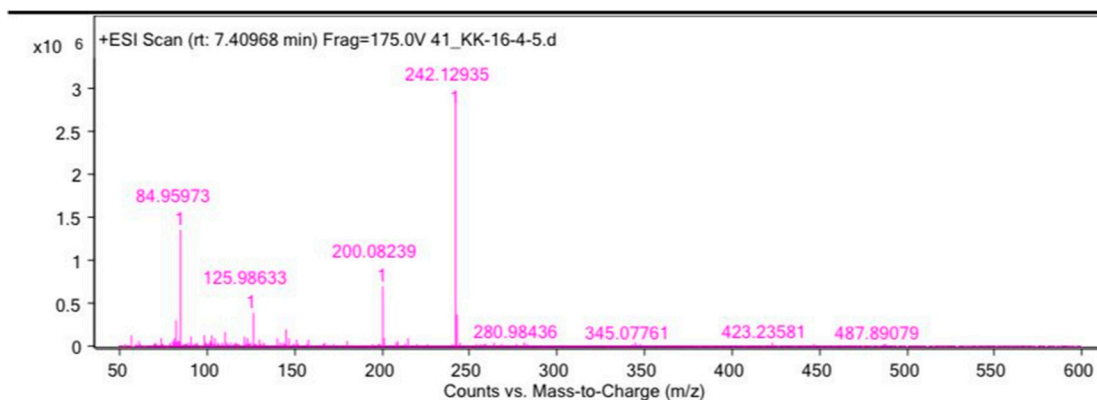

### Formula Calculator Results

| Formula      | Best | Mass      | Tgt Mass  | Diff (ppm) | Ion Species  | Score |
|--------------|------|-----------|-----------|------------|--------------|-------|
| C14 H15 N3 O | True | 241.12213 | 241.12151 | -2.54      | C14 H16 N3 O | 93.87 |

Figure S79. MS spectrum and HRMS analysis of **1**.

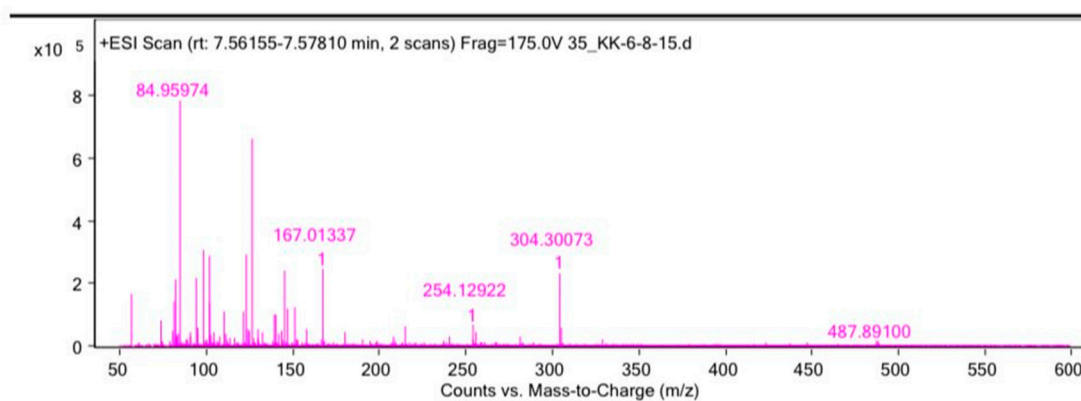

### Formula Calculator Results

| Formula      | Best | Mass      | Tgt Mass  | Diff (ppm) | Ion Species  | Score |
|--------------|------|-----------|-----------|------------|--------------|-------|
| C15 H15 N3 O | True | 253.12216 | 253.12151 | -2.58      | C15 H16 N3 O | 94.3  |

Figure S80. MS spectrum and HRMS analysis of **2**.

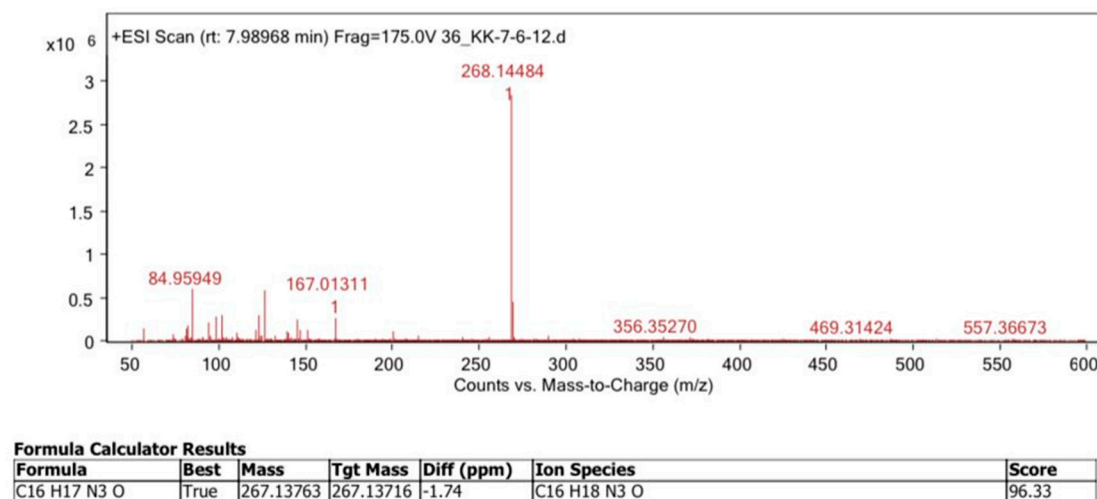

Figure S81. MS spectrum and HRMS analysis of **3**.

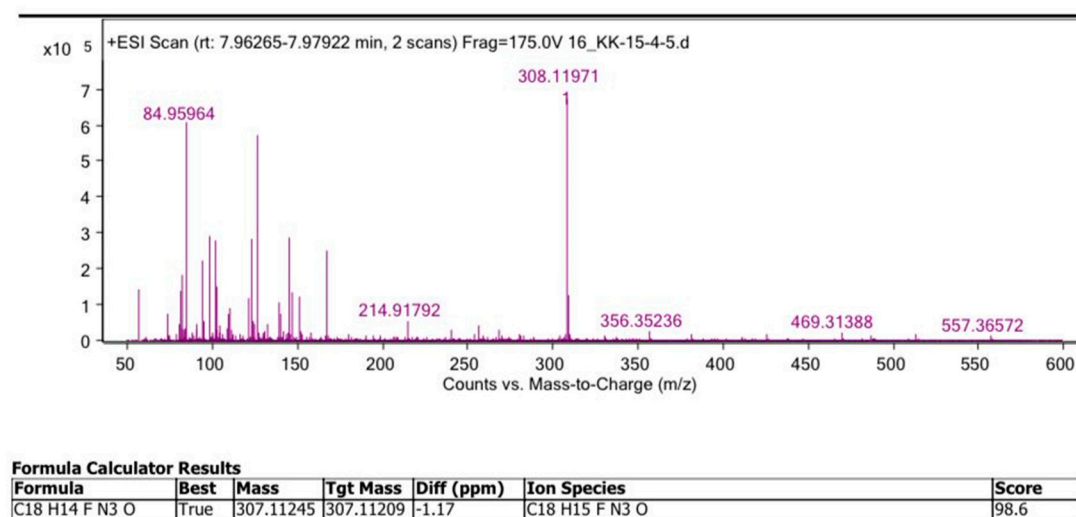

Figure S82. MS spectrum and HRMS analysis of **4**.

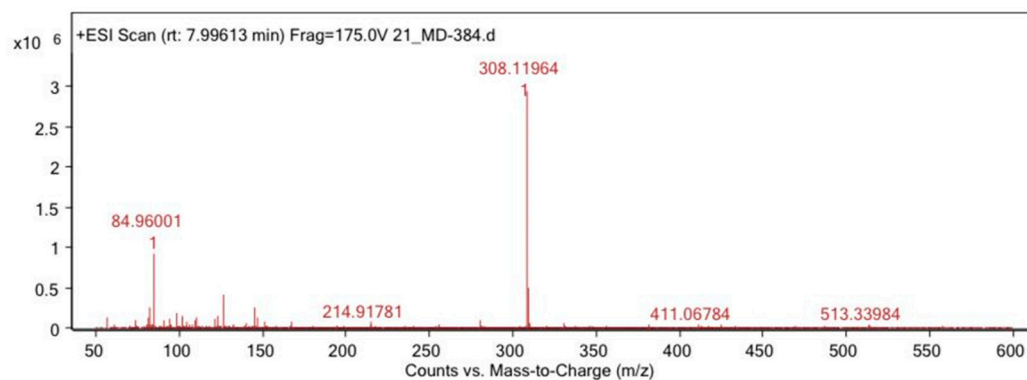

**Formula Calculator Results**

| Formula        | Best | Mass      | Tgt Mass  | Diff (ppm) | Ion Species    | Score |
|----------------|------|-----------|-----------|------------|----------------|-------|
| C18 H14 F N3 O | True | 307.11249 | 307.11209 | -1.3       | C18 H15 F N3 O | 94.97 |

Figure S83. MS spectrum and HRMS analysis of **5**.

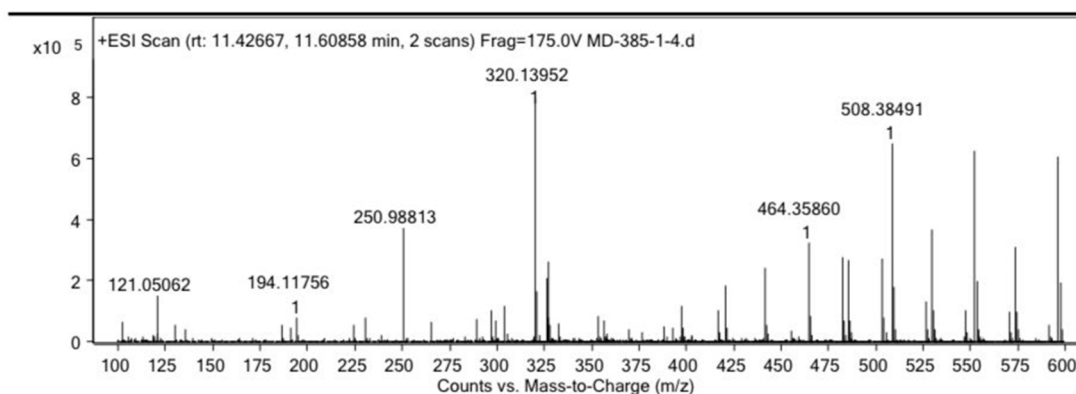

**Formula Calculator Results**

| Formula       | Best | Mass      | Tgt Mass  | Diff (ppm) | Ion Species   | Score |
|---------------|------|-----------|-----------|------------|---------------|-------|
| C19 H17 N3 O2 | True | 319.13227 | 319.13208 | -0.59      | C19 H18 N3 O2 | 99.38 |

Figure S84. MS spectrum and HRMS analysis of **6**.

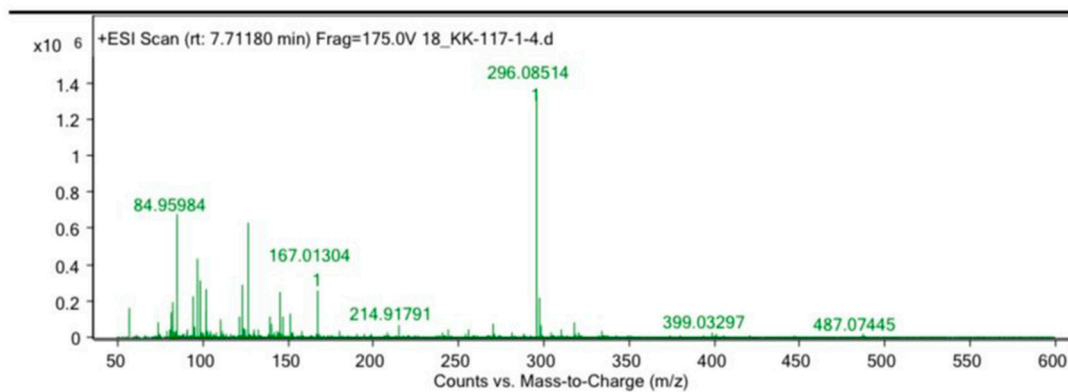

**Formula Calculator Results**

| Formula        | Best | Mass      | Tgt Mass  | Diff (ppm) | Ion Species    | Score |
|----------------|------|-----------|-----------|------------|----------------|-------|
| C16 H13 N3 O S | True | 295.07812 | 295.07793 | -0.64      | C16 H14 N3 O S | 93.67 |

Figure S85. MS spectrum and HRMS analysis of **7**.

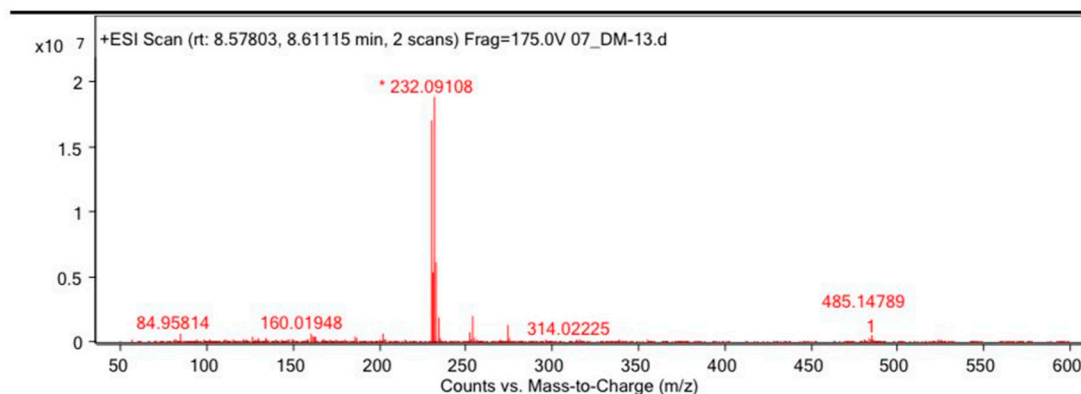

**Formula Calculator Results**

| Formula      | Best | Mass     | Tgt Mass  | Diff (ppm) | Ion Species  | Score |
|--------------|------|----------|-----------|------------|--------------|-------|
| C12 H11 N3 S | True | 229.0679 | 229.06737 | -2.33      | C12 H12 N3 S | 46.38 |

Figure S86. MS spectrum and HRMS analysis of **8**.

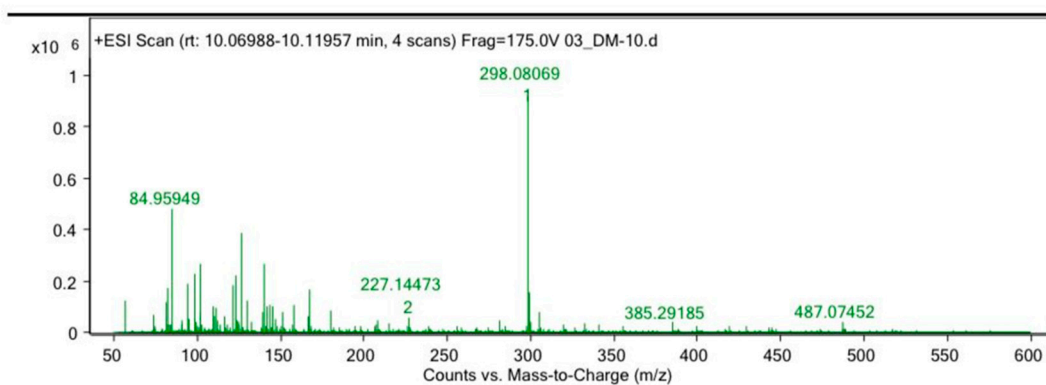

**Formula Calculator Results**

| Formula        | Best | Mass      | Tgt Mass | Diff (ppm) | Ion Species    | Score |
|----------------|------|-----------|----------|------------|----------------|-------|
| C16 H12 F N3 S | True | 297.07351 | 297.0736 | 0.29       | C16 H13 F N3 S | 97.42 |

Figure S87. MS spectrum and HRMS analysis of **9**.

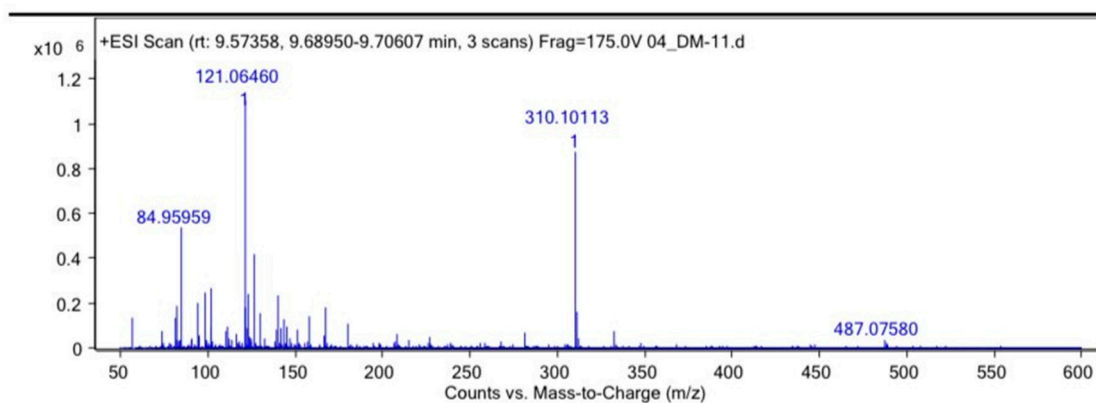

**Formula Calculator Results**

| Formula        | Best | Mass      | Tgt Mass  | Diff (ppm) | Ion Species    | Score |
|----------------|------|-----------|-----------|------------|----------------|-------|
| C17 H15 N3 O S | True | 309.09399 | 309.09358 | -1.33      | C17 H16 N3 O S | 96.47 |

Figure S88. MS spectrum and HRMS analysis of **10**.

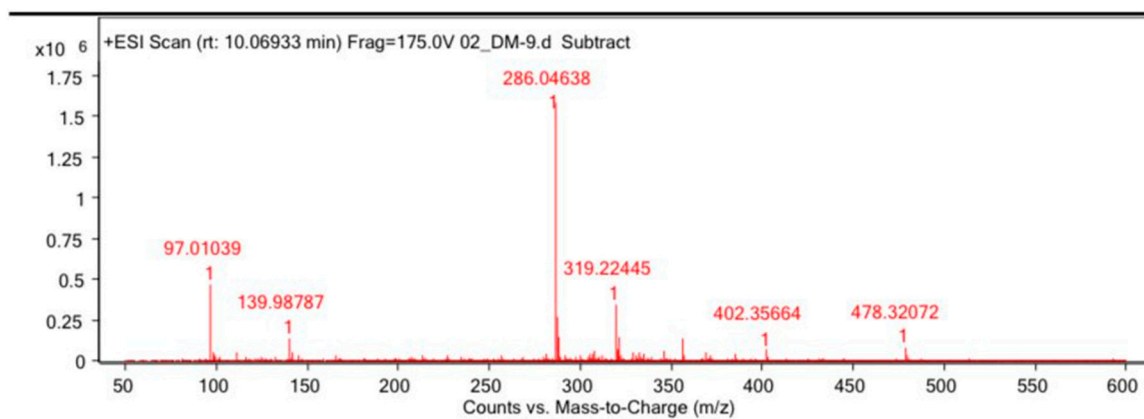

**Formula Calculator Results**

| Formula       | Best | Mass     | Tgt Mass  | Diff (ppm) | Ion Species   | Score |
|---------------|------|----------|-----------|------------|---------------|-------|
| C14 H11 N3 S2 | True | 285.0392 | 285.03944 | 0.84       | C14 H12 N3 S2 | 97.91 |

Figure S89. MS spectrum and HRMS analysis of **11**.

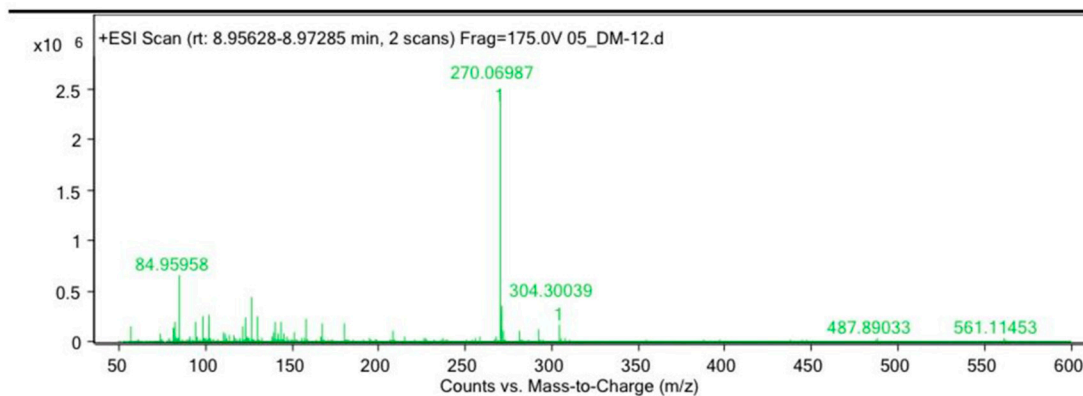

**Formula Calculator Results**

| Formula        | Best | Mass      | Tgt Mass  | Diff (ppm) | Ion Species    | Score |
|----------------|------|-----------|-----------|------------|----------------|-------|
| C14 H11 N3 O S | True | 269.06269 | 269.06228 | -1.5       | C14 H12 N3 O S | 96.45 |

Figure S90. MS spectrum and HRMS analysis of **12**.

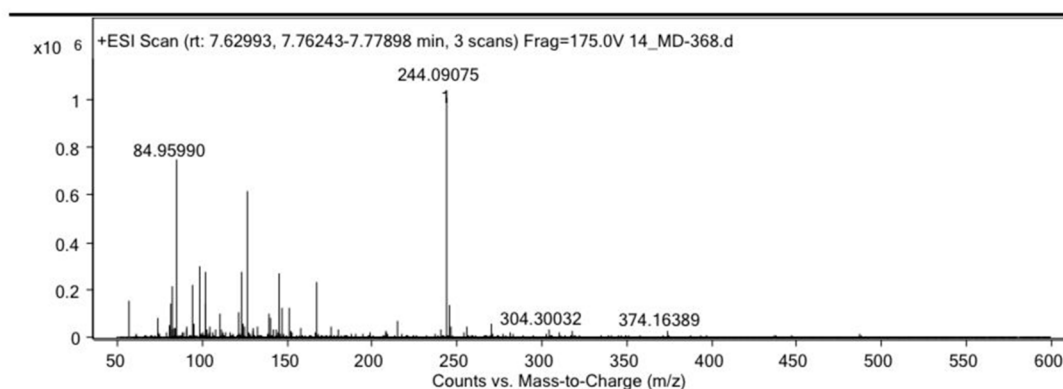

**Formula Calculator Results**

| Formula      | Best | Mass     | Tgt Mass  | Diff (ppm) | Ion Species  | Score |
|--------------|------|----------|-----------|------------|--------------|-------|
| C13 H13 N3 S | True | 243.0835 | 243.08302 | -1.97      | C13 H14 N3 S | 96.6  |

Figure S91. MS spectrum and HRMS analysis of **13**.



**Table S1.** Free energies of binding,  $\Delta G_{\text{bind}}$  obtained by molecular docking of listed molecules into the active site of AchE (4EY7.pdb), along with the number of conformational clusters and distribution of conformations.

| Ligand      | $\Delta G_{\text{bind}}/\text{kcal mol}^{-1}$ |         | Number of distinctive conformational clusters | Distribution of conformations within clusters with $n > 1$ ( $n$ = cluster population) | Experiment $\text{IC}_{50}/\mu\text{M}$ |
|-------------|-----------------------------------------------|---------|-----------------------------------------------|----------------------------------------------------------------------------------------|-----------------------------------------|
|             | lowest                                        | highest |                                               |                                                                                        |                                         |
| <b>3</b>    | -8.91                                         | -8.14   | 4                                             | 4, 3, 17                                                                               | 51.3                                    |
| <b>5</b>    | -9.53                                         | -9.05   | 4                                             | 17, 3, 4                                                                               | 55.5                                    |
| Donepezil   | -11.37                                        | -10.75  | 4                                             | 22                                                                                     | -                                       |
| Galantamine | -10.11                                        | -10.10  | 1                                             | 25                                                                                     | 0.15                                    |

**Table S2.** Free energies of binding,  $\Delta G_{\text{bind}}$  obtained by molecular docking of listed molecules into the active site of BchE (1P0I.pdb), along with the number of conformational clusters and distribution of conformations.

| Ligand      | $\Delta G_{\text{bind}}/\text{kcal mol}^{-1}$ |         | Number of distinctive conformational clusters | Distribution of conformations within clusters with $n > 1$ ( $n$ = cluster population) | Experiment $\text{IC}_{50}/\mu\text{M}$ |
|-------------|-----------------------------------------------|---------|-----------------------------------------------|----------------------------------------------------------------------------------------|-----------------------------------------|
|             | lowest                                        | highest |                                               |                                                                                        |                                         |
| <b>3</b>    | -7.56                                         | -6.96   | 6                                             | 10, 3, 9                                                                               | 53.5                                    |
| <b>13</b>   | -6.81                                         | -6.02   | 6                                             | 16, 2, 4                                                                               | 40.7                                    |
| Donepezil   | -9.58                                         | -8.29   | 3                                             | 9, 8, 4                                                                                | -                                       |
| Galantamine | -7.49                                         | -7.44   | 1                                             | 25                                                                                     | 7.9                                     |

**Table S3.** Root-mean-square displacement (RMSD), RMS fluctuations of alpha carbons of the protein backbone, and radius of gyration for complexes of AChE and ligands listed in the table, derived by molecular dynamics simulation of 30 ns.

| Ligand   | RMSD/Å  |            | RMSF/Å  |            | Rg/Å    |                 |
|----------|---------|------------|---------|------------|---------|-----------------|
|          | average | min, max   | average | min, max   | average | min, max        |
| <b>3</b> | 1.69    | 0.78, 2.01 | 0.66    | 0.34, 1.75 | 22.77   | 22.57,<br>22.93 |
| <b>5</b> | 1.74    | 0.77, 2.19 | 0.70    | 0.32, 2.13 | 22.84   | 22.60,<br>23.08 |

**Table S4.** Root-mean-square displacement (RMSD), RMS fluctuations of alpha carbons of the protein backbone, and radius of gyration for complexes of BChE and ligands listed in the table, derived by molecular dynamics simulation of 30 ns.

| Ligand    | RMSD/Å  |            | RMSF/Å  |            | Rg/Å    |                 |
|-----------|---------|------------|---------|------------|---------|-----------------|
|           | average | min, max   | average | min, max   | average | min, max        |
| <b>3</b>  | 1.97    | 0.85, 2.43 | 0.73    | 0.33, 2.82 | 22.86   | 22.66,<br>22.08 |
| <b>13</b> | 1.74    | 0.75, 2.17 | 0.77    | 0.34, 2.47 | 22.99   | 22.74,<br>23.22 |
